# Supplementary material
Source: MDPI journal article supplement (https://www.mdpi.com/1424-8247/14/7/653)
Supplement: s1 [file s1]

## Supplementary Materials

# Bioactive Compounds from *Euphorbia usambarica* Pax. with HIV-1 Latency Reversal Activity

Yu-Chi Tsai <sup>1</sup>, Racheal A. Nell <sup>2</sup>, Jonathan E. Buckendorf <sup>2</sup>, Norbert Kúsz <sup>1</sup>, Peter Waweru Mwangi <sup>3</sup>, Róbert Berkecz <sup>4</sup>, Dóra Rédei <sup>1</sup>, Andrea Vasas <sup>1</sup>, Adam M. Spivak <sup>2,\*</sup> and Judit Hohmann <sup>1,5,\*</sup>

<sup>1</sup> Department of Pharmacognosy, Interdisciplinary Excellence Centre, University of Szeged, H-6720 Szeged, Hungary

<sup>2</sup> Department of Medicine, University of Utah School of Medicine, Salt Lake City, Utah 84132, USA

<sup>3</sup> Department of Medical Physiology, School of Medicine, University of Nairobi, P.O Box 30197-00100, Nairobi, Kenya

<sup>4</sup> Department of Medical Chemistry, University of Szeged, H-6720 Szeged, Hungary

<sup>5</sup> Interdisciplinary Centre of Natural Products, University of Szeged, H-6720 Szeged, Hungary

\* Correspondence: [adam.spivak@hsc.utah.edu](mailto:adam.spivak@hsc.utah.edu) (A.M.S.); [hohmann.judit@szte.hu](mailto:hohmann.judit@szte.hu) (J.H.)

## TABLE OF CONTENTS

|                                                                                                                 |    |
|-----------------------------------------------------------------------------------------------------------------|----|
| <b>Figure S1.</b> The $^1\text{H}$ -NMR spectrum of euphordraculoate C (1) (500 MHz, $\text{CDCl}_3$ ).....     | 7  |
| <b>Figure S2.</b> The $^{13}\text{C}$ -JMOD spectrum of euphordraculoate C (1) (125 MHz, $\text{CDCl}_3$ )..... | 7  |
| <b>Figure S3.</b> The HSQC spectrum of euphordraculoate C (1). ....                                             | 8  |
| <b>Figure S5.</b> The HMBC spectrum of euphordraculoate C (1). ....                                             | 9  |
| <b>Figure S6.</b> The NOESY spectrum of euphordraculoate C (1). ....                                            | 9  |
| <b>Figure S7.</b> The HR-ESIMS spectra of euphordraculoate C (1). ....                                          | 10 |
| <b>Figure S8.</b> The $^1\text{H}$ -NMR spectrum of usambariphane A (2) (500 MHz, $\text{CDCl}_3$ ).....        | 11 |
| <b>Figure S9.</b> The $^{13}\text{C}$ -JMOD spectrum of usambariphane A (2) (125 MHz, $\text{CDCl}_3$ ). ....   | 11 |
| <b>Figure S10.</b> The HSQC spectrum of usambariphane A (2). ....                                               | 12 |
| <b>Figure S11.</b> The $^1\text{H}$ - $^1\text{H}$ COSY spectrum of usambariphane A (2). ....                   | 12 |
| <b>Figure S12.</b> The HMBC spectrum of usambariphane A (2). ....                                               | 13 |
| <b>Figure S13.</b> The NOESY spectrum of usambariphane A (2). ....                                              | 13 |
| <b>Figure S14.</b> The HR-ESIMS spectra of usambariphane A (2). ....                                            | 14 |
| <b>Figure S15.</b> The $^1\text{H}$ -NMR spectrum of usambariphane B (3) (500 MHz, $\text{CDCl}_3$ ). ....      | 15 |
| <b>Figure S16.</b> The $^{13}\text{C}$ -JMOD spectrum of usambariphane B (3) (125 MHz, $\text{CDCl}_3$ ). ....  | 15 |
| <b>Figure S17.</b> The HSQC spectrum of usambariphane B (3). ....                                               | 16 |
| <b>Figure S18.</b> The $^1\text{H}$ - $^1\text{H}$ COSY spectrum of usambariphane B (3). ....                   | 16 |
| <b>Figure S19.</b> The HMBC spectrum of usambariphane B (3). ....                                               | 17 |
| <b>Figure S20.</b> The NOESY spectrum of usambariphane B (3). ....                                              | 17 |
| <b>Figure S21.</b> The HR-ESIMS spectra of usambariphane B (3). ....                                            | 18 |
| <b>Figure S22.</b> The $^1\text{H}$ -NMR spectrum of usambariphane C (4) (500 MHz, $\text{CDCl}_3$ ).....       | 19 |
| <b>Figure S23.</b> The $^{13}\text{C}$ -JMOD spectrum of usambariphane C (4) (125 MHz, $\text{CDCl}_3$ ).....   | 19 |
| <b>Figure S24.</b> The HSQC spectrum of usambariphane C (4). ....                                               | 20 |
| <b>Figure S25.</b> The $^1\text{H}$ - $^1\text{H}$ COSY spectrum of usambariphane C (4). ....                   | 20 |
| <b>Figure S26.</b> The HMBC spectrum of usambariphane C (4). ....                                               | 21 |
| <b>Figure S27.</b> The NOESY spectrum of usambariphane C (4). ....                                              | 21 |
| <b>Figure S28.</b> The HR-ESIMS spectra of usambariphane C (4). ....                                            | 22 |
| <b>Figure S29.</b> The $^1\text{H}$ -NMR spectrum of usambariphane D (5) (500 MHz, $\text{CDCl}_3$ ).....       | 23 |

|                                                                                                                  |    |
|------------------------------------------------------------------------------------------------------------------|----|
| <b>Figure S30.</b> The $^{13}\text{C}$ -JMOD spectrum of usambariphane D (5) (125 MHz, $\text{CDCl}_3$ ).....    | 23 |
| <b>Figure S31.</b> The HSQC spectrum of usambariphane D (5).....                                                 | 24 |
| <b>Figure S32.</b> The $^1\text{H}$ - $^1\text{H}$ COSY spectrum of usambariphane D (5). ....                    | 24 |
| <b>Figure S33.</b> The HMBC spectrum of usambariphane D (5).....                                                 | 25 |
| <b>Figure S34.</b> The NOESY spectrum of usambariphane D (5).....                                                | 25 |
| <b>Figure S36.</b> The $^1\text{H}$ -NMR spectrum of usambariphane E (6) (500 MHz, $\text{CDCl}_3$ ). ....       | 27 |
| <b>Figure S37.</b> The $^{13}\text{C}$ -JMOD spectrum of usambariphane E (6) (125 MHz, $\text{CDCl}_3$ ). ....   | 27 |
| <b>Figure S38.</b> The HSQC spectrum of usambariphane E (6).....                                                 | 28 |
| <b>Figure S39.</b> The $^1\text{H}$ - $^1\text{H}$ COSY spectrum of usambariphane E (6).....                     | 28 |
| <b>Figure S40.</b> The HMBC spectrum of usambariphane E (6). ....                                                | 29 |
| <b>Figure S41.</b> The NOESY spectrum of usambariphane E (6). ....                                               | 29 |
| <b>Figure S42.</b> The HR-ESI-MS spectra of usambariphane E (6). ....                                            | 30 |
| <b>Figure S43.</b> The $^1\text{H}$ -NMR spectrum of usambariphane F (7) (500 MHz, $\text{CDCl}_3$ ).....        | 31 |
| <b>Figure S44.</b> The $^{13}\text{C}$ -JMOD spectrum of usambariphane F (7) (125 MHz, $\text{CDCl}_3$ ). ....   | 31 |
| <b>Figure S45.</b> The HSQC spectrum of usambariphane F (7).....                                                 | 32 |
| <b>Figure S46.</b> The $^1\text{H}$ - $^1\text{H}$ COSY spectrum of usambariphane F (7). ....                    | 32 |
| <b>Figure S47.</b> The HMBC spectrum of usambariphane F (7).....                                                 | 33 |
| <b>Figure S48.</b> The NOESY spectrum of usambariphane F (7). ....                                               | 33 |
| <b>Figure S49.</b> The HR-ESI-MS spectra of usambariphane F (7).....                                             | 34 |
| <b>Figure S50.</b> The $^1\text{H}$ -NMR spectrum of usambariphane G (8) (500 MHz, $\text{CDCl}_3$ ).....        | 35 |
| <b>Figure S51.</b> The $^{13}\text{C}$ -JMOD spectrum of usambariphane G (8) (125 MHz, $\text{CDCl}_3$ ).....    | 35 |
| <b>Figure S52.</b> The HSQC spectrum of usambariphane G (8).....                                                 | 36 |
| <b>Figure S53.</b> The $^1\text{H}$ - $^1\text{H}$ COSY spectrum of usambariphane G (8). ....                    | 36 |
| <b>Figure S54.</b> The HMBC spectrum of usambariphane G (8).....                                                 | 37 |
| <b>Figure S55.</b> The NOESY spectrum of usambariphane G (8).....                                                | 37 |
| <b>Figure S56.</b> The HR-ESI-MS spectra of usambariphane G (8).....                                             | 38 |
| <b>Figure S57.</b> The $^1\text{H}$ -NMR spectrum of isoterracinolide C (9) (500 MHz, $\text{CDCl}_3$ ).....     | 39 |
| <b>Figure S58.</b> The $^{13}\text{C}$ -JMOD spectrum of isoterracinolide C (9) (500 MHz, $\text{CDCl}_3$ )..... | 39 |
| <b>Figure S59.</b> The HSQC spectrum of isoterracinolide C (9). ....                                             | 40 |

|                                                                                                                                                                 |    |
|-----------------------------------------------------------------------------------------------------------------------------------------------------------------|----|
| <b>Figure S60.</b> The $^1\text{H}$ - $^1\text{H}$ COSY spectrum of isoterracinolide C ( <b>9</b> ). .....                                                      | 40 |
| <b>Figure S61.</b> The HMBC spectrum of isoterracinolide C ( <b>9</b> ). .....                                                                                  | 41 |
| <b>Figure S62.</b> The NOESY spectrum of isoterracinolide C ( <b>9</b> ). .....                                                                                 | 41 |
| <b>Figure S63.</b> The HR-ESI-MS spectra of isoterracinolide C ( <b>9</b> ). .....                                                                              | 42 |
| <b>Figure S64.</b> The $^1\text{H}$ -NMR spectrum of $4\beta$ -crotignoid K ( <b>14</b> ) (500 MHz, $\text{CDCl}_3$ ). .....                                    | 43 |
| <b>Figure S65.</b> The $^{13}\text{C}$ -JMOD spectrum of $4\beta$ -crotignoid K ( <b>14</b> ) (125 MHz, $\text{CDCl}_3$ ). .....                                | 43 |
| <b>Figure S66.</b> The HSQC spectrum of $4\beta$ -crotignoid K ( <b>14</b> ). .....                                                                             | 44 |
| <b>Figure S67.</b> The $^1\text{H}$ - $^1\text{H}$ COSY spectrum of $4\beta$ -crotignoid K ( <b>14</b> ). .....                                                 | 44 |
| <b>Figure S69.</b> The NOESY spectrum of $4\beta$ -crotignoid K ( <b>14</b> ). .....                                                                            | 45 |
| <b>Figure S70.</b> The HR-ESI-MS spectra of $4\beta$ -crotignoid K ( <b>14</b> ). .....                                                                         | 46 |
| <b>Figure S71.</b> The $^1\text{H}$ -NMR spectrum of euphodendriane B ( <b>15</b> ) (500 MHz, $\text{CDCl}_3$ ). .....                                          | 47 |
| <b>Figure S72.</b> The $^{13}\text{C}$ -JMOD spectrum of euphodendriane B ( <b>15</b> ) (125 MHz, $\text{CDCl}_3$ ). .....                                      | 47 |
| <b>Figure S73.</b> The HSQC spectrum of euphodendriane B ( <b>15</b> ). .....                                                                                   | 48 |
| <b>Figure S74.</b> The $^1\text{H}$ - $^1\text{H}$ COSY spectrum of euphodendriane B ( <b>15</b> ). .....                                                       | 48 |
| <b>Figure S75.</b> The HMBC spectrum of euphodendriane B ( <b>15</b> ). .....                                                                                   | 49 |
| <b>Figure S76.</b> The NOESY spectrum of euphodendriane B ( <b>15</b> ). .....                                                                                  | 49 |
| <b>Figure S77.</b> The HR-ESI-MS spectra of euphodendriane B ( <b>15</b> ). .....                                                                               | 50 |
| <b>Figure S78.</b> The $^1\text{H}$ -NMR spectrum of 16-nor-abieta-8,11,13-trien-3,7,15-trione ( <b>16</b> ) (500 MHz, $\text{CDCl}_3$ ). .....                 | 51 |
| <b>Figure S79.</b> The $^{13}\text{C}$ -JMOD spectrum of 16-nor-abieta-8,11,13-trien-3,7,15-trione ( <b>16</b> ) (125 MHz, $\text{CDCl}_3$ ). .....             | 51 |
| <b>Figure S80.</b> The HSQC spectrum of 16-nor-abieta-8,11,13-trien-3,7,15-trione ( <b>16</b> ). .....                                                          | 52 |
| <b>Figure S81.</b> The $^1\text{H}$ - $^1\text{H}$ COSY spectrum of 16-nor-abieta-8,11,13-trien-3,7,15-trione ( <b>16</b> ). .....                              | 52 |
| <b>Figure S82.</b> The HMBC spectrum of 16-nor-abieta-8,11,13-trien-3,7,15-trione ( <b>16</b> ). .....                                                          | 53 |
| <b>Figure S83.</b> The NOESY spectrum of 16-nor-abieta-8,11,13-trien-3,7,15-trione ( <b>16</b> ). .....                                                         | 53 |
| <b>Figure S84.</b> The HR-ESI-MS spectra of 16-nor-abieta-8,11,13-trien-3,7,15-trione ( <b>16</b> ). .....                                                      | 54 |
| <b>Figure S85.</b> The $^1\text{H}$ -NMR spectrum of 16-nor- $3\beta$ -hydroxy-abieta-8,11,13-trien-7,15-dione ( <b>17</b> ) (500 MHz, $\text{CDCl}_3$ ). ..... | 55 |



|                                                                                                                                                                                           |    |
|-------------------------------------------------------------------------------------------------------------------------------------------------------------------------------------------|----|
| <b>Figure S86.</b> The $^{13}\text{C}$ -JMOD spectrum of 16-nor-3 $\beta$ -hydroxy-abieta-8,11,13-trien-7,15-dione (17) (125 MHz, $\text{CDCl}_3$ ).....                                  | 55 |
| <b>Figure S87.</b> The HSQC spectrum of 16-nor-3 $\beta$ -hydroxy-abieta-8,11,13-trien-7,15-dione (17)..                                                                                  | 56 |
| <b>Figure S88.</b> The $^1\text{H}$ - $^1\text{H}$ COSY spectrum of 16-nor-3 $\beta$ -hydroxy-abieta-8,11,13-trien-7,15-dione (17).....                                                   | 56 |
| <b>Figure S89.</b> The HMBC spectrum of 16-nor-3 $\beta$ -hydroxy-abieta-8,11,13-trien-7,15-dione (17).                                                                                   | 57 |
| <b>Figure S90.</b> The NOESY spectrum of 16-nor-3 $\beta$ -hydroxy-abieta-8,11,13-trien-7,15-dione (17).                                                                                  | 57 |
| <b>Figure S91.</b> The HR-ESI-MS spectra of 16-nor-3 $\beta$ -hydroxy-abieta-8,11,13-trien-7,15-dione (17).<br>.....                                                                      | 58 |
| <b>Figure S92.</b> The $^1\text{H}$ -NMR spectrum of <i>ent</i> -8 $\beta$ ,14 $\beta$ -epoxyabieta-3-one-11,13(15)-dien-16,12-olide (19) (500 MHz, $\text{CDCl}_3$ ). ....               | 59 |
| <b>Figure S93.</b> The $^{13}\text{C}$ -JMOD spectrum of <i>ent</i> -8 $\beta$ ,14 $\beta$ -epoxyabieta-3-one-11,13(15)-dien-16,12-olide (19) (125 MHz, $\text{CDCl}_3$ ). ....           | 59 |
| <b>Figure S94.</b> The HSQC spectrum of <i>ent</i> -8 $\beta$ ,14 $\beta$ -epoxyabieta-3-one-11,13(15)-dien-16,12-olide (19).....                                                         | 60 |
| <b>Figure S95.</b> The $^1\text{H}$ - $^1\text{H}$ COSY spectrum of <i>ent</i> -8 $\beta$ ,14 $\beta$ -epoxyabieta-3-one-11,13(15)-dien-16,12-olide (19). ....                            | 60 |
| <b>Figure S96.</b> The HMBC spectrum of <i>ent</i> -8 $\beta$ ,14 $\beta$ -epoxyabieta-3-one-11,13(15)-dien-16,12-olide (19).....                                                         | 61 |
| <b>Figure S97.</b> The NOESY spectrum of <i>ent</i> -8 $\beta$ ,14 $\beta$ -epoxyabieta-3-one-11,13(15)-dien-16,12-olide (19).....                                                        | 61 |
| <b>Figure S98.</b> The HR-ESI-MS spectra of <i>ent</i> -8 $\beta$ ,14 $\beta$ -epoxyabieta-3-one-11,13(15)-dien-16,12-olide (19). ....                                                    | 62 |
| <b>Figure S99.</b> The $^1\text{H}$ -NMR spectrum of <i>ent</i> -8 $\beta$ ,14 $\beta$ -epoxyabieta-3 $\alpha$ -hydroxy-13(15)-en-16,12-olide (20) (500 MHz, $\text{CDCl}_3$ ). ....      | 63 |
| <b>Figure S100.</b> The $^{13}\text{C}$ -JMOD spectrum of <i>ent</i> -8 $\beta$ ,14 $\beta$ -epoxyabieta-3 $\alpha$ -hydroxy-13(15)-en-16,12-olide (20) (125 MHz, $\text{CDCl}_3$ ). .... | 63 |
| <b>Figure S101.</b> The HSQC spectrum of <i>ent</i> -8 $\beta$ ,14 $\beta$ -epoxyabieta-3 $\alpha$ -hydroxy-13(15)-en-16,12-olide (20).....                                               | 64 |

|                                                                                                                                                                                  |    |
|----------------------------------------------------------------------------------------------------------------------------------------------------------------------------------|----|
| <b>Figure S102.</b> The $^1\text{H}$ - $^1\text{H}$ COSY spectrum of <i>ent</i> -8 $\beta$ ,14 $\beta$ -epoxyabieta-3 $\alpha$ -hydroxy-13(15)-en-16,12-olide ( <b>20</b> )..... | 64 |
| <b>Figure S103.</b> The HMBC spectrum of <i>ent</i> -8 $\beta$ ,14 $\beta$ -epoxyabieta-3 $\alpha$ -hydroxy-13(15)-en-16,12-olide ( <b>20</b> ). ....                            | 65 |
| <b>Figure S104.</b> The NOESY spectrum of <i>ent</i> -8 $\beta$ ,14 $\beta$ -epoxyabieta-3 $\alpha$ -hydroxy-13(15)-en-16,12-olide ( <b>20</b> ). ....                           | 65 |
| <b>Figure S105.</b> The HR-ESI-MS spectra of <i>ent</i> -8 $\beta$ ,14 $\beta$ -epoxyabieta-3 $\alpha$ -hydroxy-13(15)-en-16,12-olide ( <b>20</b> ). ....                        | 66 |
| <b>Figure S106.</b> 24 hours cell viability after exposure to the compounds <b>1</b> – <b>31</b> . ....                                                                          | 67 |

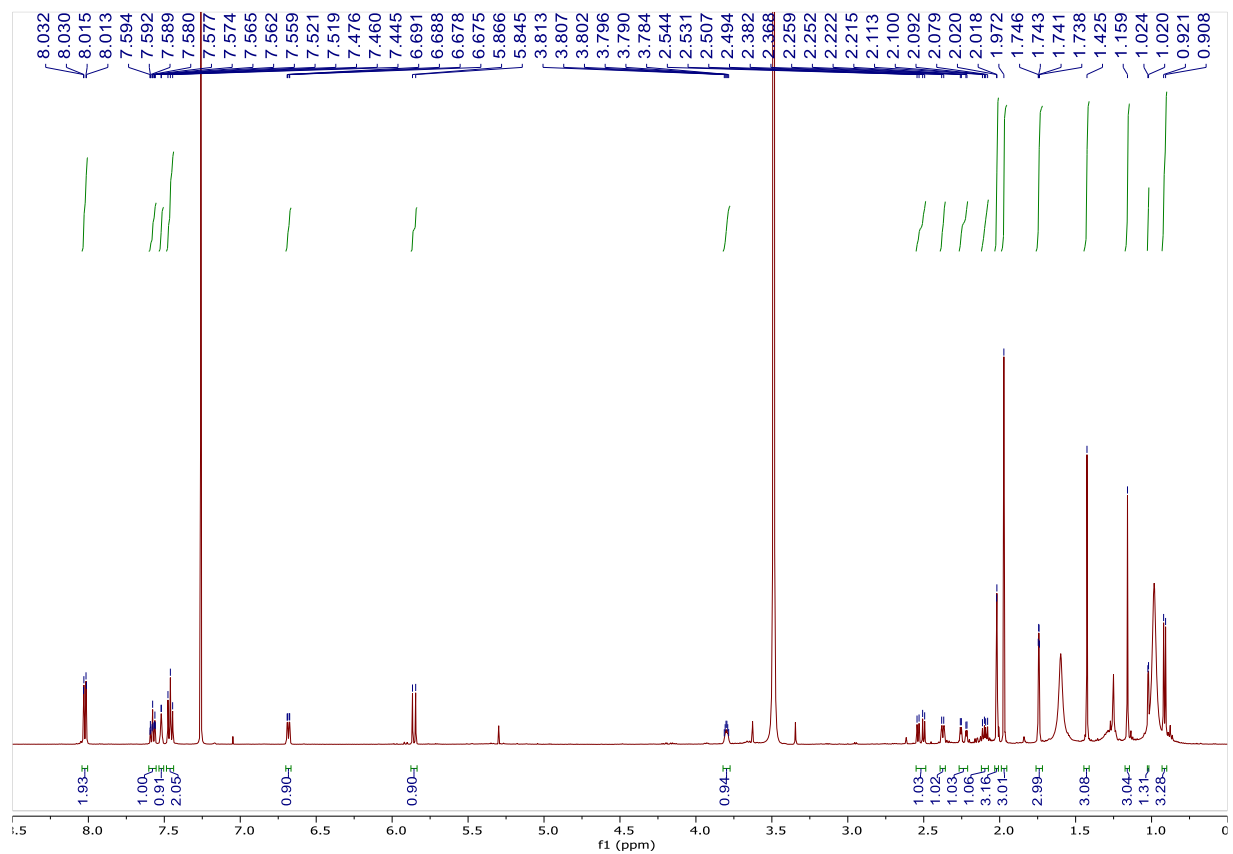

Figure S1. The  $^1\text{H}$ -NMR spectrum of euphordraculoate C (**1**) (500 MHz,  $\text{CDCl}_3$ ).

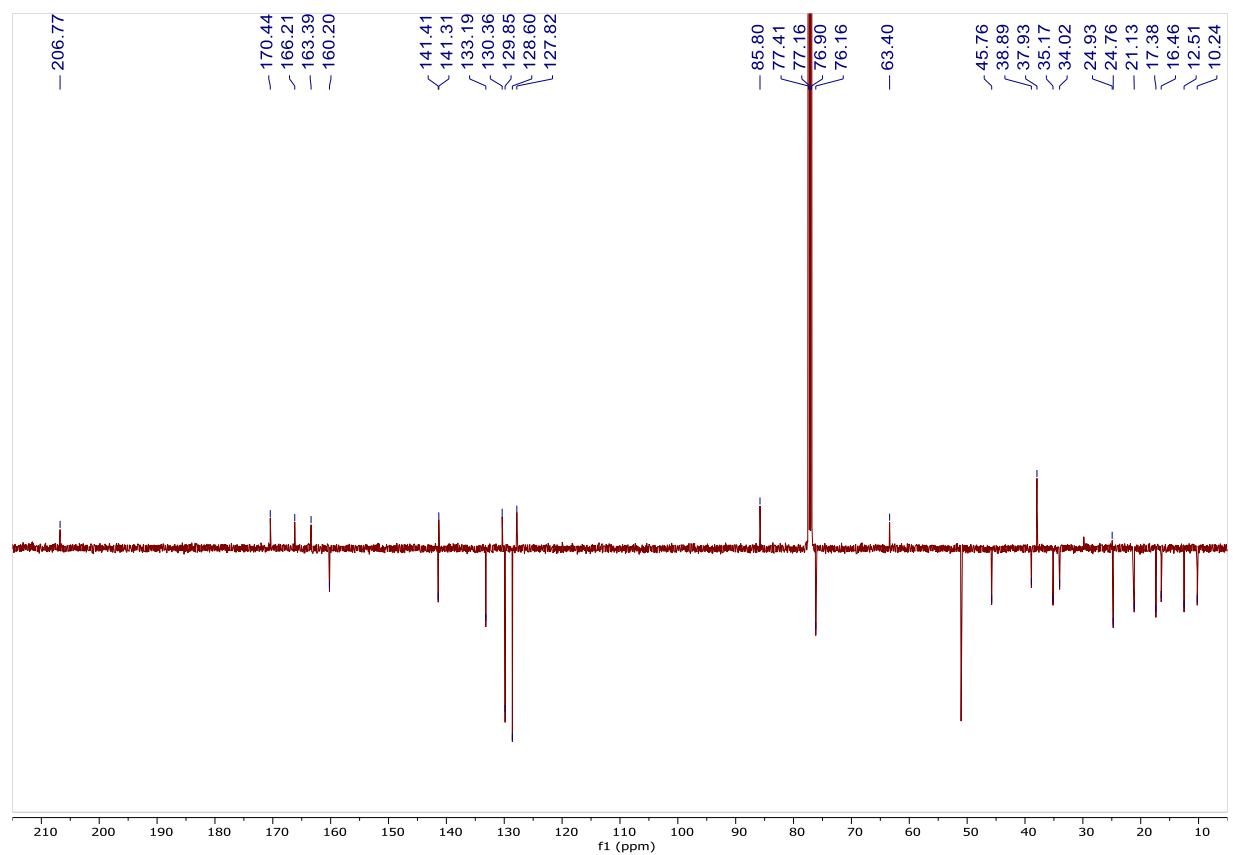

Figure S2. The  $^{13}\text{C}$ -JMOD spectrum of euphordraculoate C (**1**) (125 MHz,  $\text{CDCl}_3$ ).

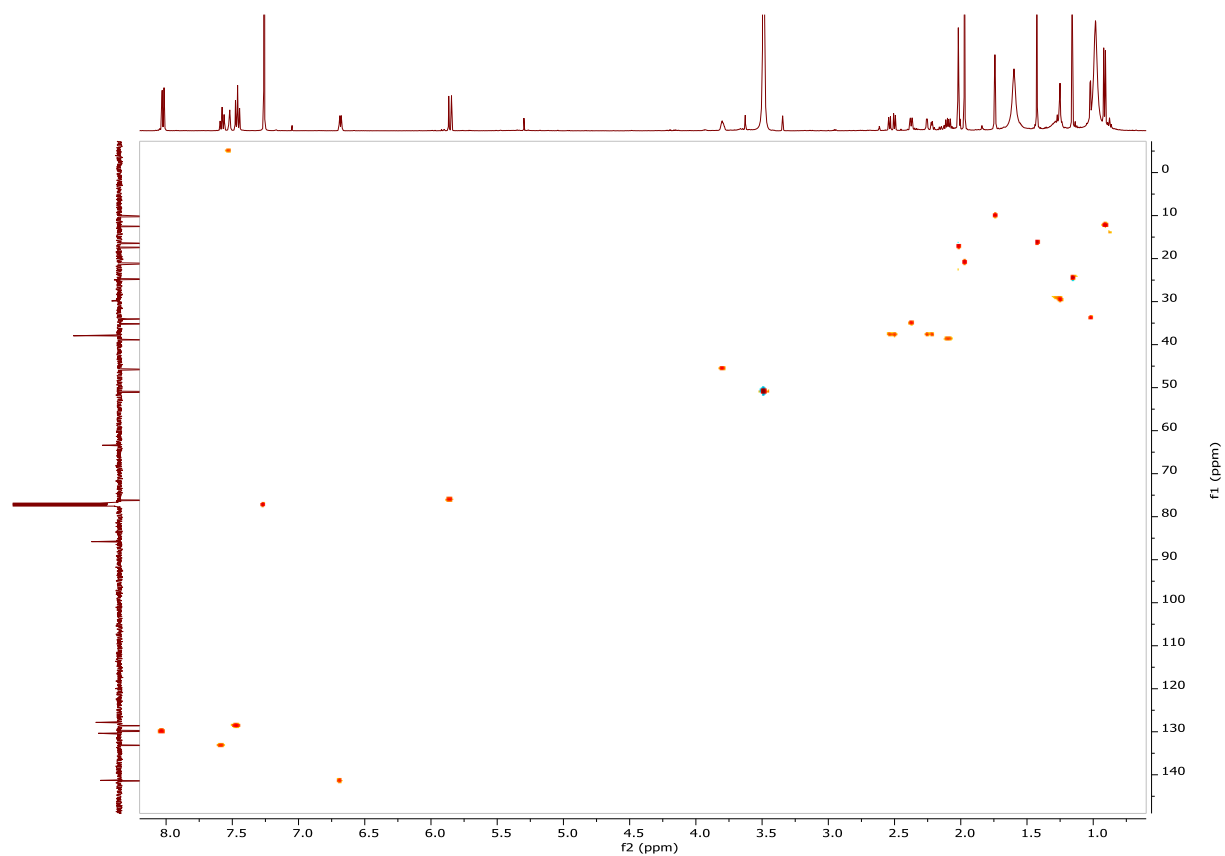

**Figure S3.** The HSQC spectrum of euphordraculoate C (**1**).

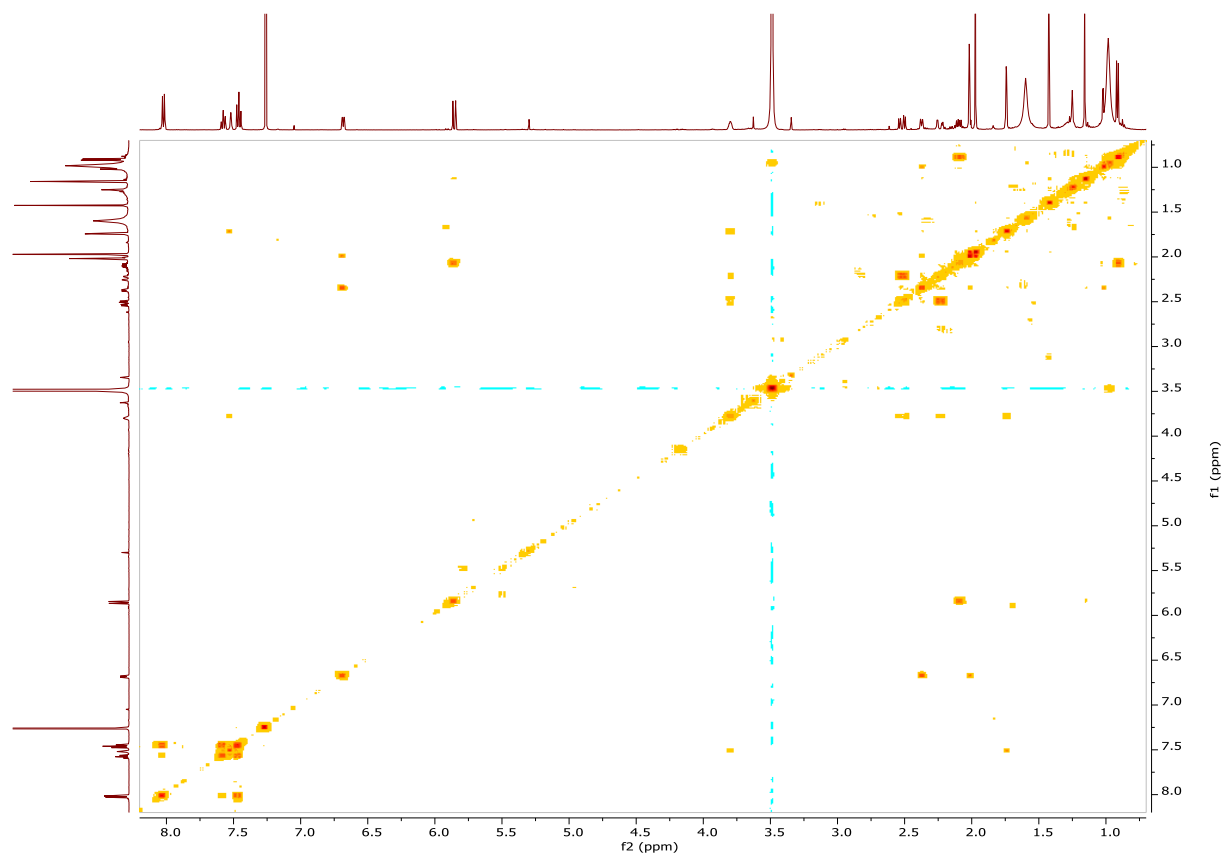

**Figure S4.** The  $^1\text{H}$ - $^1\text{H}$  COSY spectrum of euphordraculoate C (**1**).

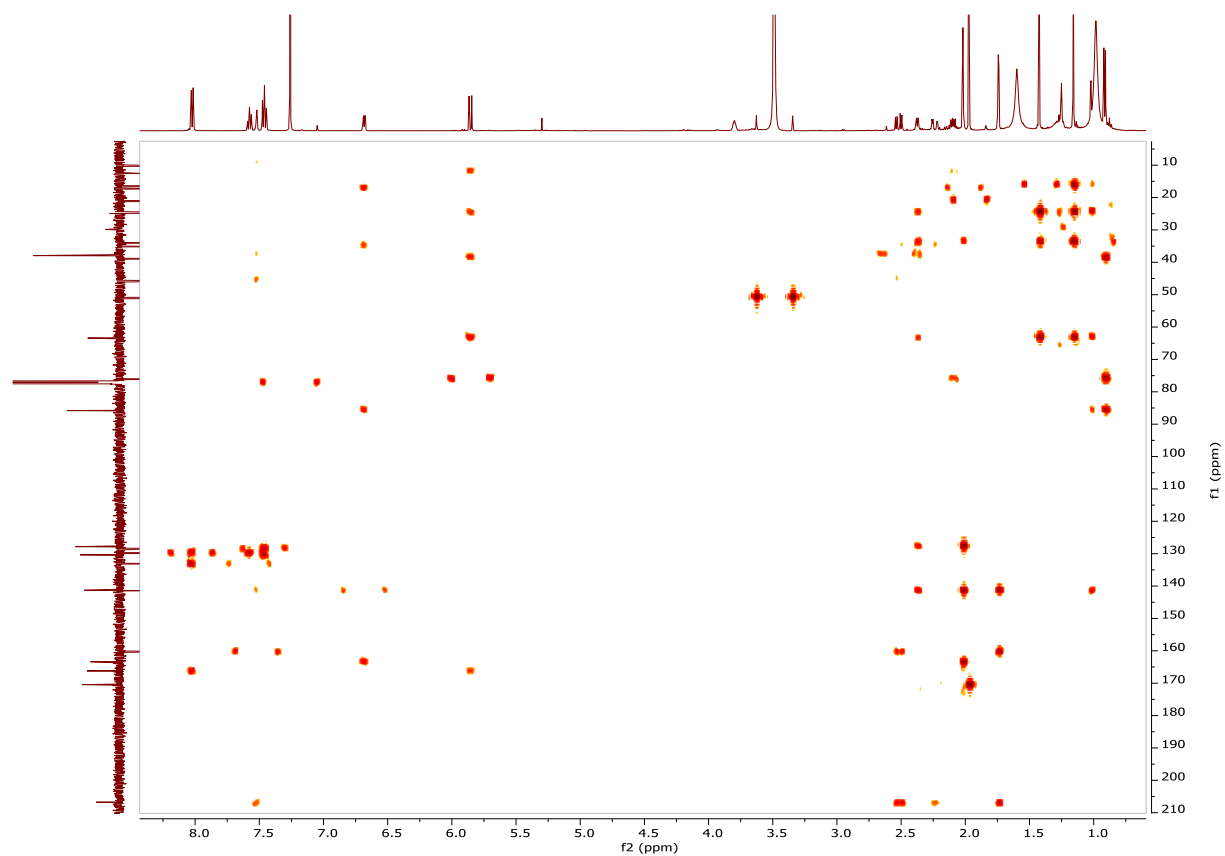

**Figure S5.** The HMBC spectrum of euphordraculoate C (**1**).

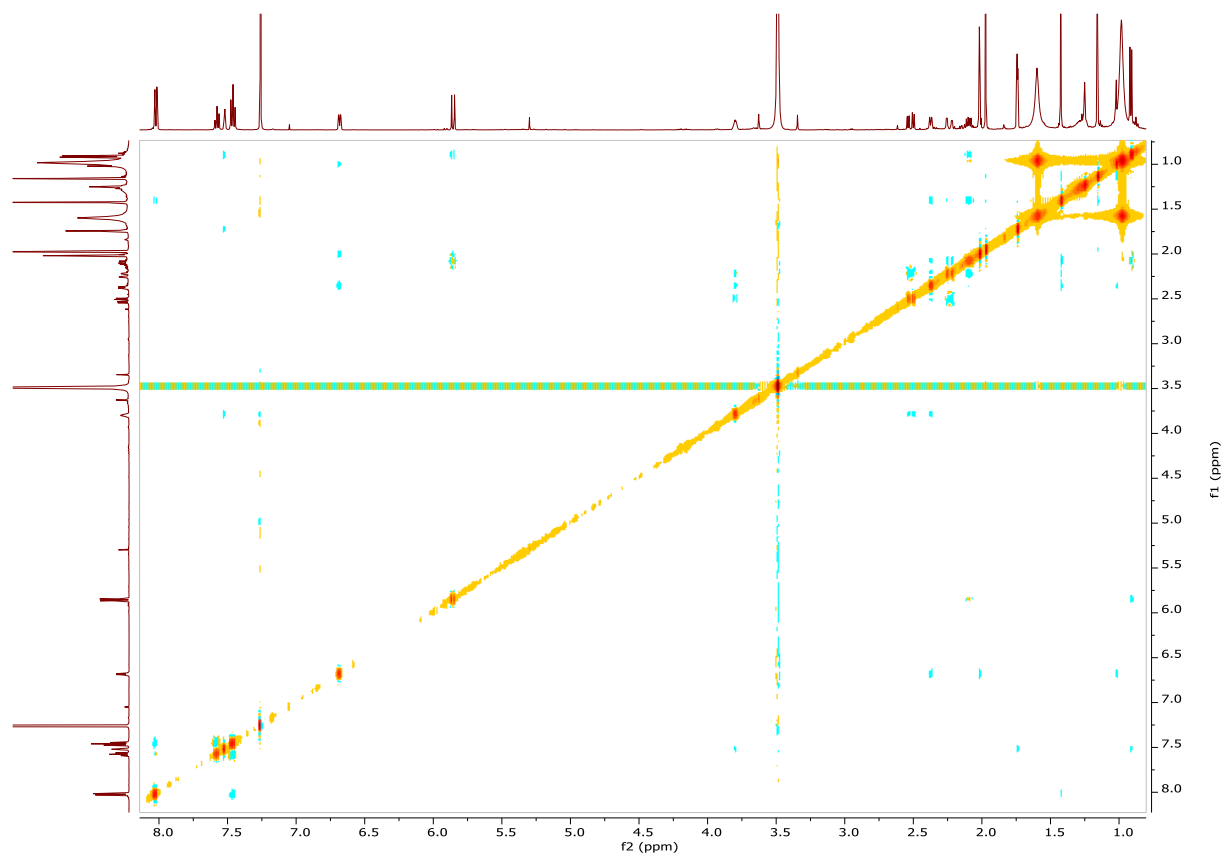

**Figure S6.** The NOESY spectrum of euphordraculoate C (**1**).

YC-20200917 #924-954 RT: 4.74-4.89 AV: 31 NL: 2.56E8  
T: FTMS + p ESI Full lock ms [100.0000-1000.0000]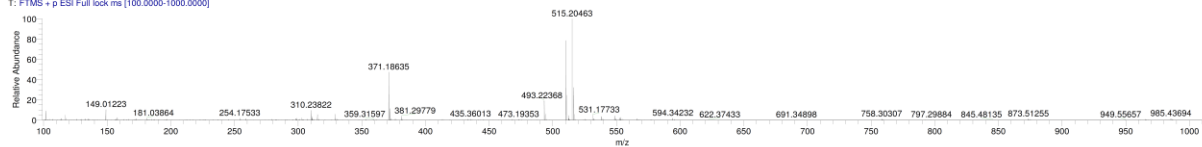YC-20200917 #924-954 RT: 4.74-4.89 AV: 31 NL: 4.92E7  
T: FTMS + p ESI Full lock ms [100.0000-1000.0000]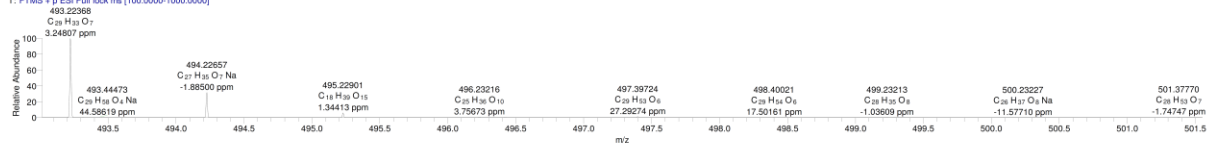YC-20200917 #924-954 RT: 4.74-4.89 AV: 31 NL: 2.56E8  
T: FTMS + p ESI Full lock ms [100.0000-1000.0000]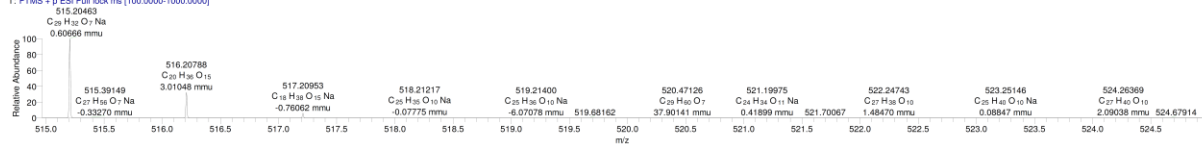

C29H32O7 +H: C29 H33 O7 p(gss, s/p:40) Chrg 1R: 70...

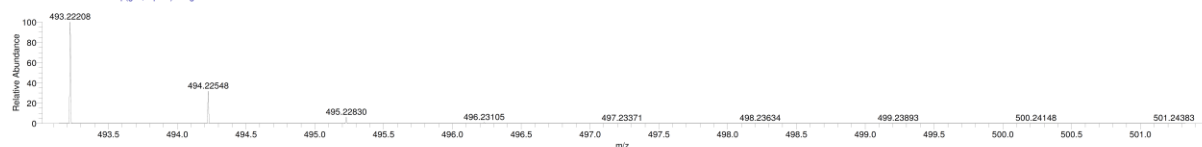

C29H32O7 +Na: C29 H32 O7 Na1 p(gss, s/p:40) Chrg 1...

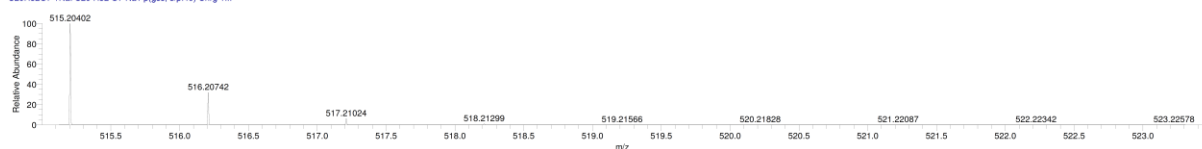

Figure S7. The HR-ESIMS spectra of euphordraculoate C (1).

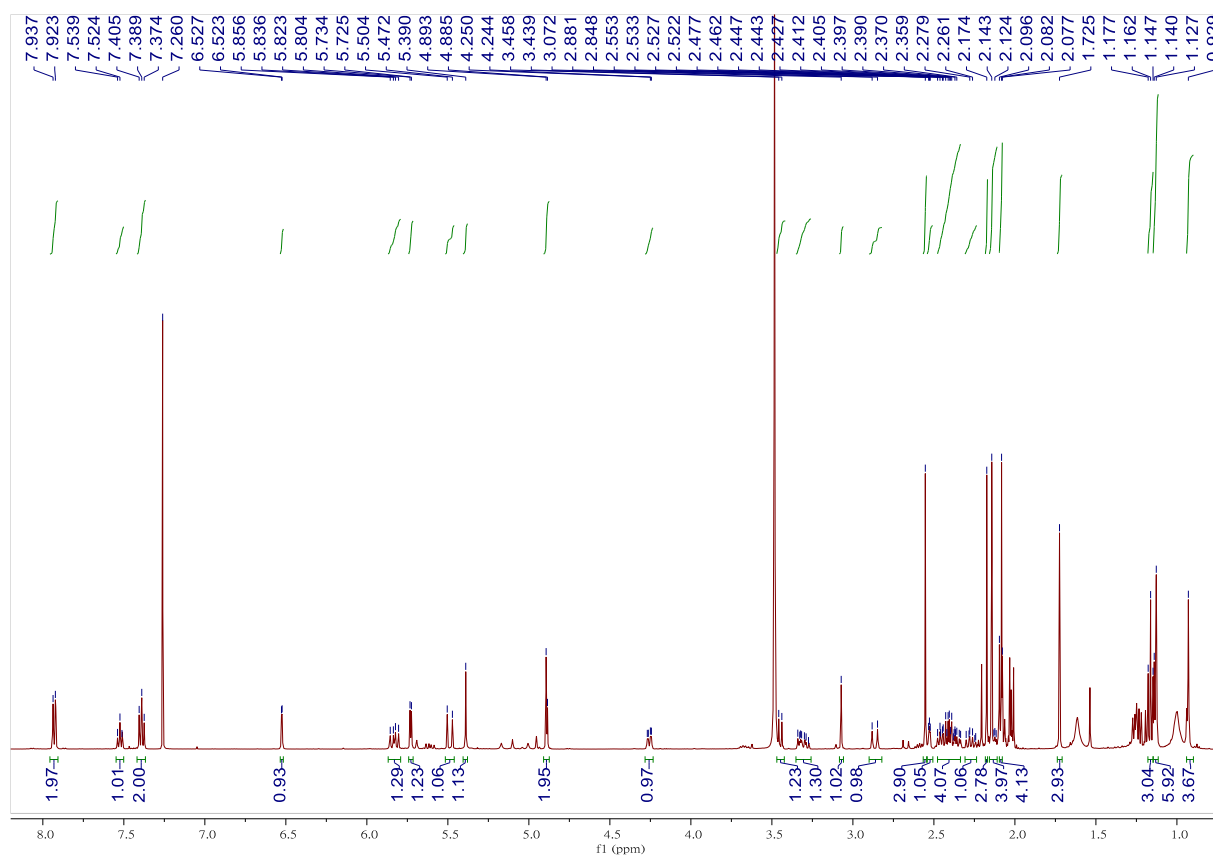

**Figure S8.** The <sup>1</sup>H-NMR spectrum of usambariphane A (2) (500 MHz, CDCl<sub>3</sub>).

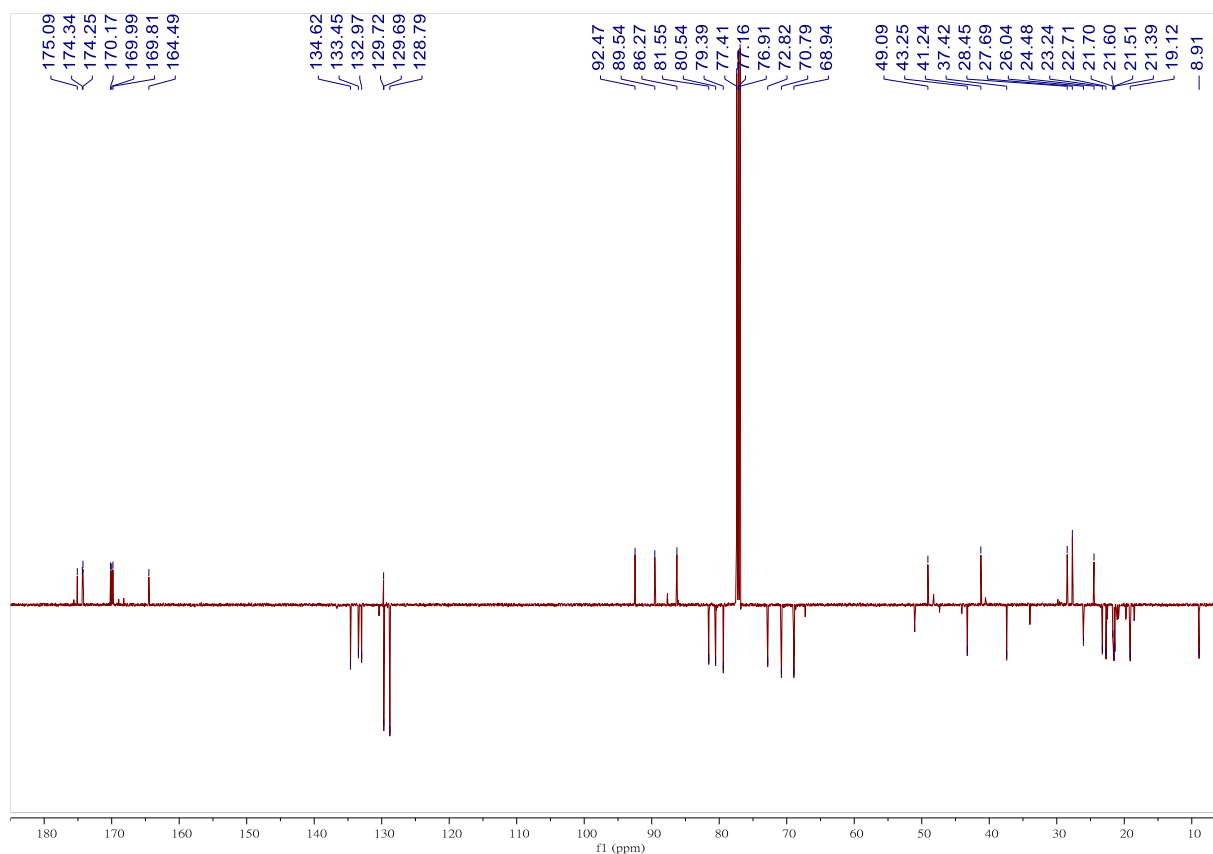

**Figure S9.** The <sup>13</sup>C-JMOD spectrum of usambariphane A (2) (125 MHz, CDCl<sub>3</sub>).

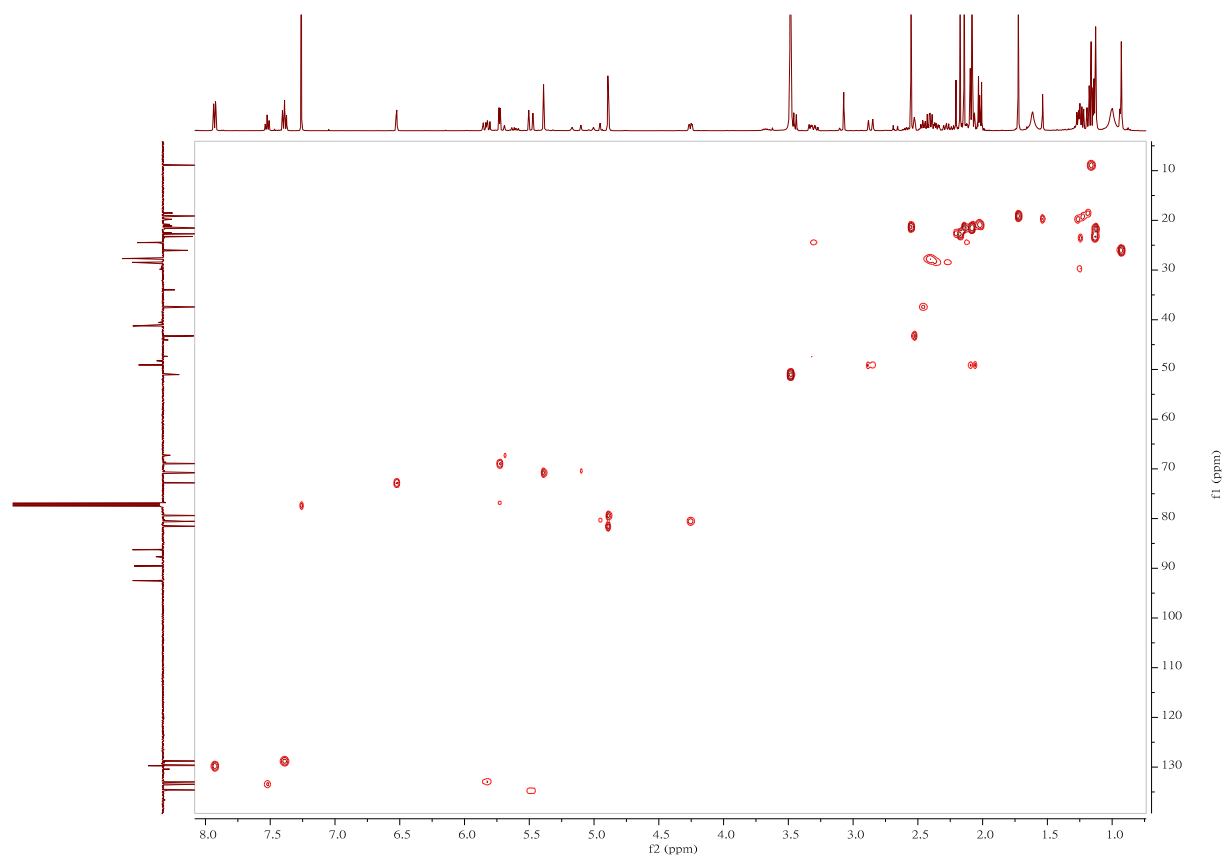

**Figure S10.** The HSQC spectrum of usambariphane A (2).

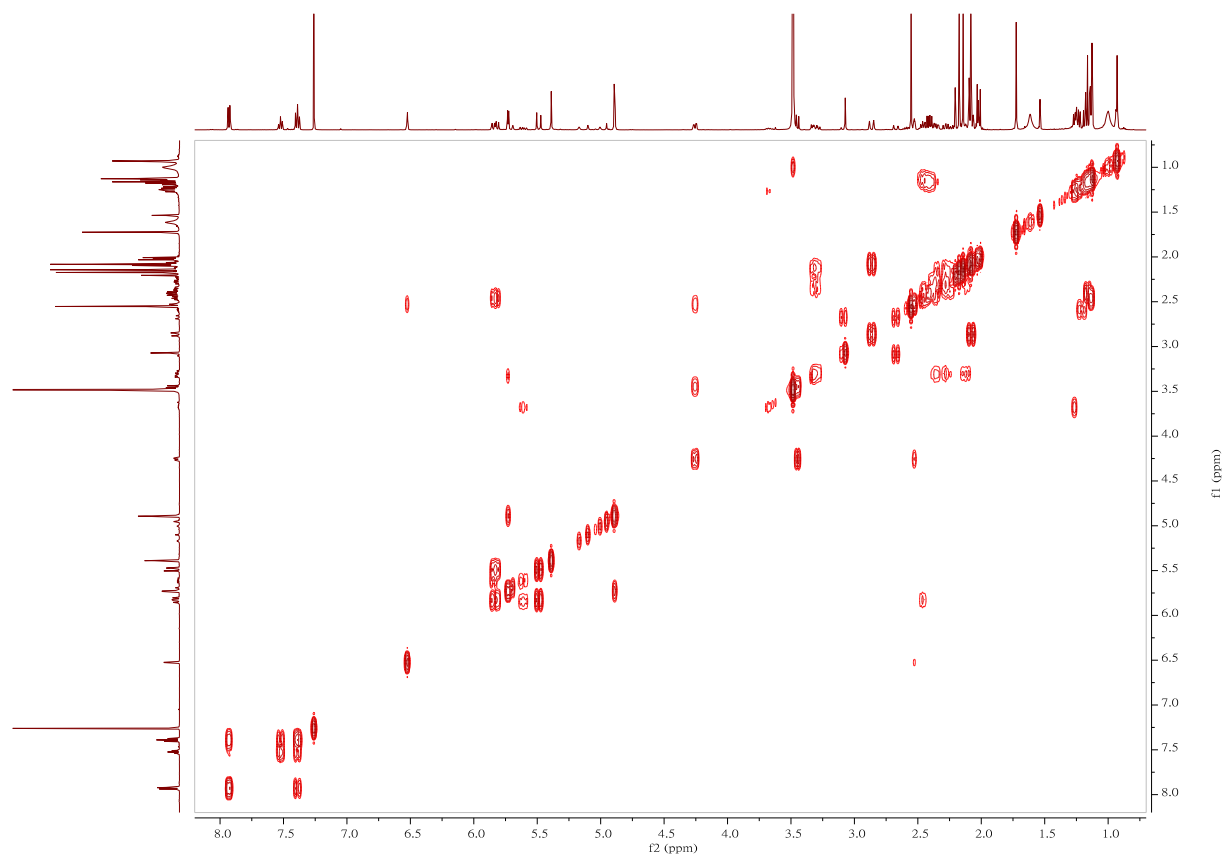

**Figure S11.** The  $^1\text{H}$ - $^1\text{H}$  COSY spectrum of usambariphane A (2).



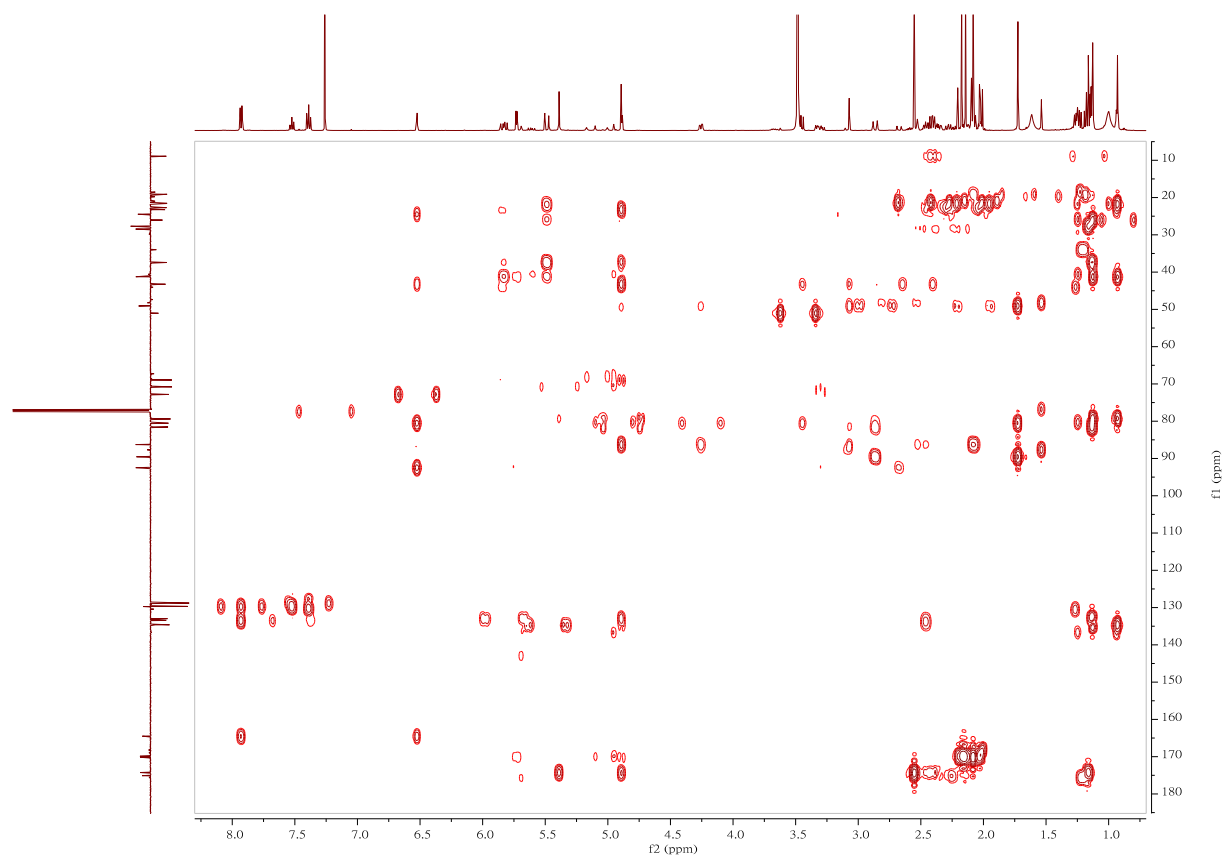

**Figure S12.** The HMBC spectrum of usambariphanes A (2).

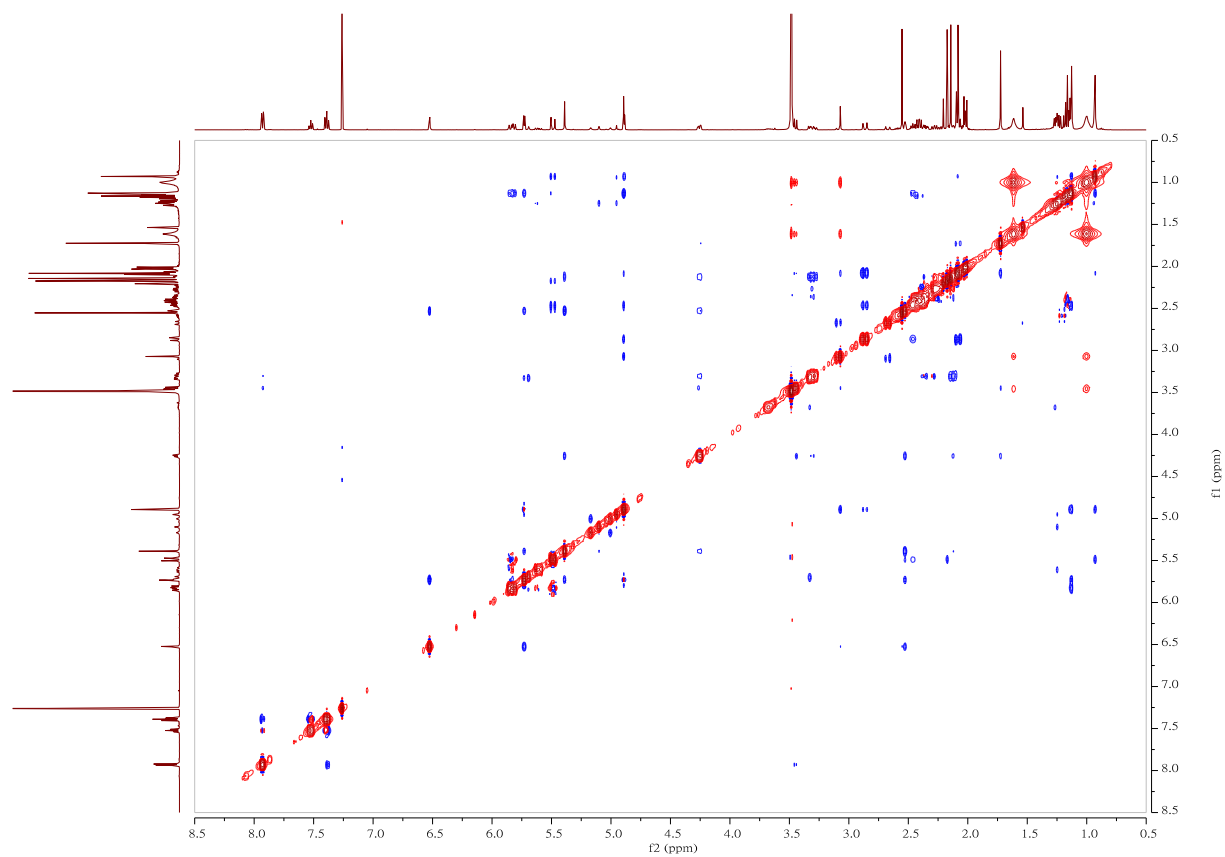

**Figure S13.** The NOESY spectrum of usambariphanes A (2).

YC-20200917 #1510-1540 RT: 7.75-7.91 AV: 31 NL: 1.67E8  
T: FTMS + p ESI Full lock ms [100.0000-1000.0000]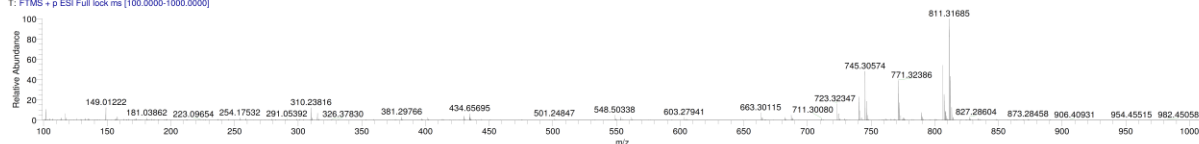YC-20200917 #1510-1540 RT: 7.75-7.91 AV: 31 NL: 1.28E7  
T: FTMS + p ESI Full lock ms [100.0000-1000.0000]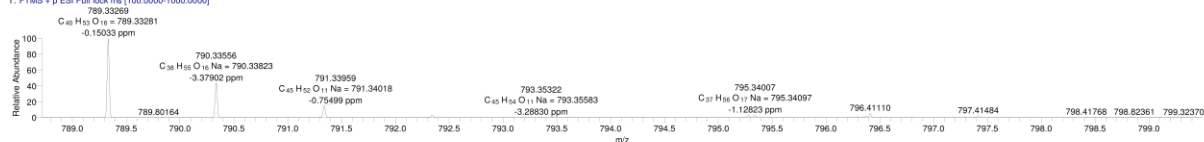YC-20200917 #1510-1540 RT: 7.75-7.91 AV: 31 NL: 1.67E8  
T: FTMS + p ESI Full lock ms [100.0000-1000.0000]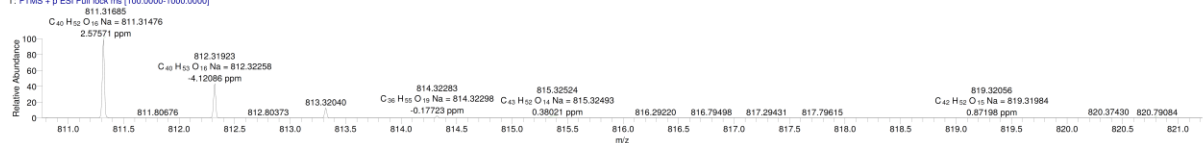

C40H52O16 +H: C40 H53 O16 p(gss, s/p:40) Chrg 1R: ...

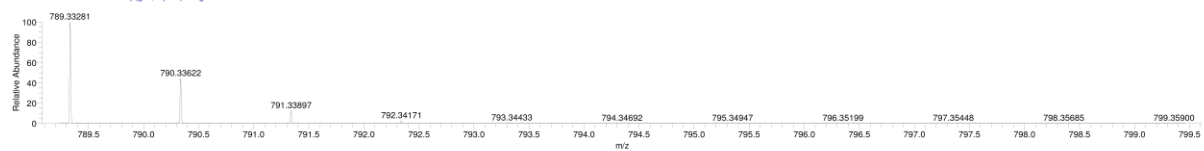

C40H52O16 +Na: C40 H52 O16 Na1 p(gss, s/p:40) Chrg 1: ...

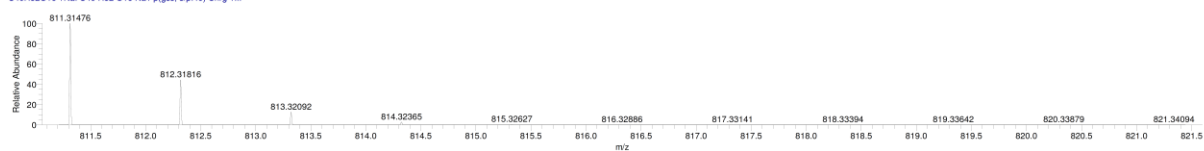

Figure S14. The HR-ESIMS spectra of usambariphane A (2).



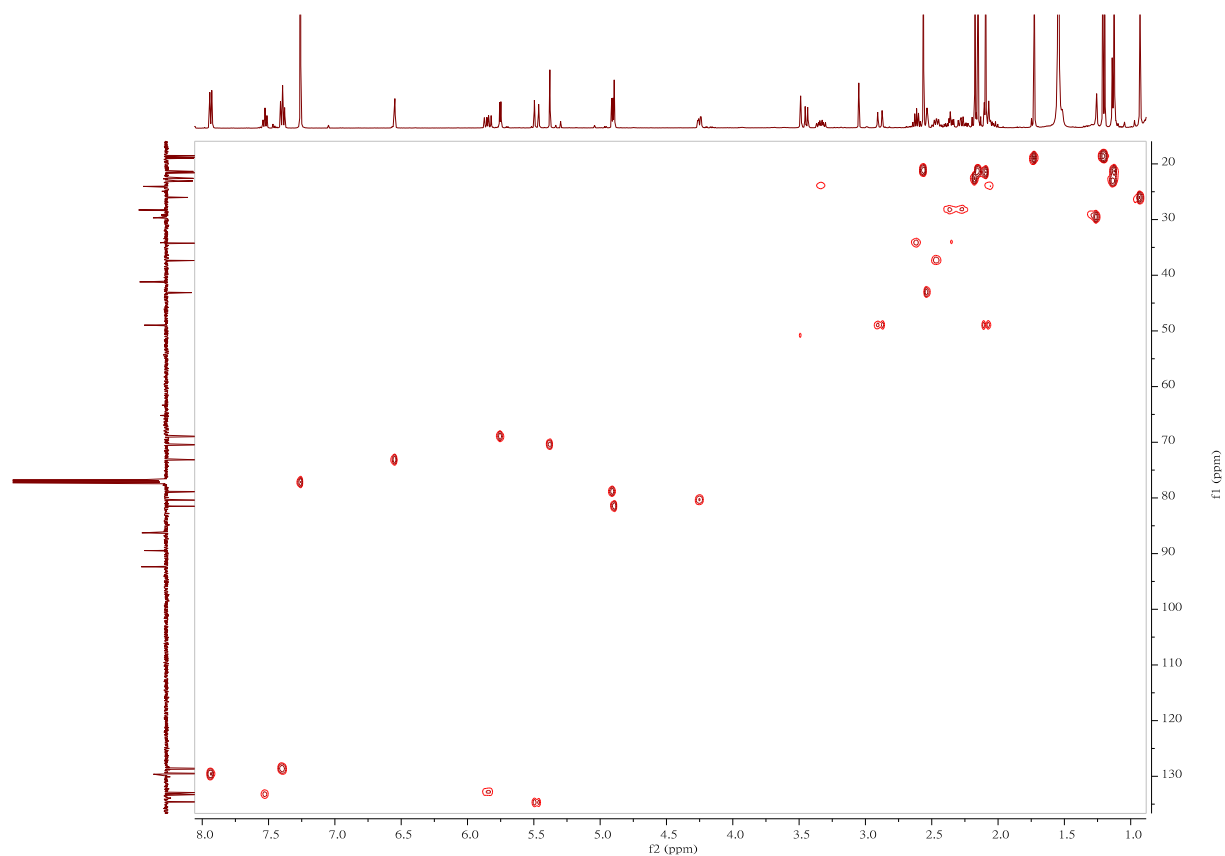

**Figure S17.** The HSQC spectrum of usambariphane B (3).

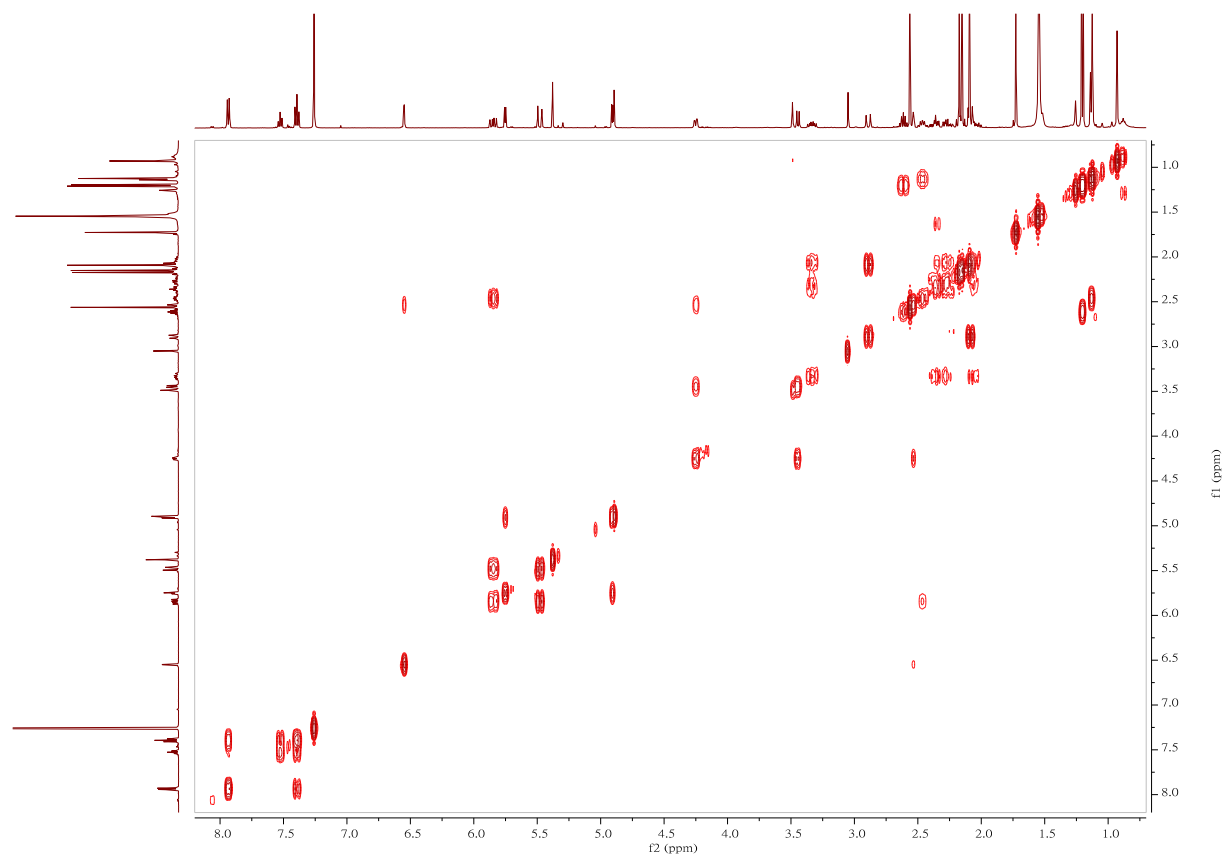

**Figure S18.** The  $^1\text{H}$ - $^1\text{H}$  COSY spectrum of usambariphane B (3).

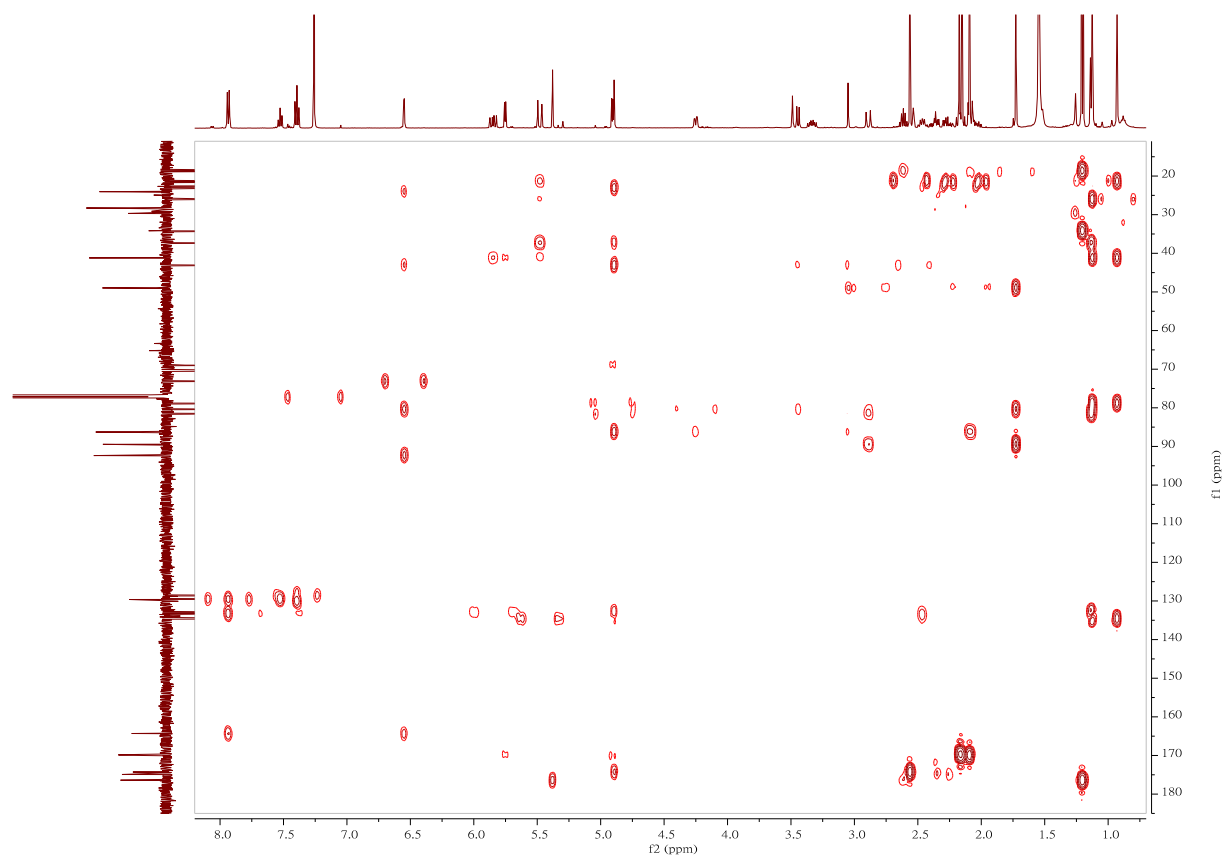

**Figure S19.** The HMBC spectrum of usambariphane B (**3**).

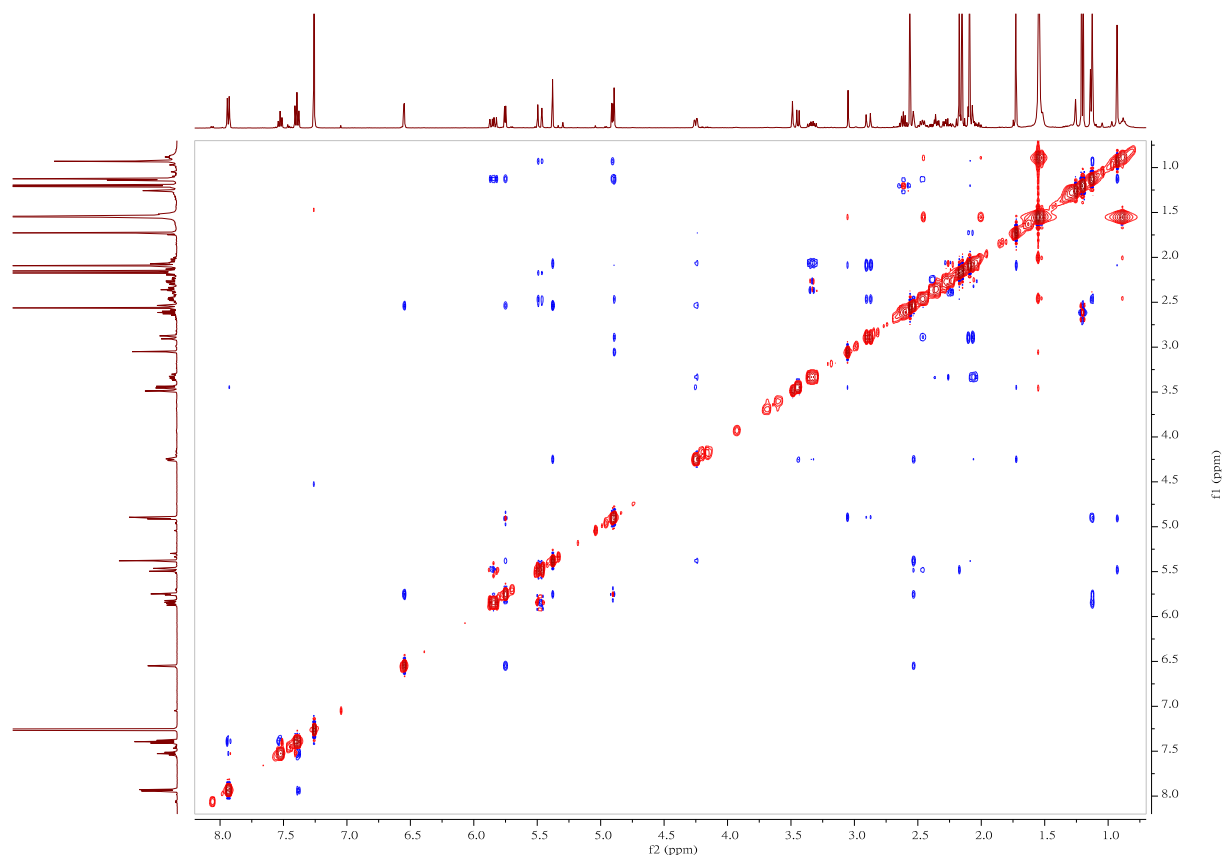

**Figure S20.** The NOESY spectrum of usambariphane B (**3**).

1-5, 11-14

YC-20200917 #4038-4064 RT: 20.74-20.87 AV: 27 NL: 2.64E8  
T: FTMS + p ESI Full lock ms [100.0000-1000.0000]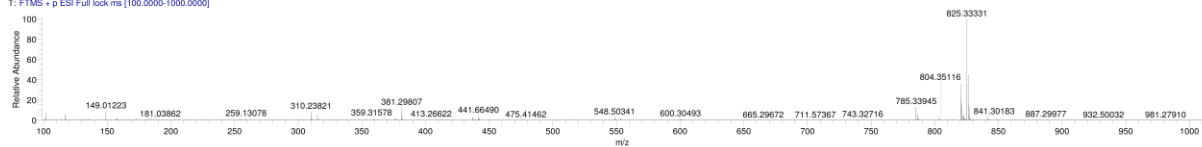YC-20200917 #4038-4064 RT: 20.74-20.87 AV: 27 NL: 7.31E8  
T: FTMS + p ESI Full lock ms [100.0000-1000.0000]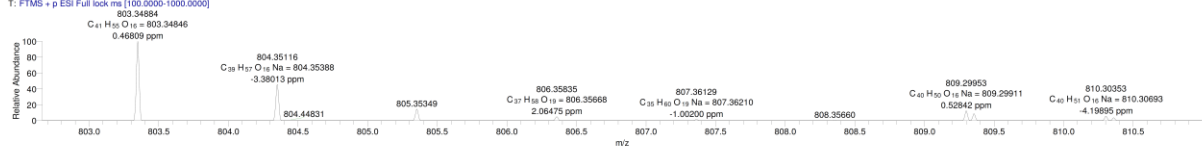YC-20200917 #4038-4064 RT: 20.74-20.87 AV: 27 NL: 2.64E8  
T: FTMS + p ESI Full lock ms [100.0000-1000.0000]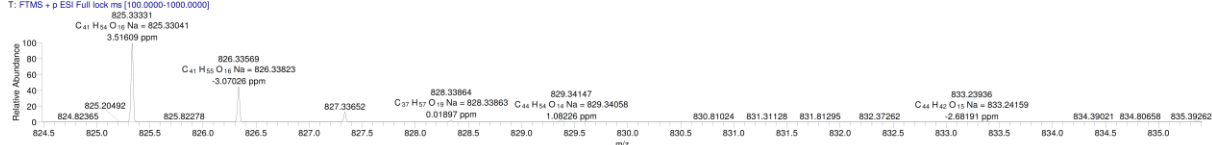

C41H54O16 +H: C41 H55 O16 p(gss, s/p:40) Chrg 1R: ...

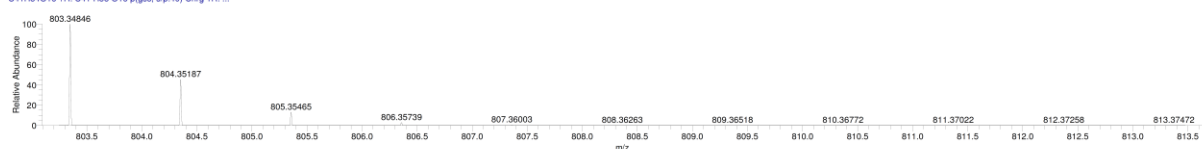

C41H54O16 +Na: C41 H54 O16 Na1 p(gss, s/p:40) Chrg 1: ...

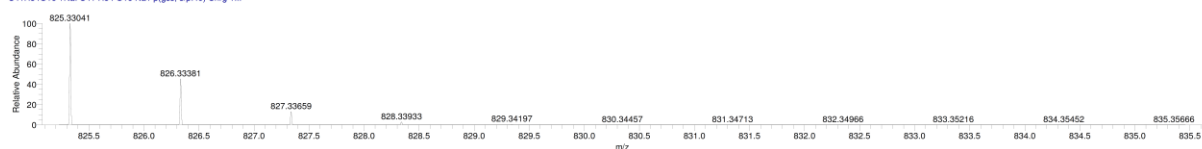

Figure S21. The HR-ESIMS spectra of usambariphane B (3).

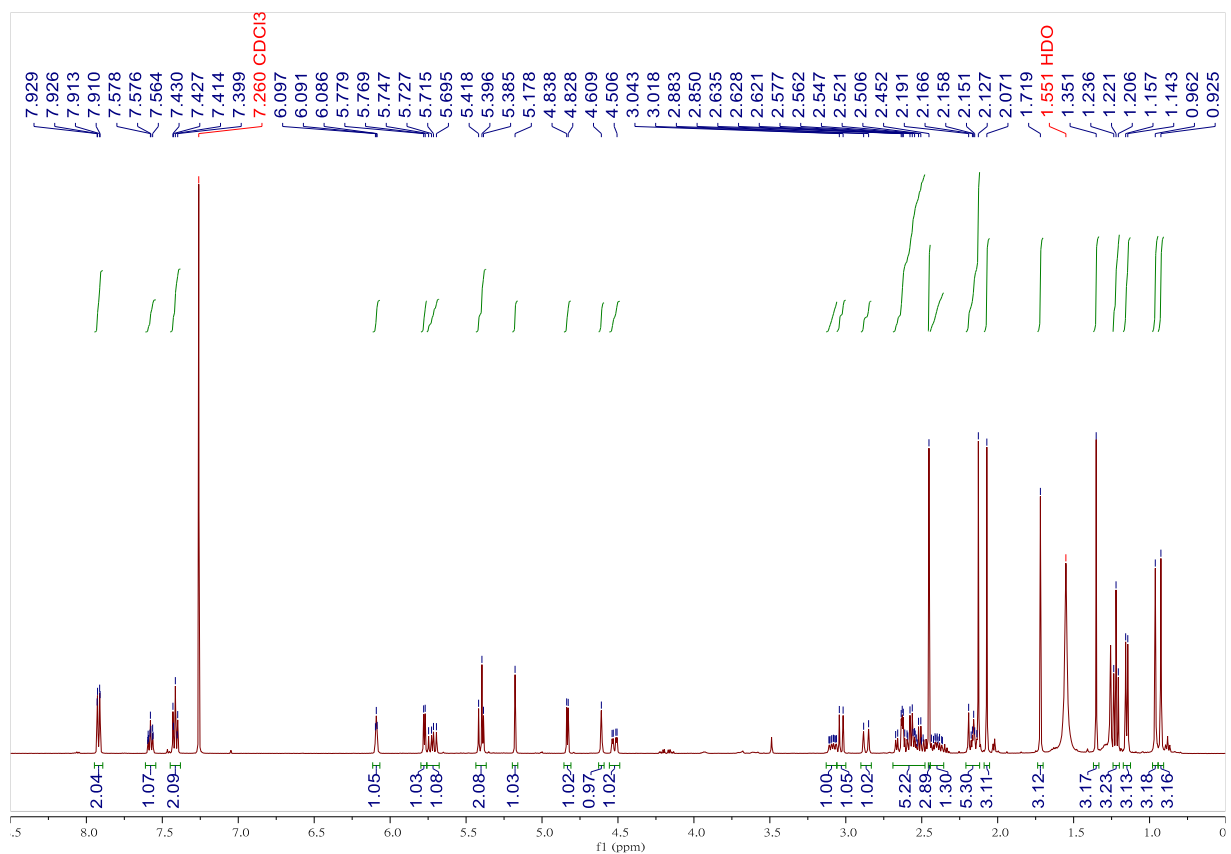

**Figure S22.** The <sup>1</sup>H-NMR spectrum of usambariphane C (**4**) (500 MHz, CDCl<sub>3</sub>).

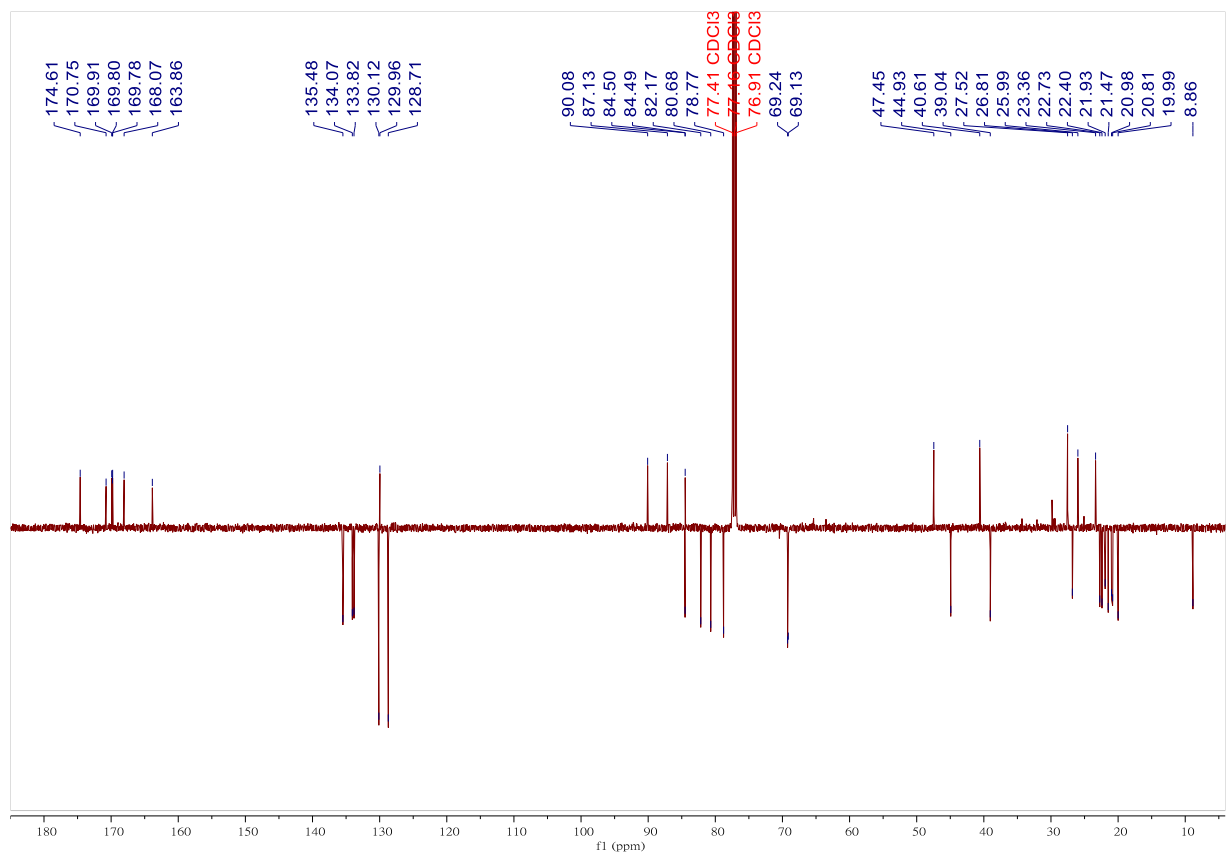

**Figure S23.** The <sup>13</sup>C-JMOD spectrum of usambariphane C (**4**) (125 MHz, CDCl<sub>3</sub>).

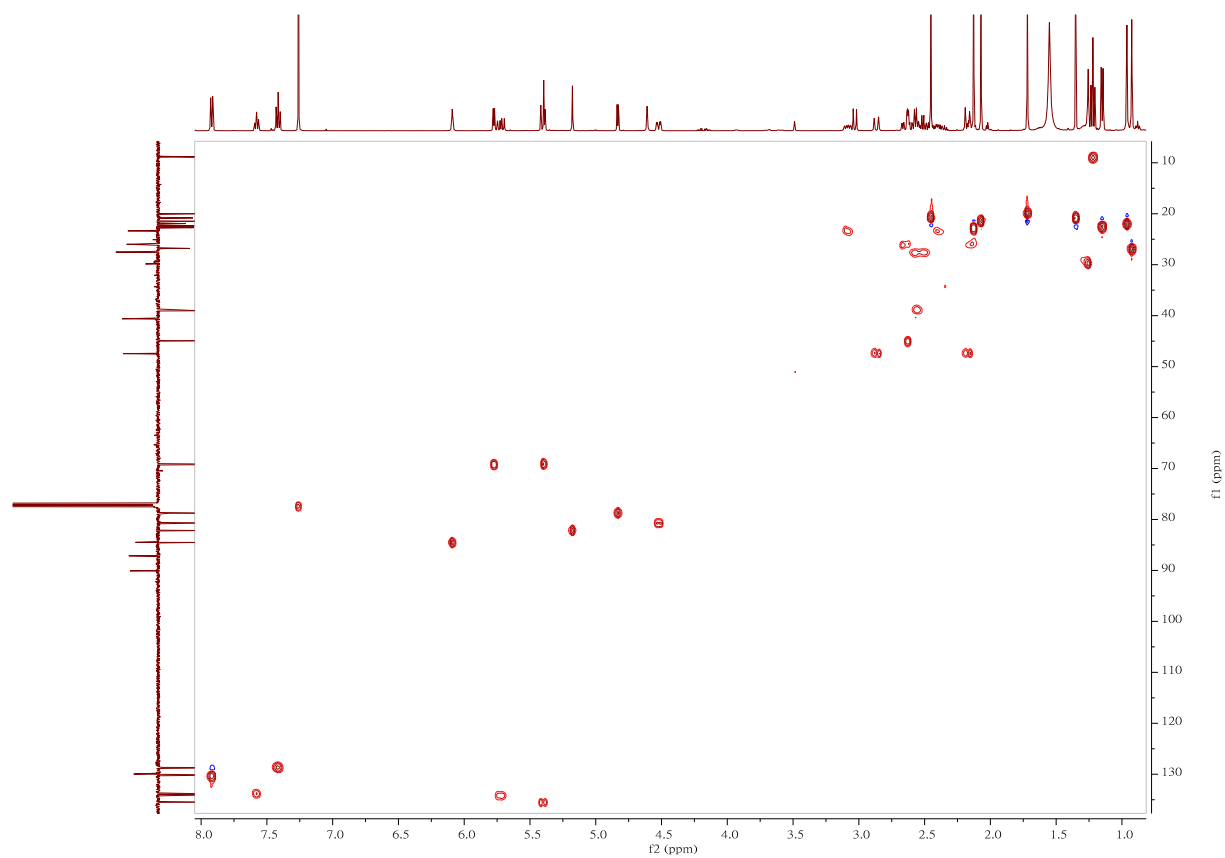

**Figure S24.** The HSQC spectrum of usambariphane C (**4**).

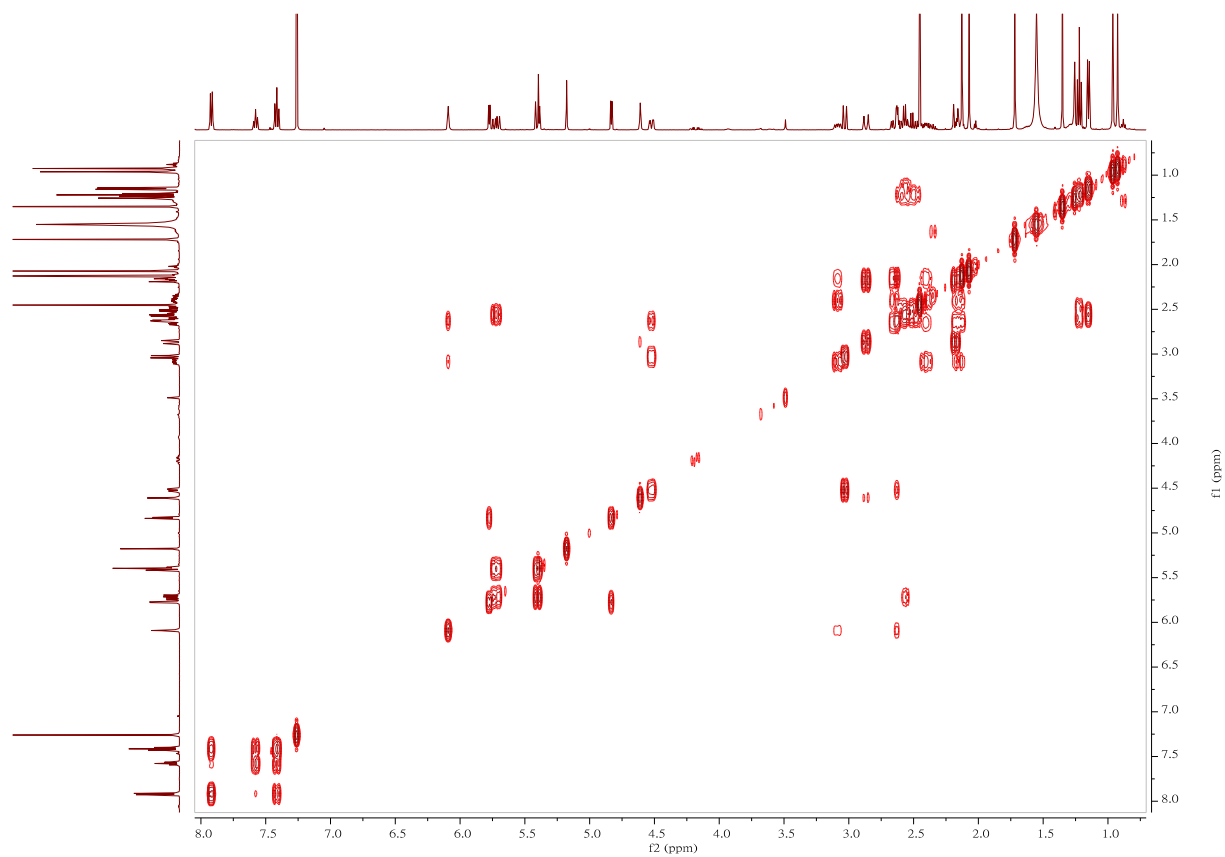

**Figure S25.** The  $^1\text{H}$ - $^1\text{H}$  COSY spectrum of usambariphane C (**4**).



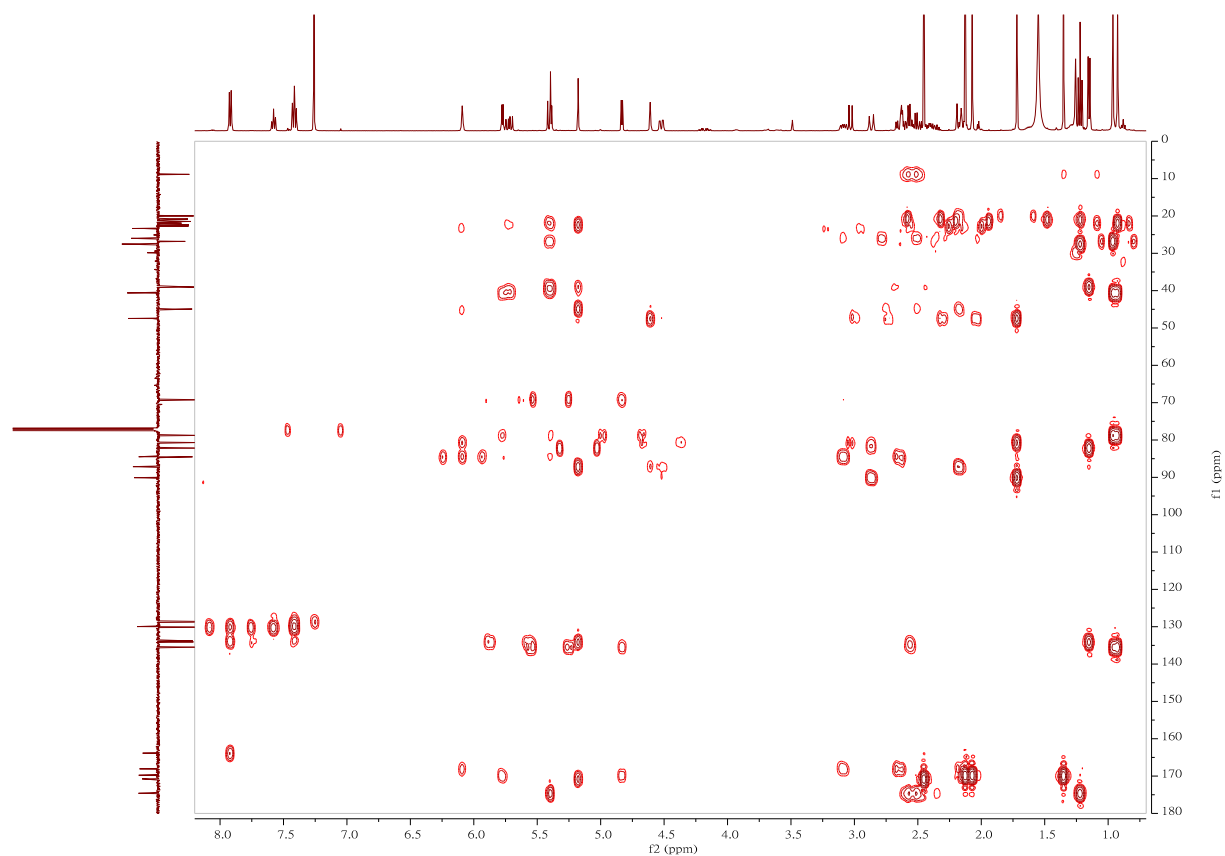

**Figure S26.** The HMBC spectrum of usambariphane C (4).

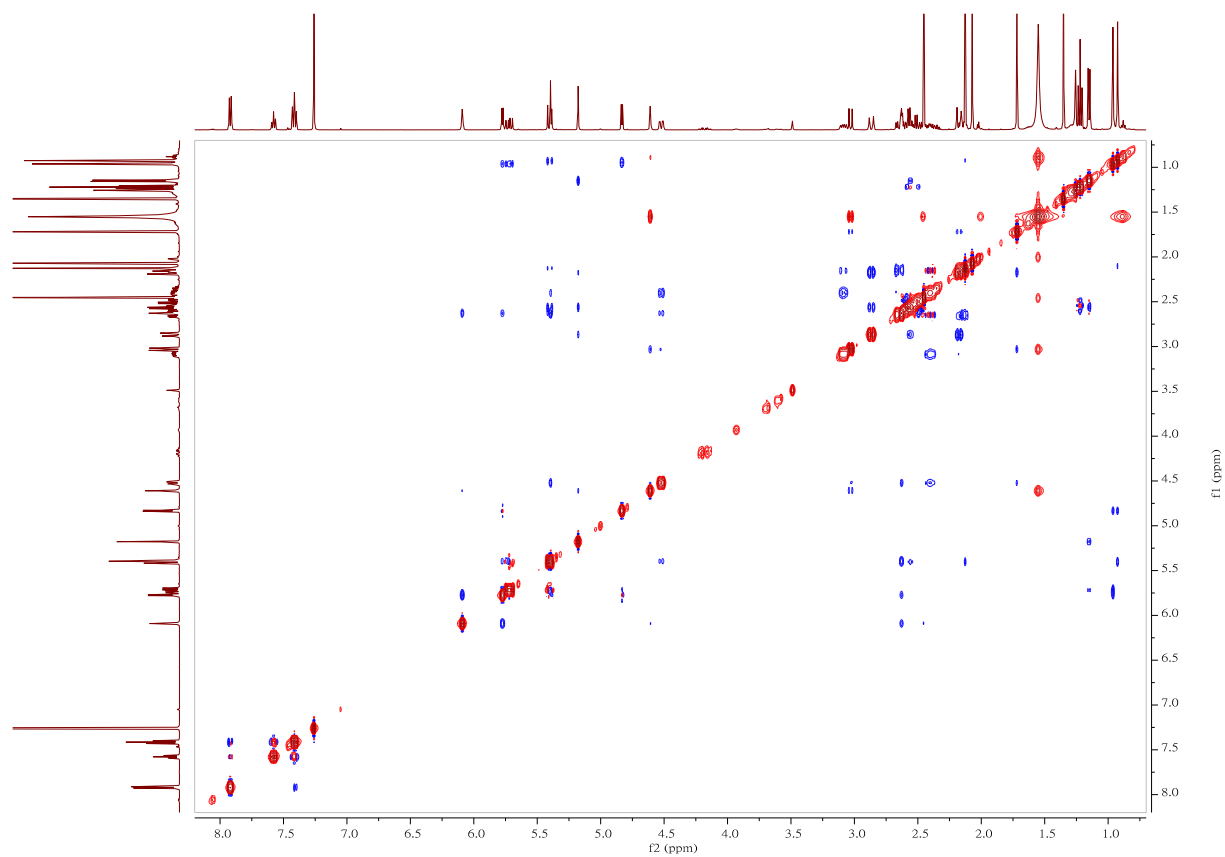

**Figure S27.** The NOESY spectrum of usambariphane C (4).

YC-20200917 #3798-3846 RT: 19.51-19.76 AV: 49 NL: 6.52E7  
T: FTMS + p ESI Full lock ms [100.0000-1000.0000]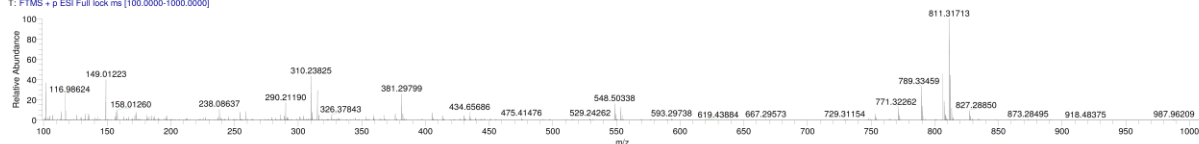YC-20200917 #3798-3846 RT: 19.51-19.76 AV: 49 NL: 2.17E7  
T: FTMS + p ESI Full lock ms [100.0000-1000.0000]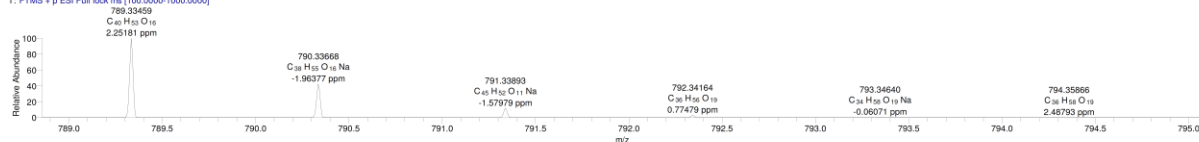YC-20200917 #3798-3846 RT: 19.51-19.76 AV: 49 NL: 6.52E7  
T: FTMS + p ESI Full lock ms [100.0000-1000.0000]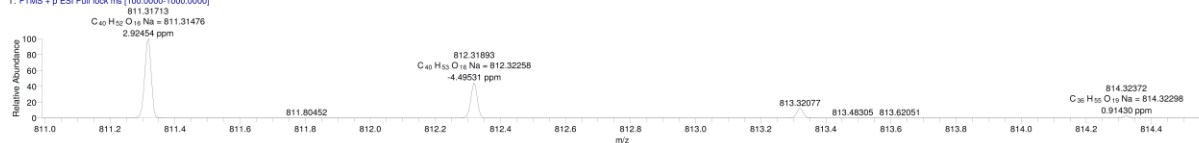

C40H52O16 +H: C40 H53 O16 p(gss, s/p:40) Chrg 1R: ...

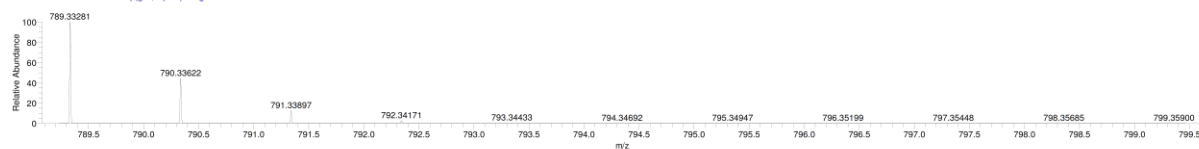

C40H52O16 +Na: C40 H52 O16 Na1 p(gss, s/p:40) Chrg 1R: ...

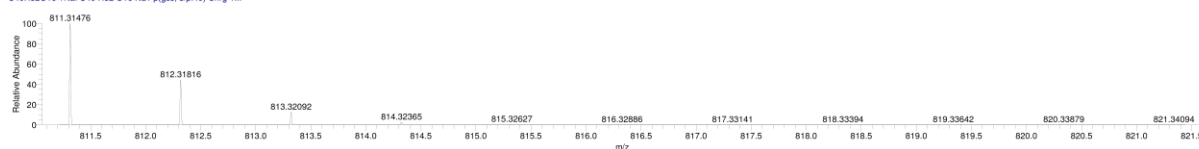

Figure S28. The HR-ESIMS spectra of usambariphane C (4).

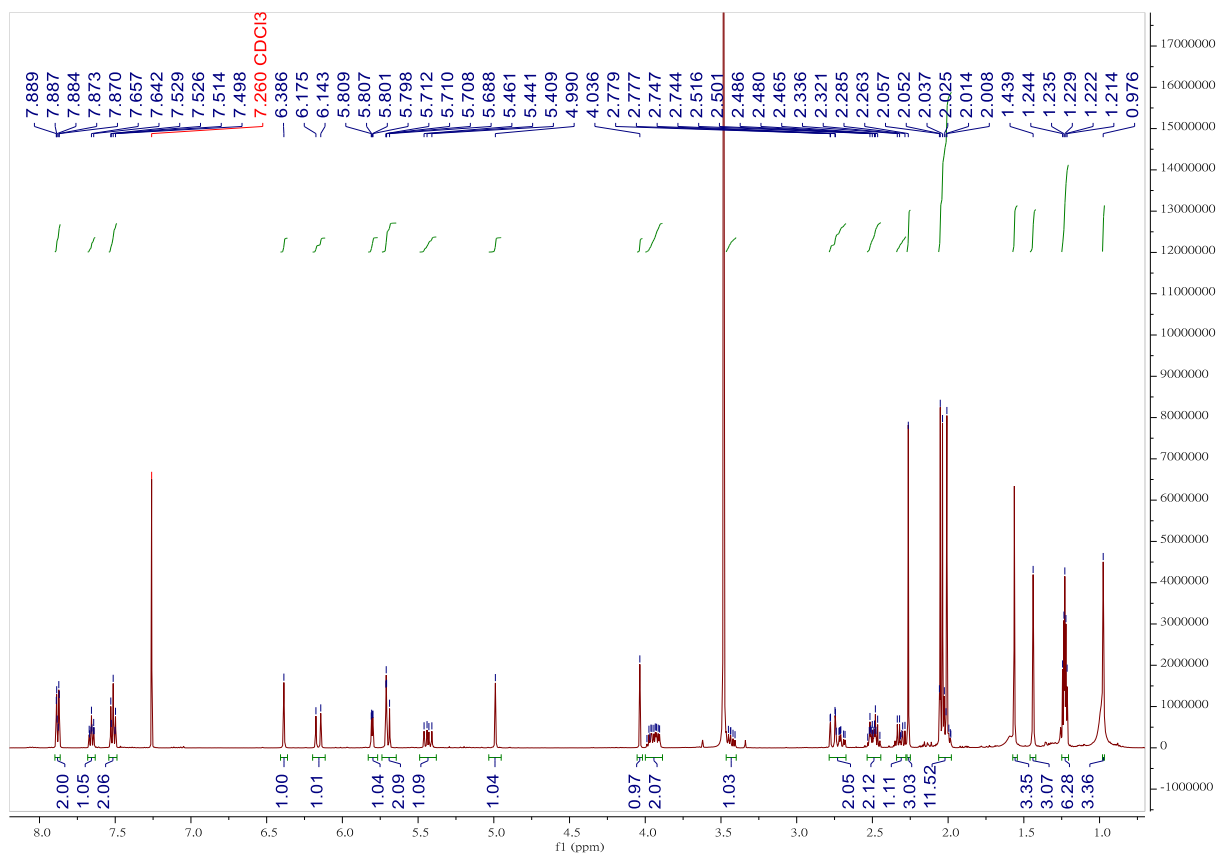

**Figure S29.** The <sup>1</sup>H-NMR spectrum of usambariphane D (5) (500 MHz, CDCl<sub>3</sub>).

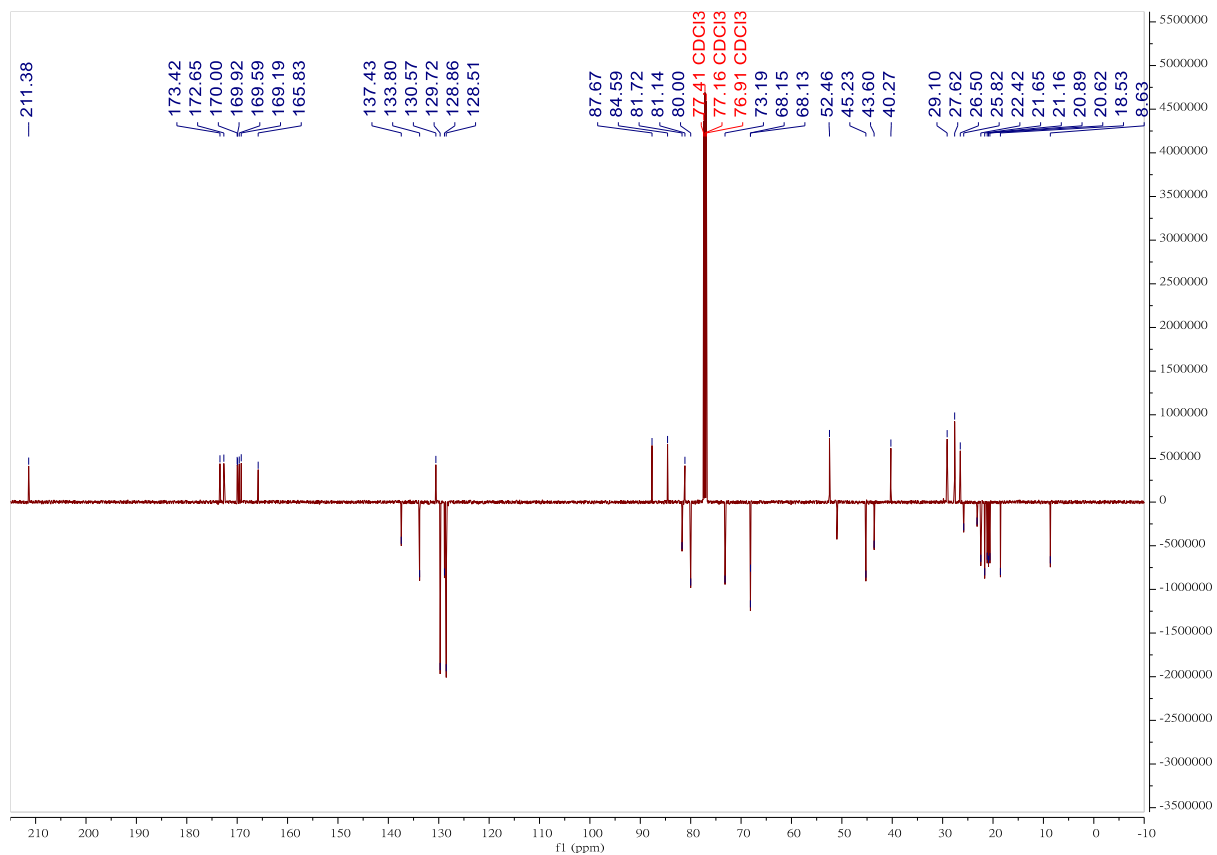

**Figure S30.** The <sup>13</sup>C-JMOD spectrum of usambariphane D (5) (125 MHz, CDCl<sub>3</sub>).

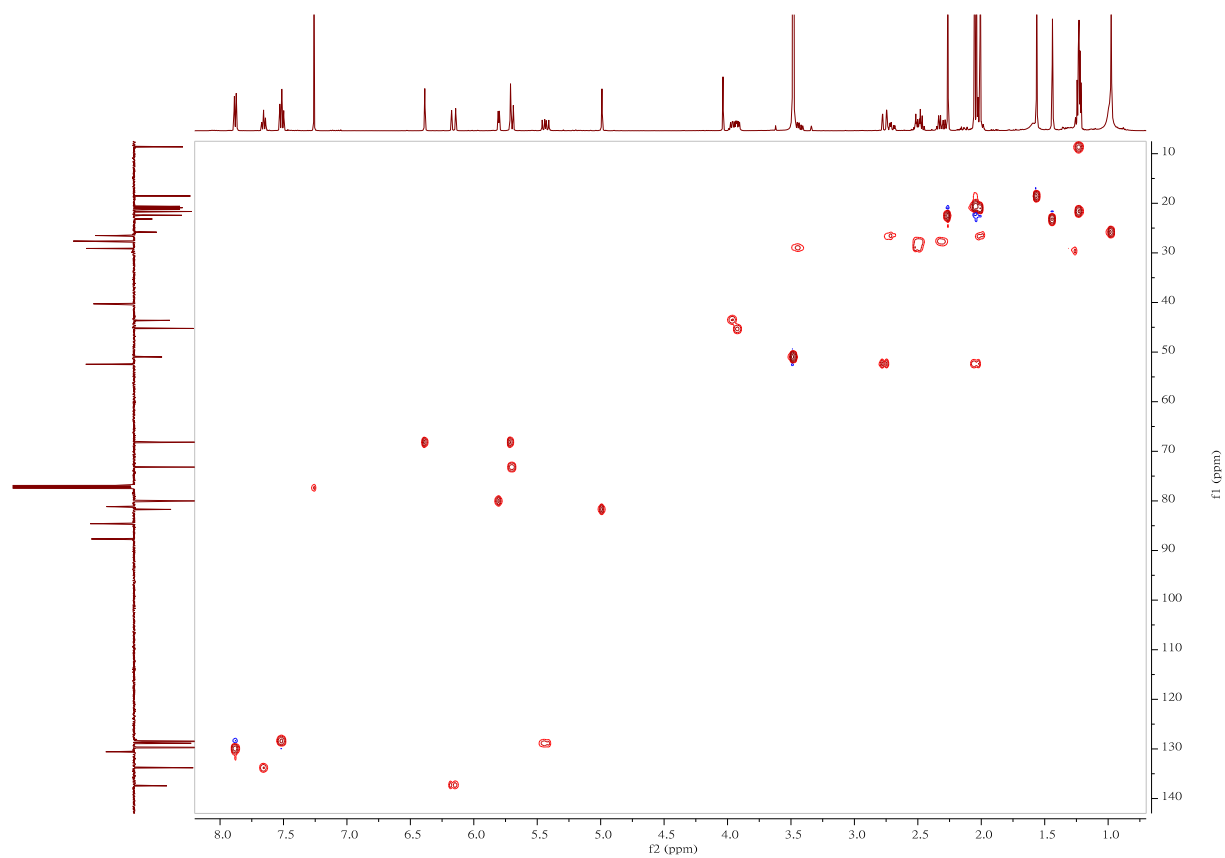

**Figure S31.** The HSQC spectrum of usambariphane D (5).

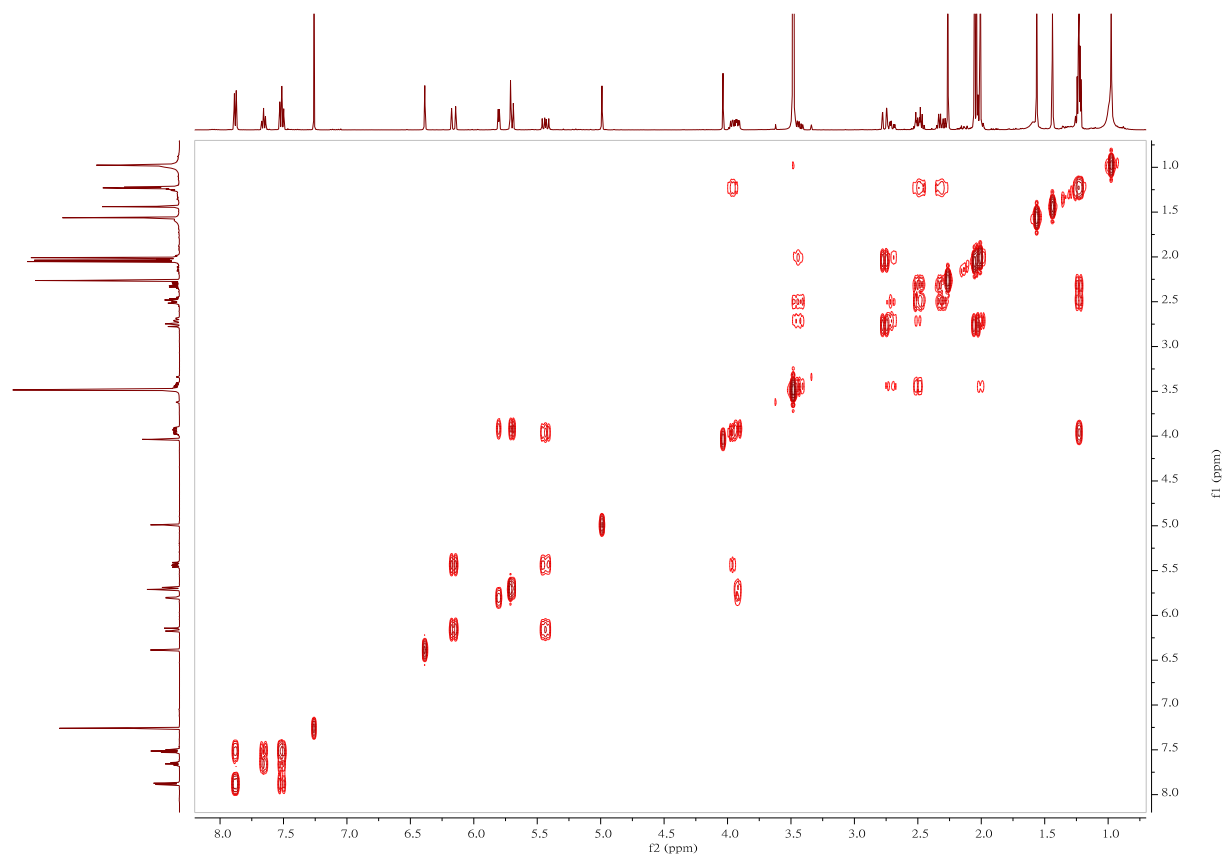

**Figure S32.** The  $^1\text{H}$ - $^1\text{H}$  COSY spectrum of usambariphane D (5).

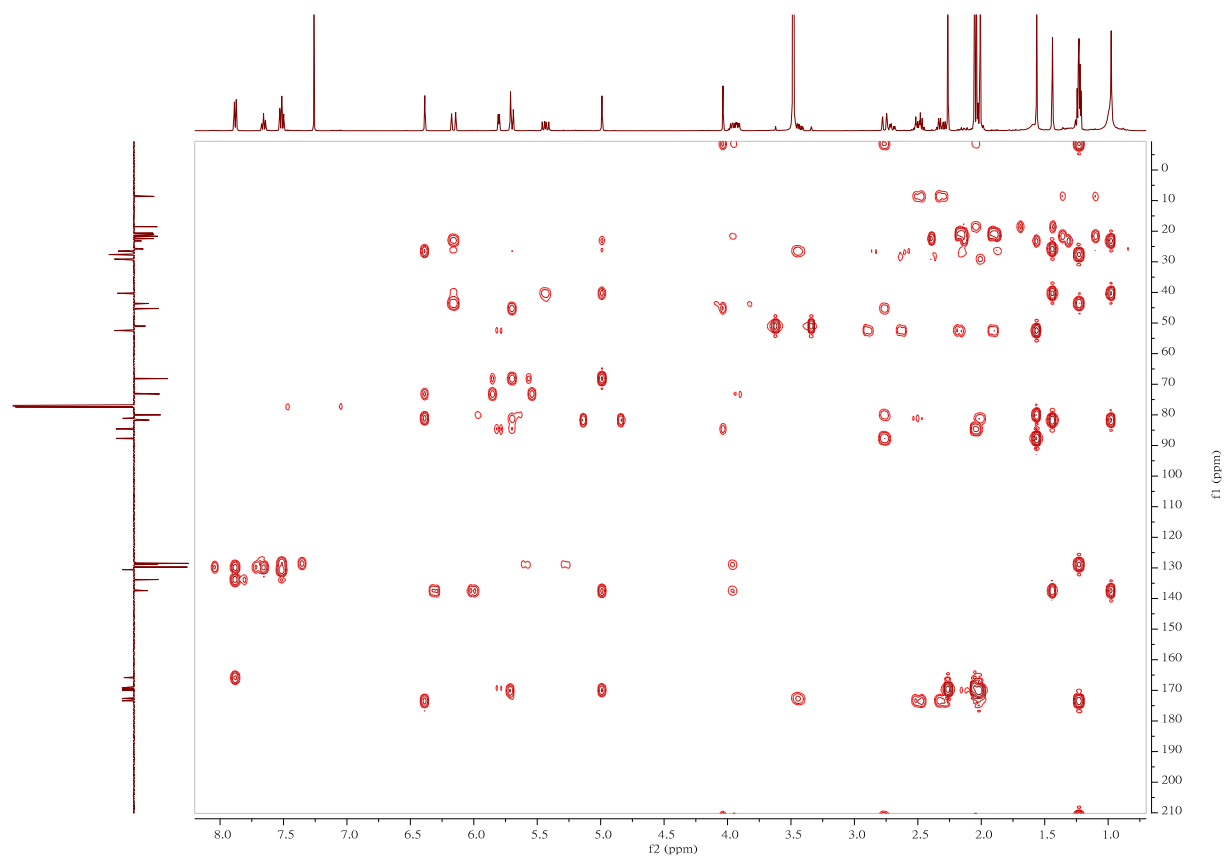

**Figure S33.** The HMBC spectrum of usambariphane D (5).

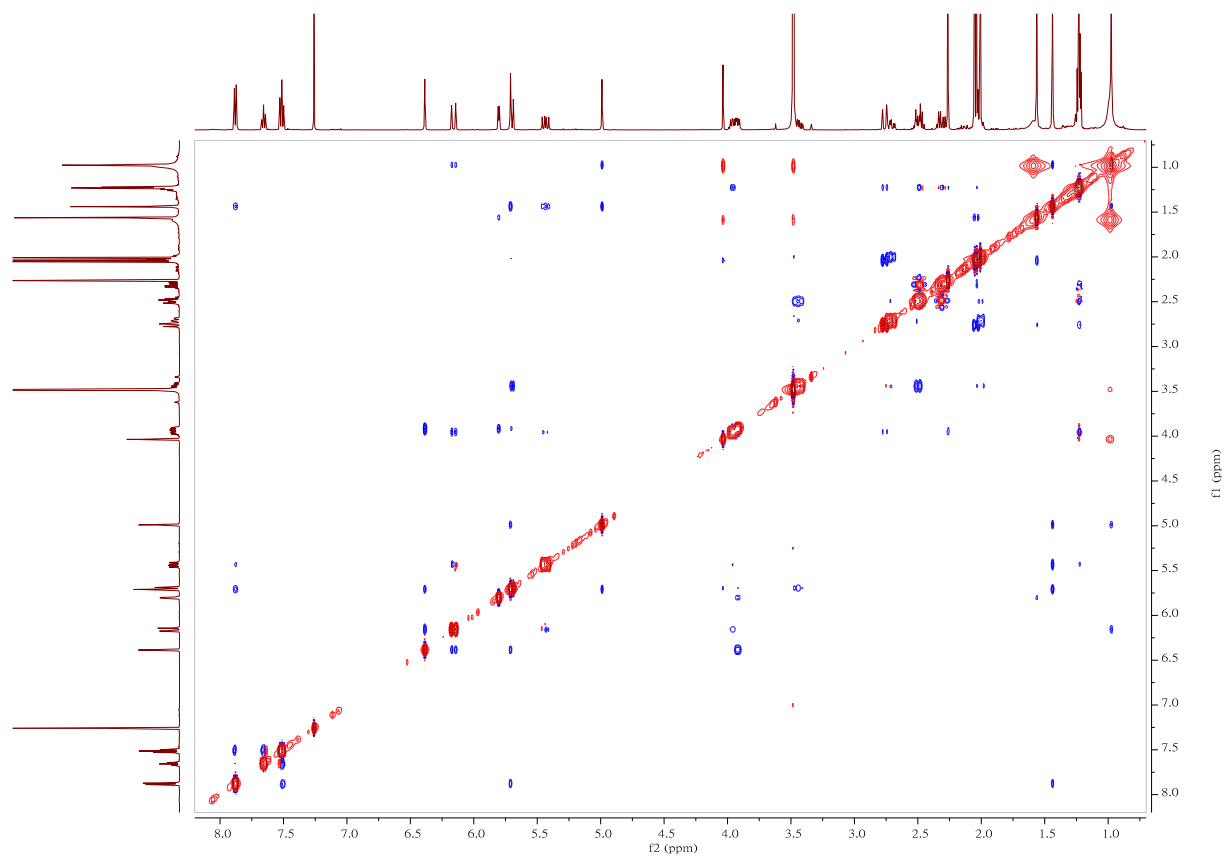

**Figure S34.** The NOESY spectrum of usambariphane D (5).

YC-20200917 #1743-1769 RT: 8.95-9.08 AV: 25 NL: 1.66E8  
T: FTMS + p ESI Full lock ms [100.0000-1000.0000]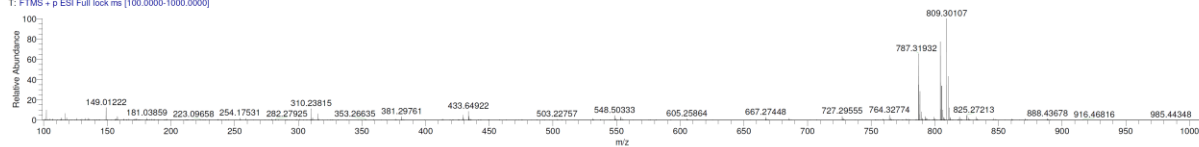YC-20200917 #1743-1769 RT: 8.95-9.08 AV: 25 NL: 1.09E8  
T: FTMS + p ESI Full lock ms [100.0000-1000.0000]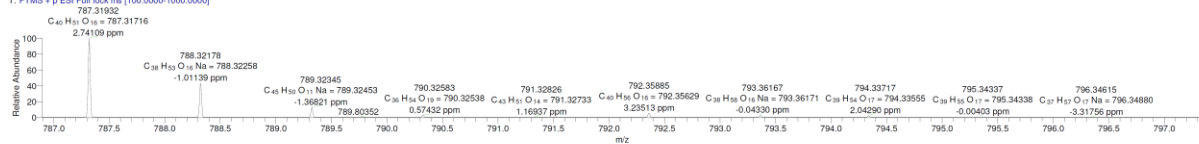YC-20200917 #1743-1769 RT: 8.95-9.08 AV: 25 NL: 1.66E8  
T: FTMS + p ESI Full lock ms [100.0000-1000.0000]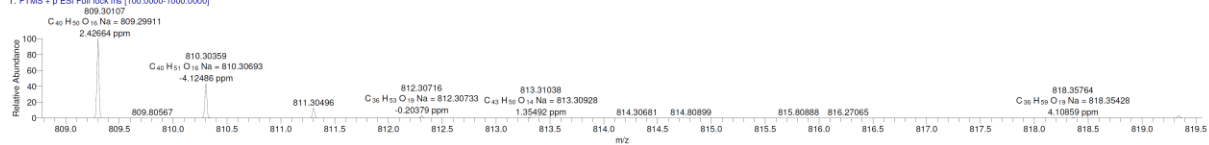

C40H50O16 +H: C40 H51 O16 p16s, s/p:40 Chrg 1R: ...

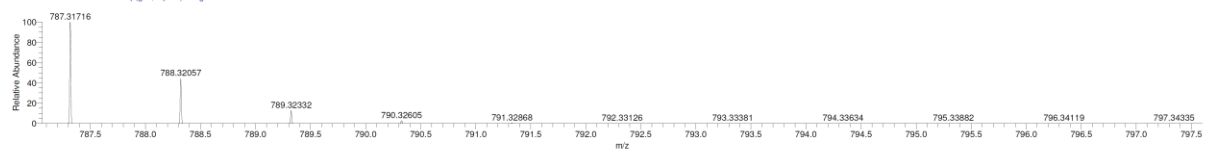

C40H50O16 +Na: C40 H50 O16 Na1 p16s, s/p:40 Chrg 1...

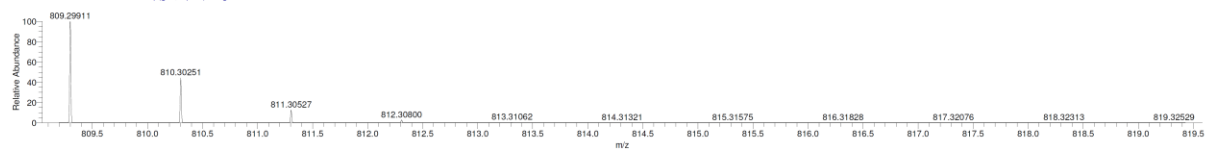

Figure S35. The HR-ESI-MS spectra of usambariphane D (5).

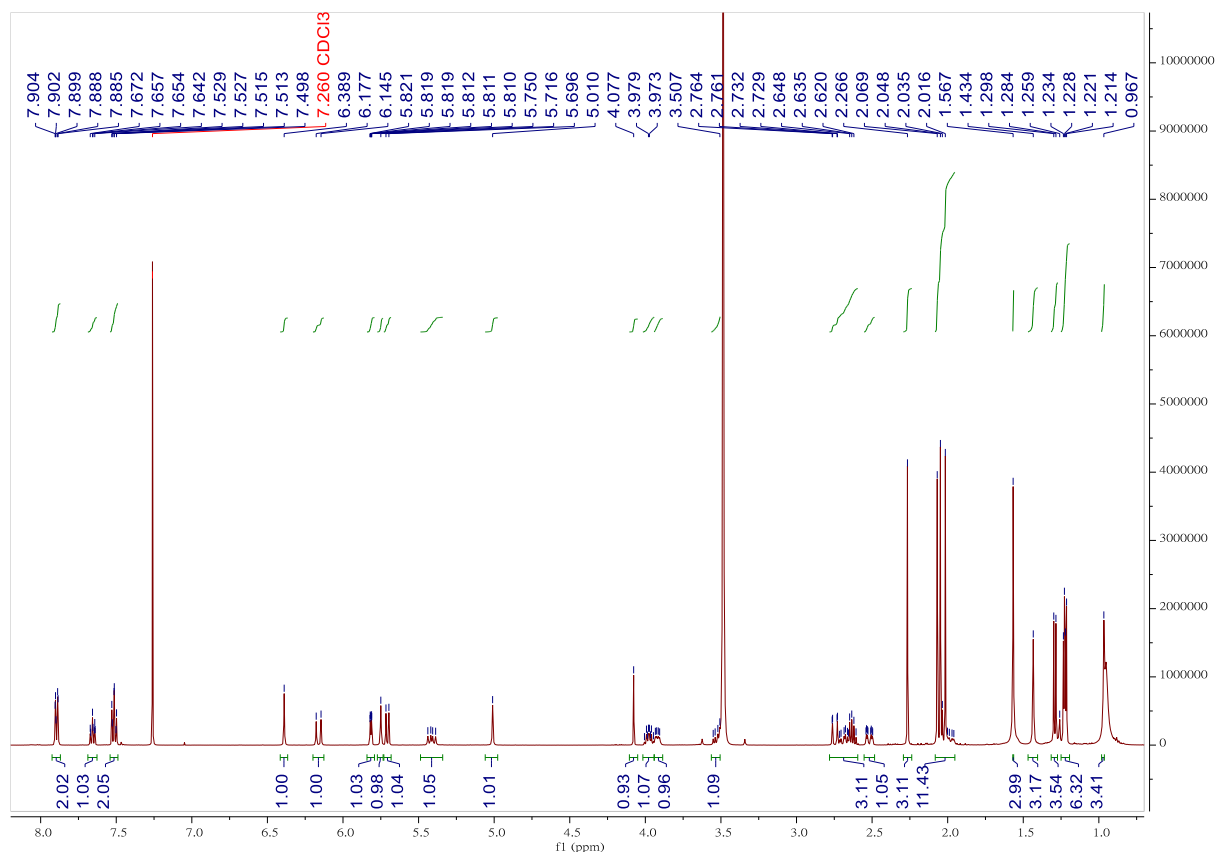

Figure S36. The <sup>1</sup>H-NMR spectrum of usambariphane E (6) (500 MHz, CDCl<sub>3</sub>).

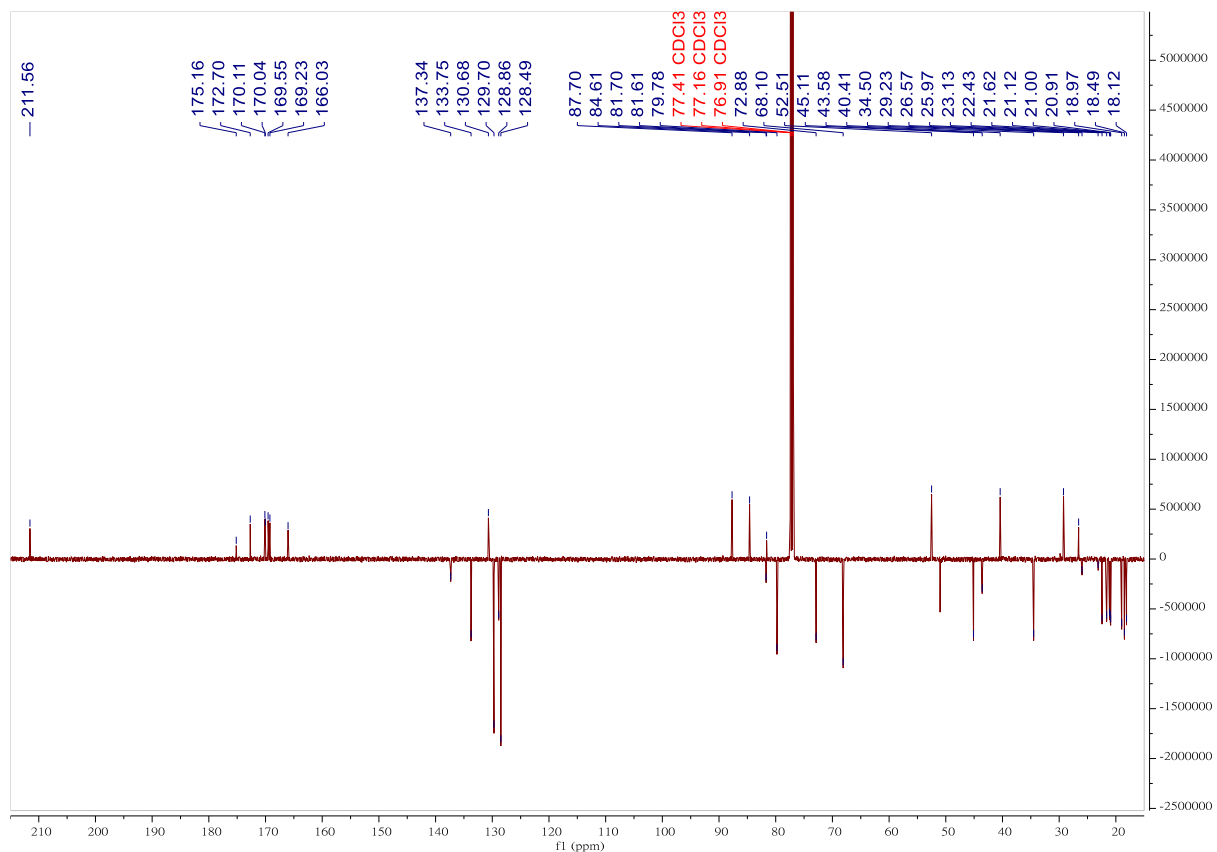

Figure S37. The <sup>13</sup>C-JMOD spectrum of usambariphane E (6) (125 MHz, CDCl<sub>3</sub>).

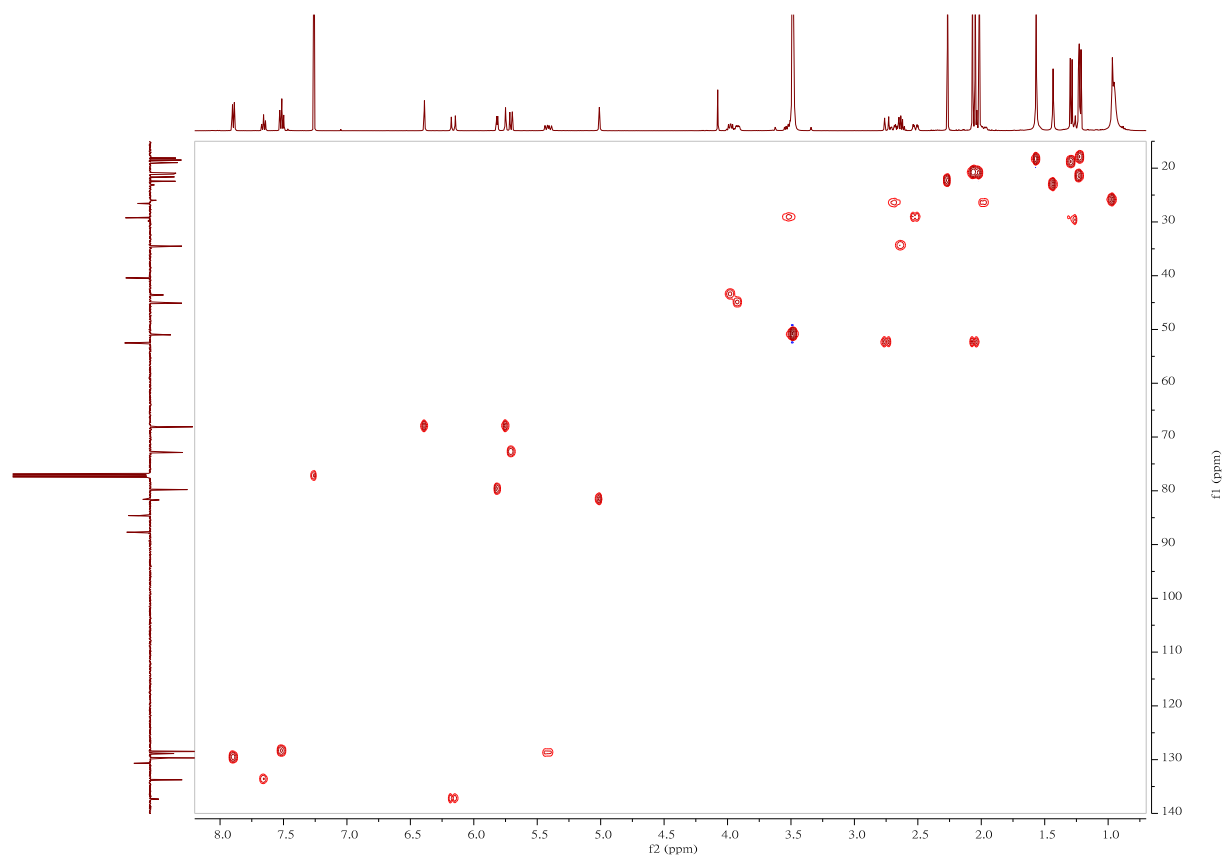

**Figure S38.** The HSQC spectrum of usambariphane E (**6**).

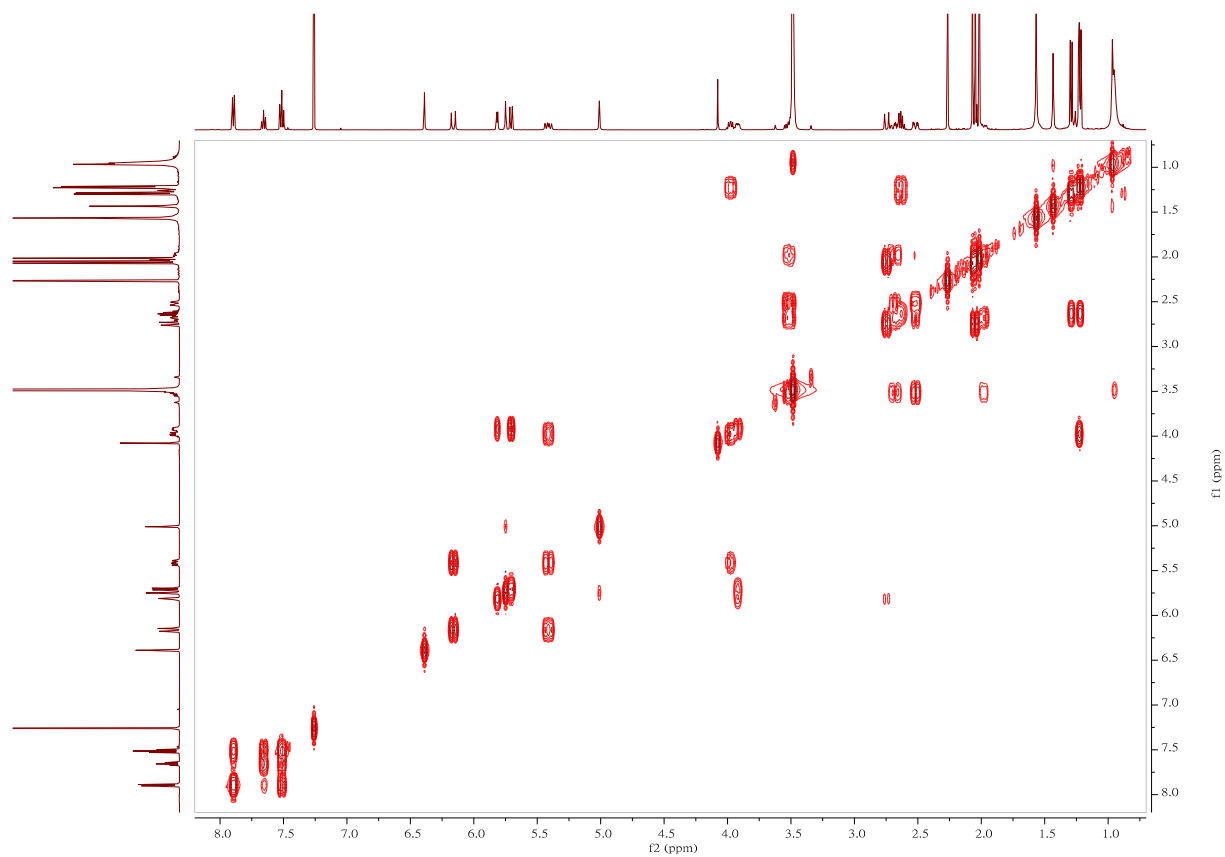

**Figure S39.** The  $^1\text{H}$ - $^1\text{H}$  COSY spectrum of usambariphane E (**6**).



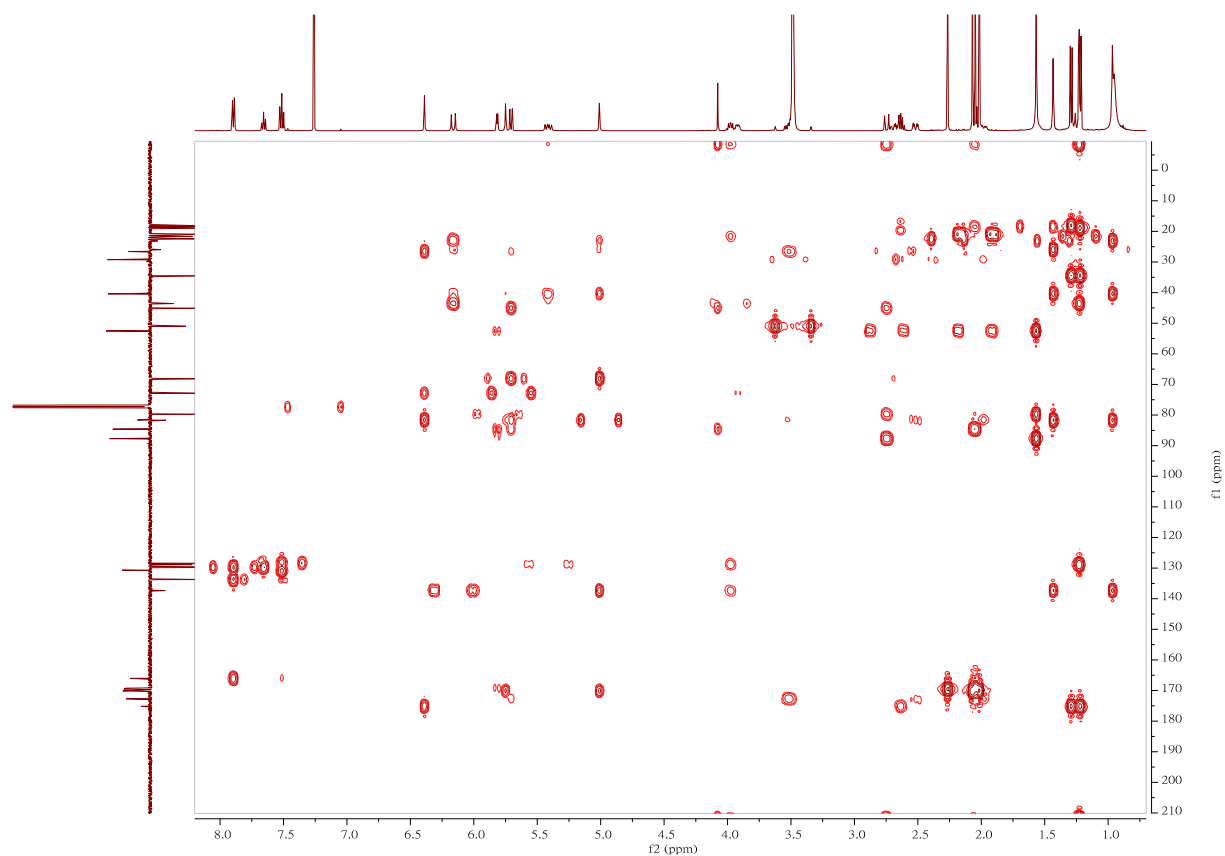

**Figure S40.** The HMBC spectrum of usambariphane E (**6**).

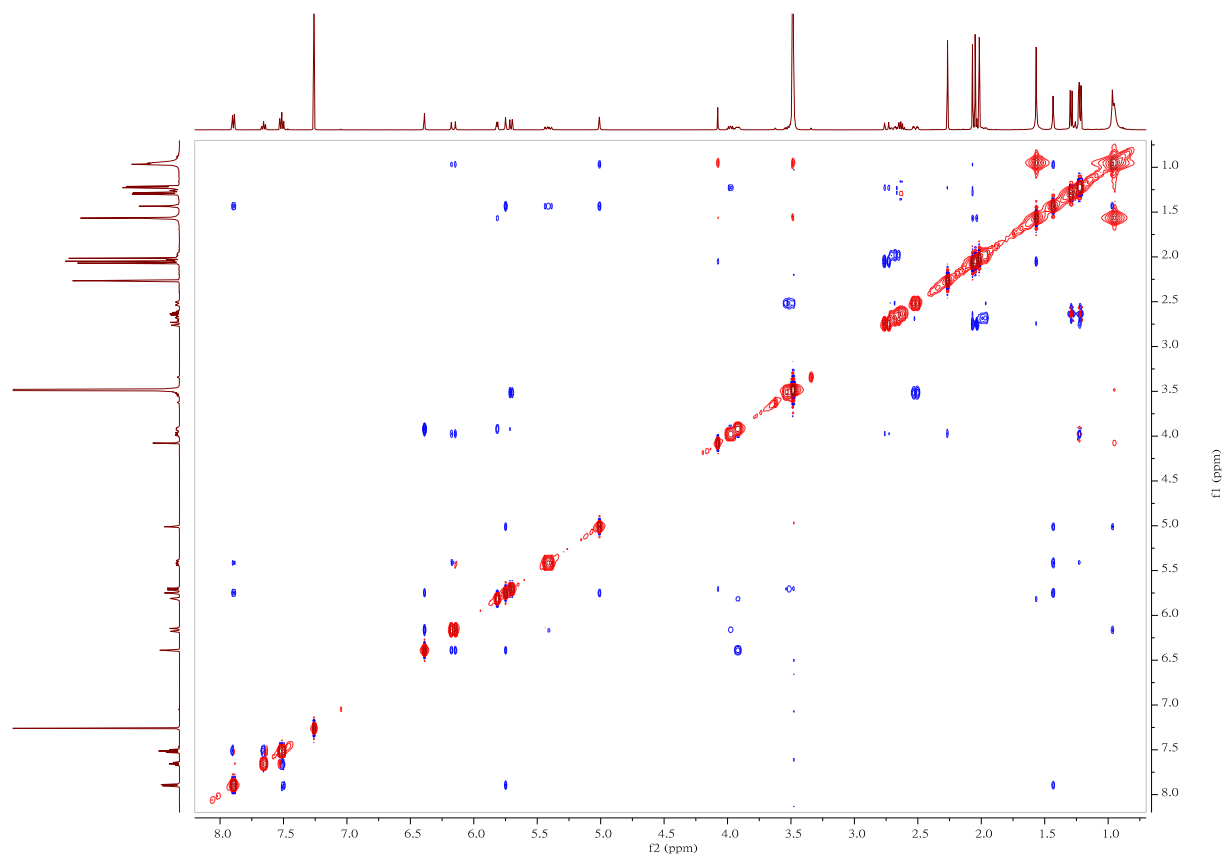

**Figure S41.** The NOESY spectrum of usambariphane E (**6**).

YC-20200917 #1743-1769 RT: 8.95-9.08 AV: 25 NL: 1.66E8  
T: FTMS + p ESI Full lock ms [100.0000-1000.0000]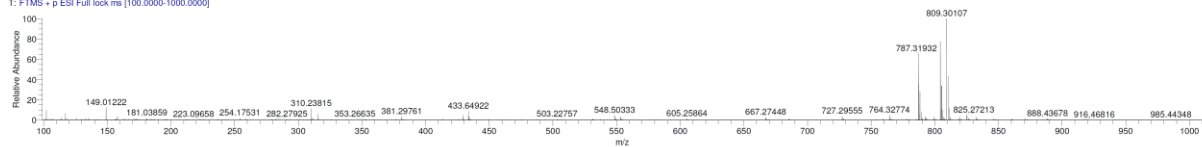YC-20200917 #1743-1769 RT: 8.95-9.08 AV: 25 NL: 1.09E8  
T: FTMS + p ESI Full lock ms [100.0000-1000.0000]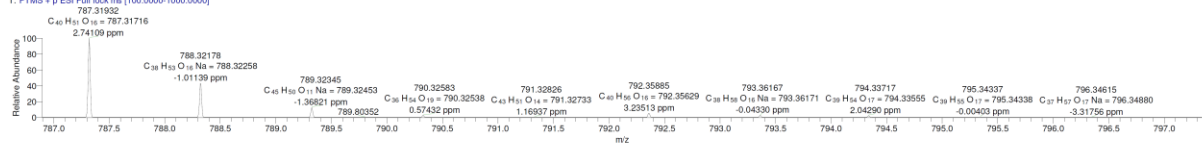YC-20200917 #1743-1769 RT: 8.95-9.08 AV: 25 NL: 1.66E8  
T: FTMS + p ESI Full lock ms [100.0000-1000.0000]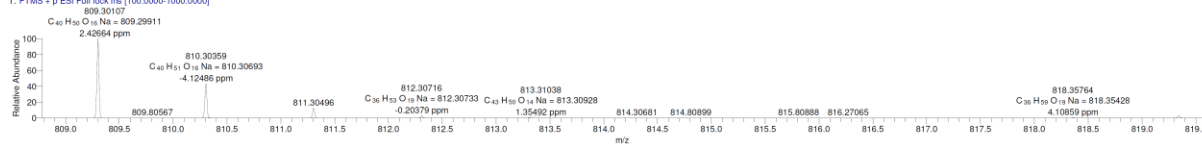

C40H50O16 +H: C40 H51 O16 p1gss, s/p:40 Chrg 1R: ...

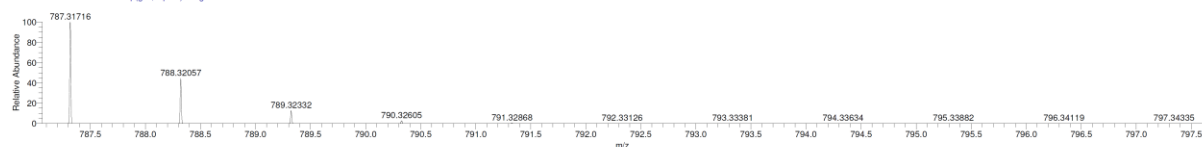

C40H50O16 +Na: C40 H50 O16 Na1 p1gss, s/p:40 Chrg 1R: ...

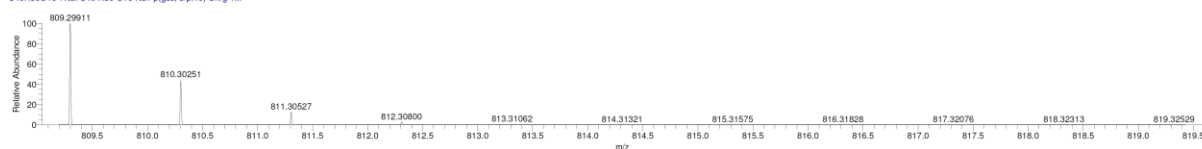

Figure S42. The HR-ESI-MS spectra of usambariphane E (6).

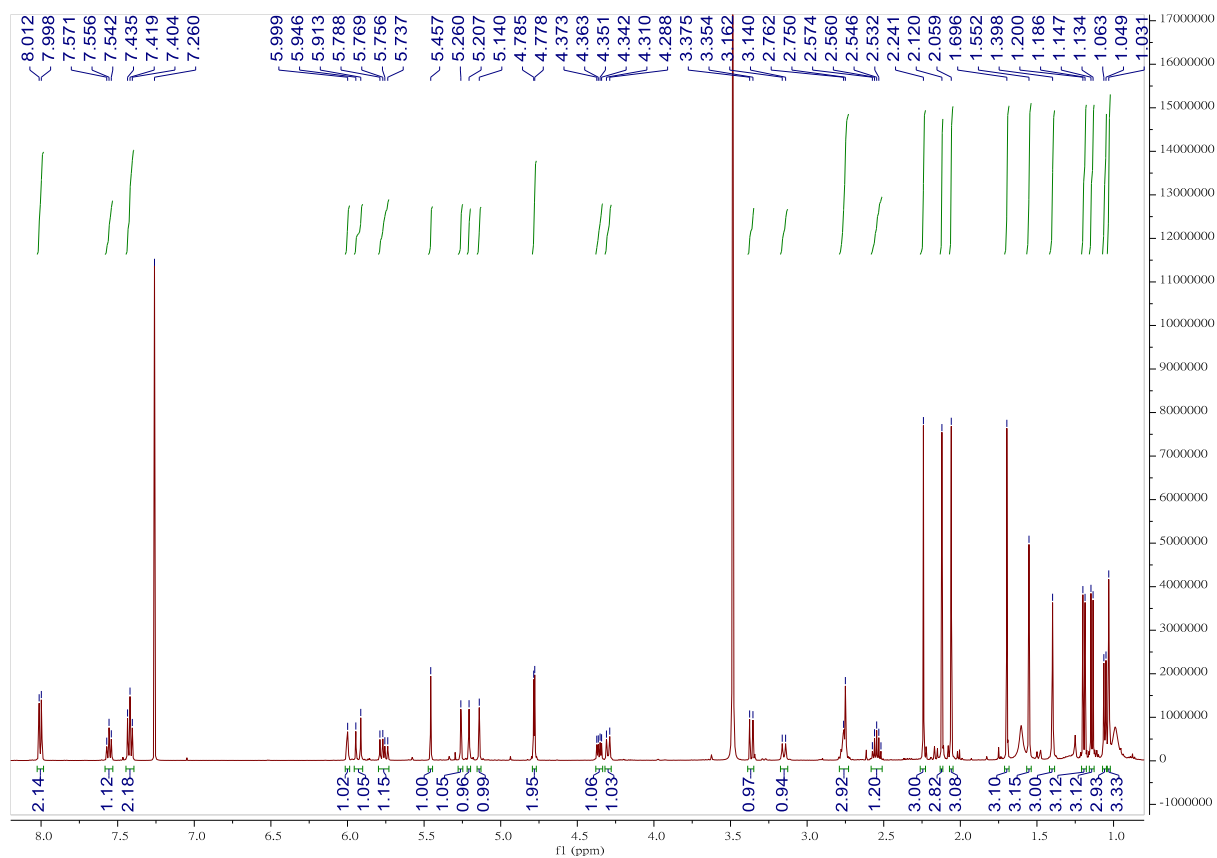

**Figure S43.** The <sup>1</sup>H-NMR spectrum of usambariphane F (7) (500 MHz, CDCl<sub>3</sub>).

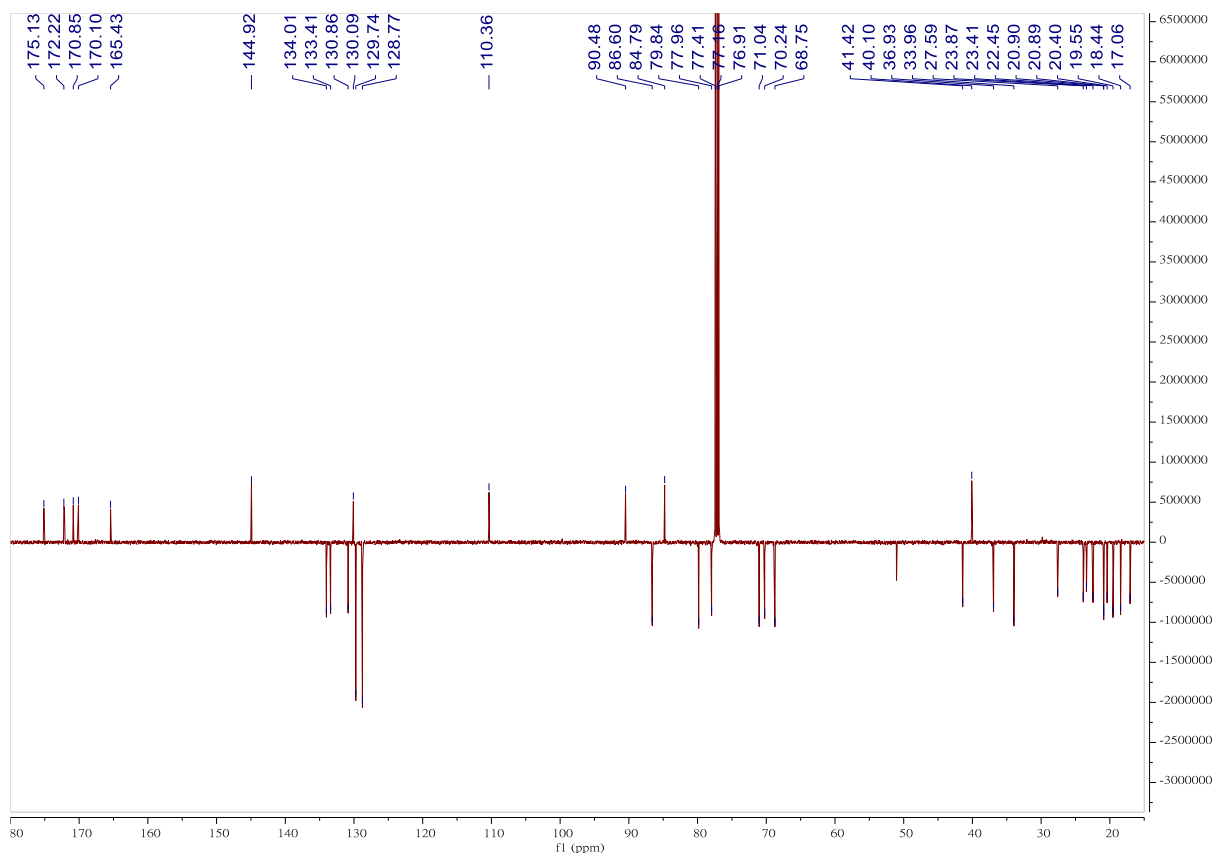

**Figure S44.** The <sup>13</sup>C-JMOD spectrum of usambariphane F (7) (125 MHz, CDCl<sub>3</sub>).

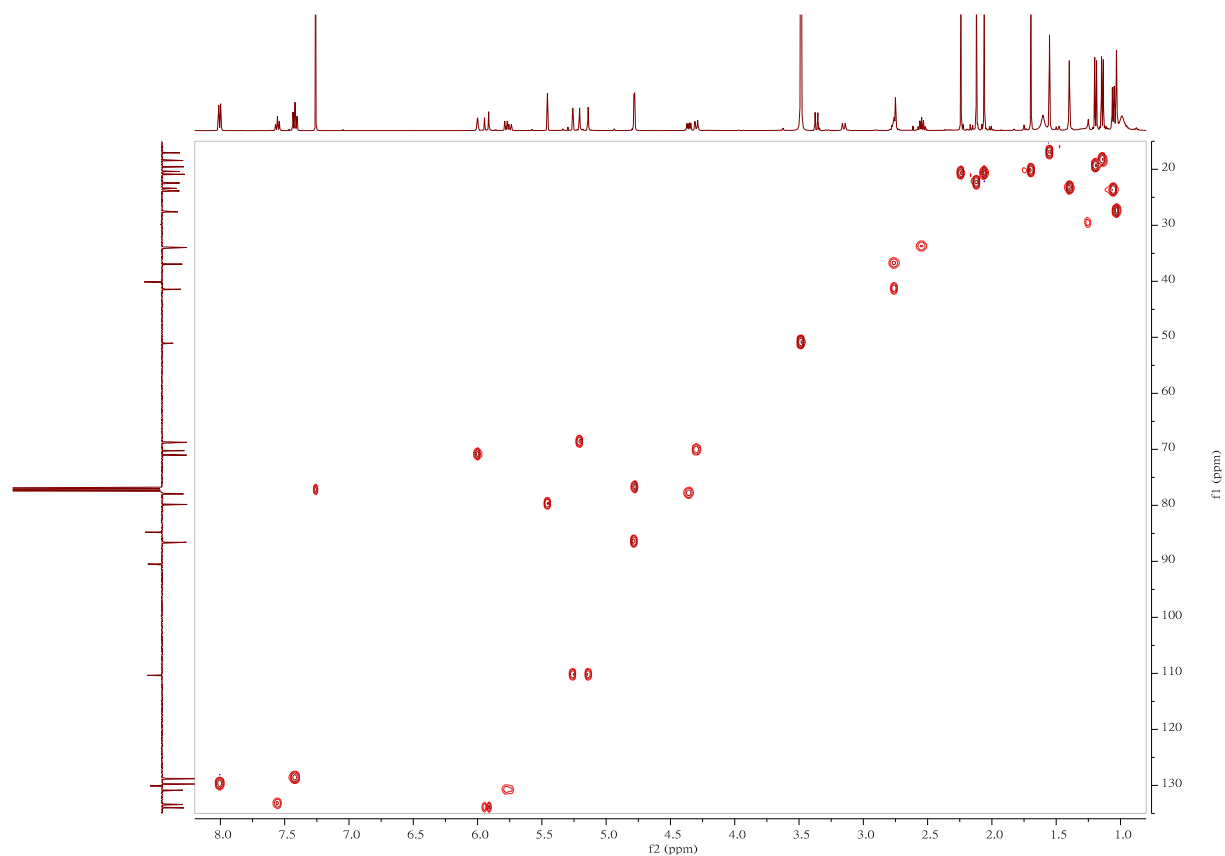

**Figure S45.** The HSQC spectrum of usambariphane F (7).

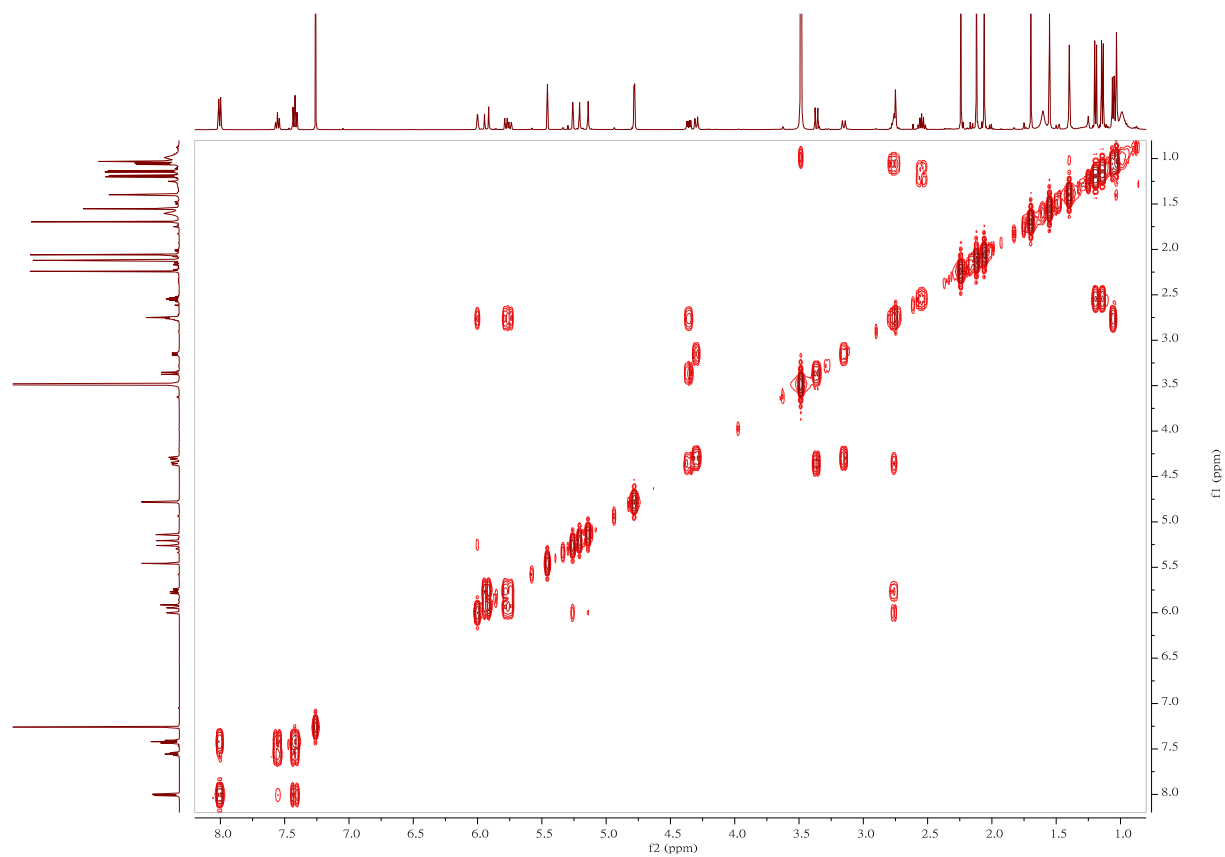

**Figure S46.** The  $^1\text{H}$ - $^1\text{H}$  COSY spectrum of usambariphane F (7).

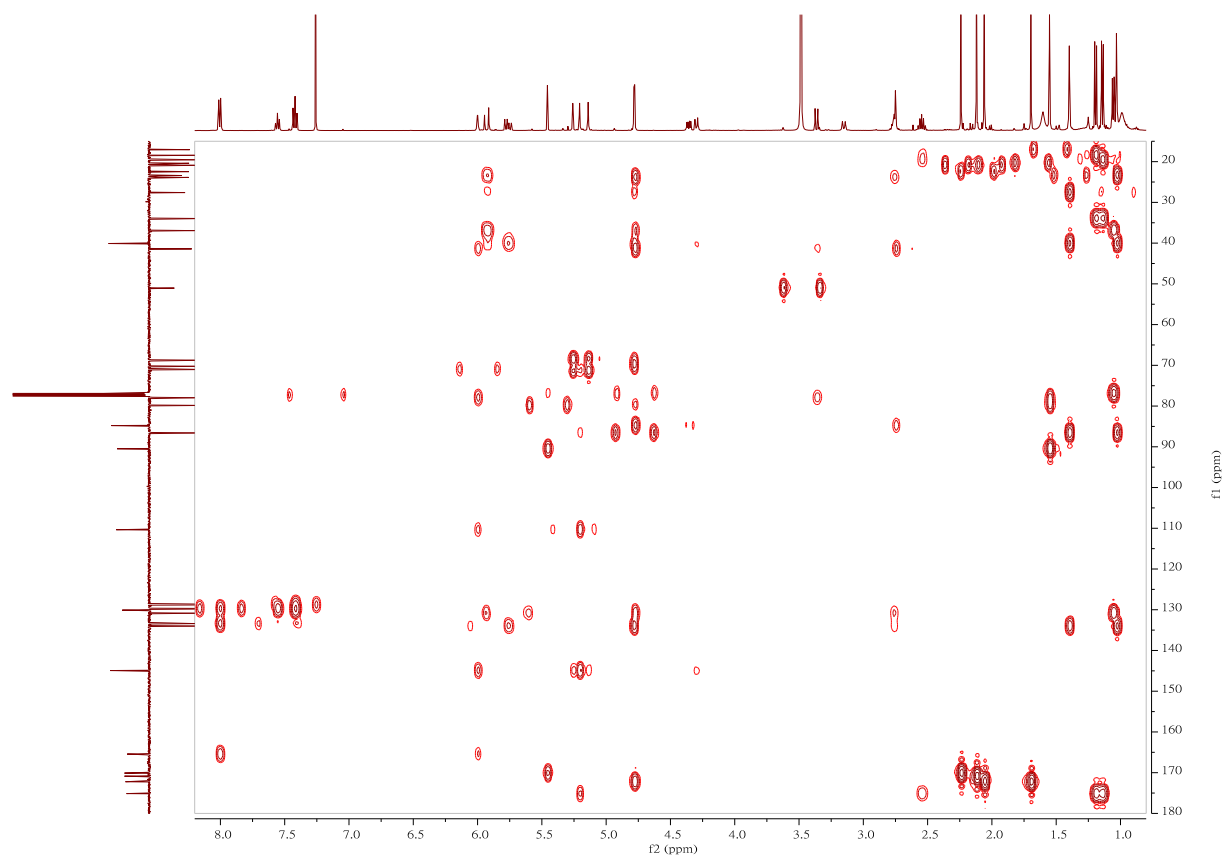

**Figure S47.** The HMBC spectrum of usambariphane F (7).

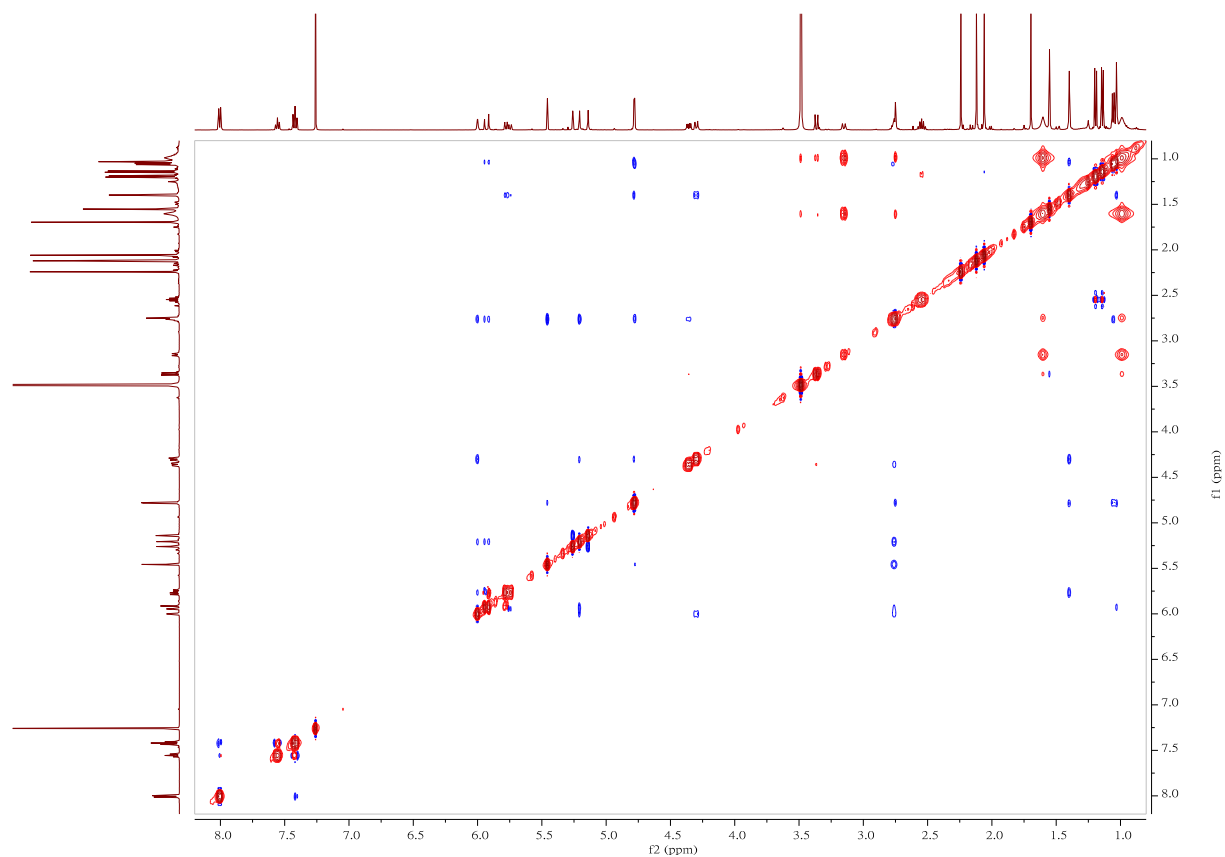

**Figure S48.** The NOESY spectrum of usambariphane F (7).

YC-20200917 #1230-1263 RT: 6.31-6.48 AV: 34 NL: 9.05E7  
T: FTMS + p ESI Full lock ms [100.0000-1000.0000]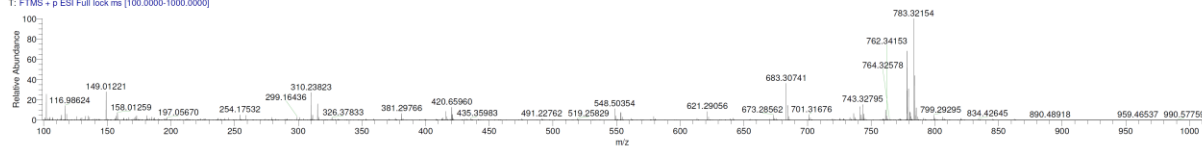YC-20200917 #1230-1263 RT: 6.31-6.48 AV: 34 NL: 9.19E6  
T: FTMS + p ESI Full lock ms [100.0000-1000.0000]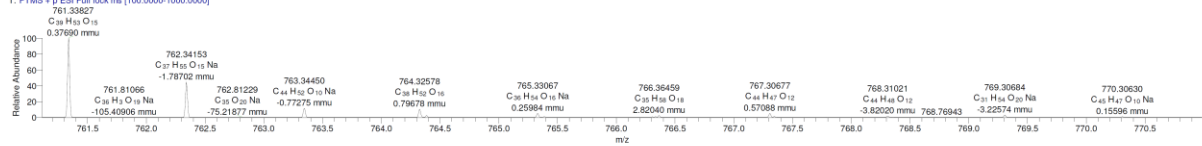YC-20200917 #1230-1263 RT: 6.31-6.48 AV: 34 NL: 9.05E7  
T: FTMS + p ESI Full lock ms [100.0000-1000.0000]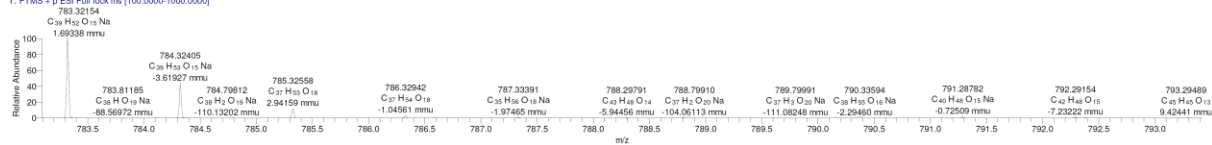

C39H52O15 +H: C39 H53 O15 p1gms, s/p:40 Chrg 1R: ...

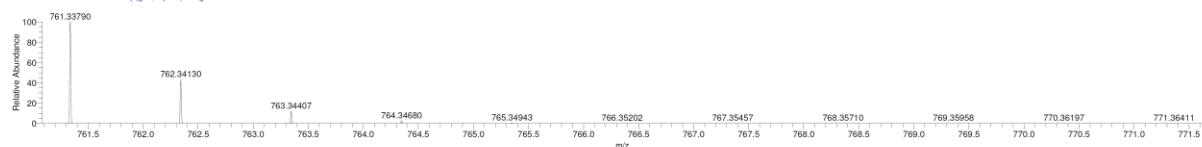

C39H52O15 +Na: C39 H52 O15 Na1 p1gms, s/p:40 Chrg 1: ...

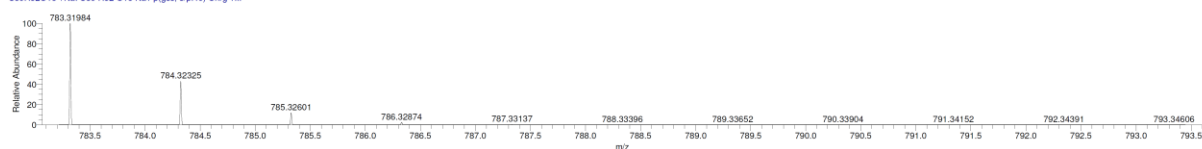

Figure S49. The HR-ESI-MS spectra of usambariphane F (7).

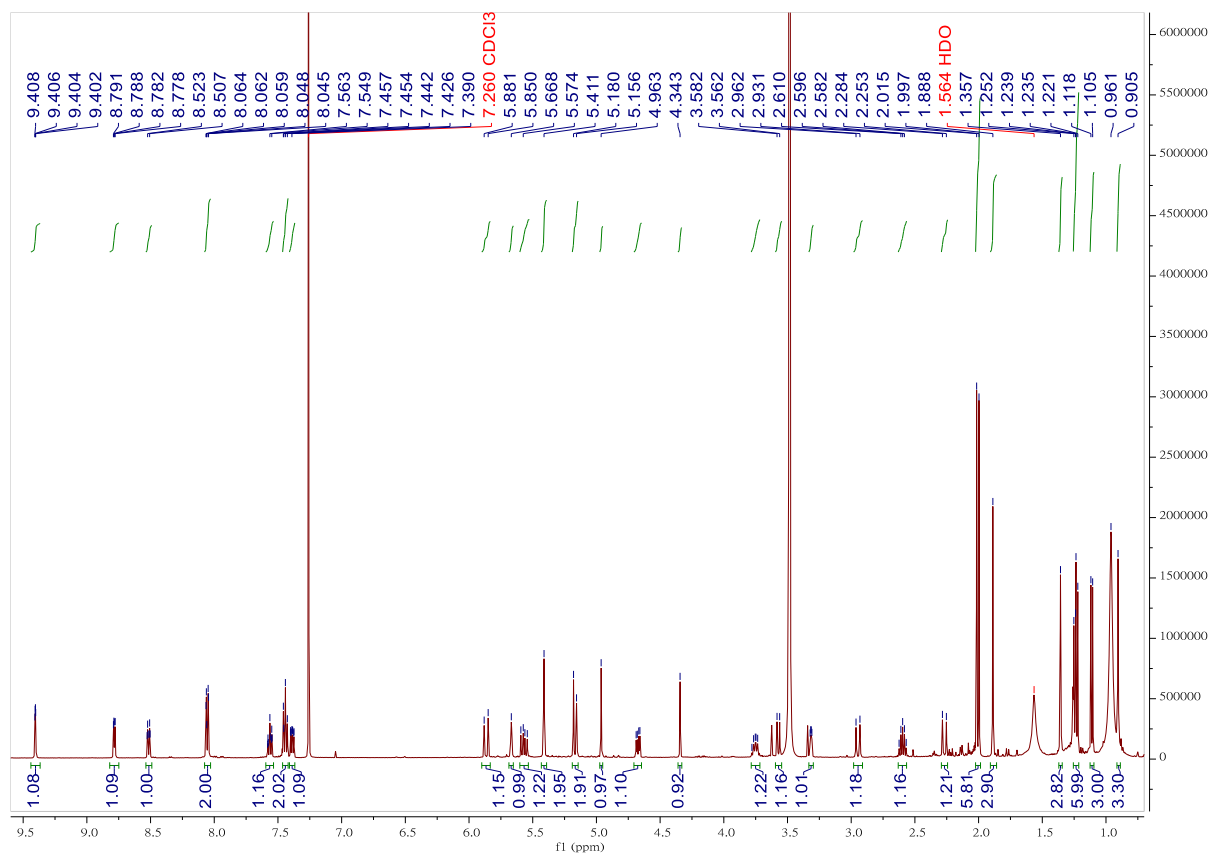

**Figure S50.** The <sup>1</sup>H-NMR spectrum of usambariphane G (8) (500 MHz, CDCl<sub>3</sub>).

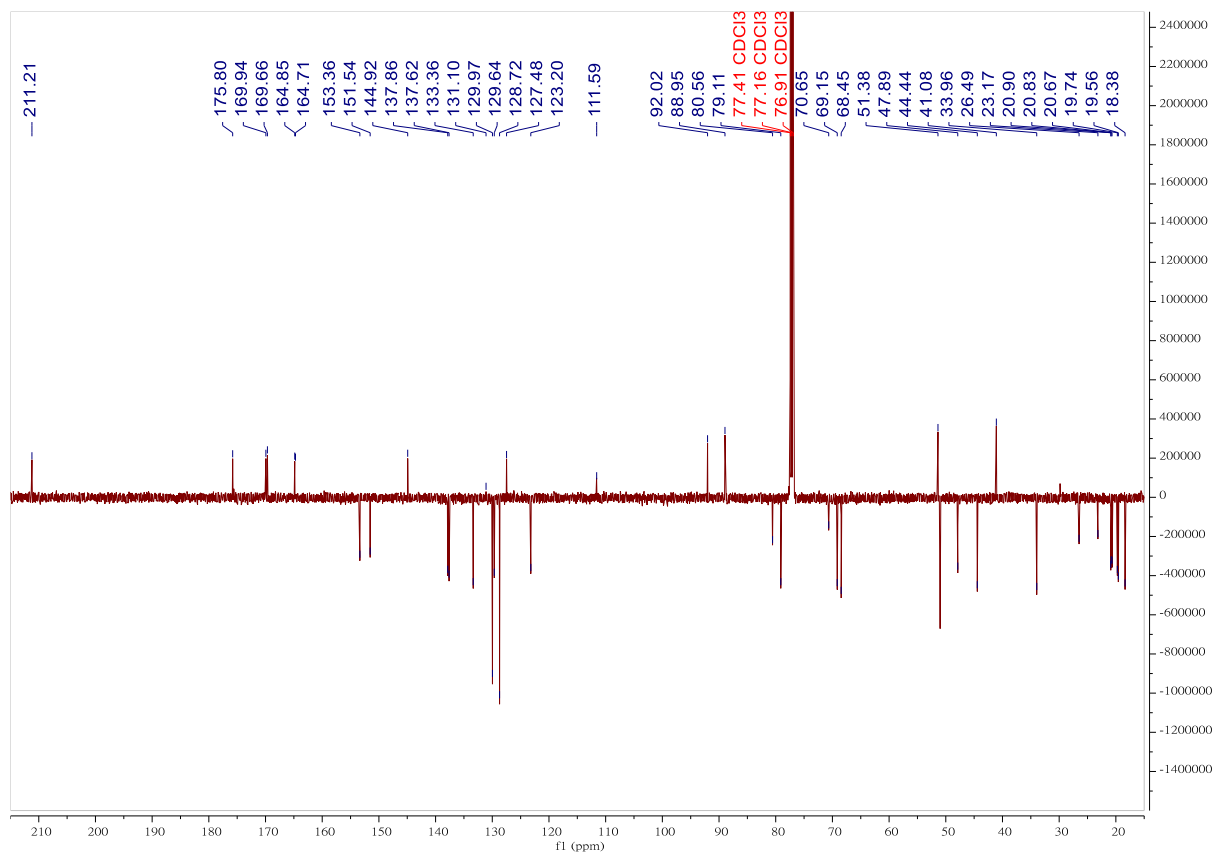

**Figure S51.** The <sup>13</sup>C-JMOD spectrum of usambariphane G (8) (125 MHz, CDCl<sub>3</sub>).

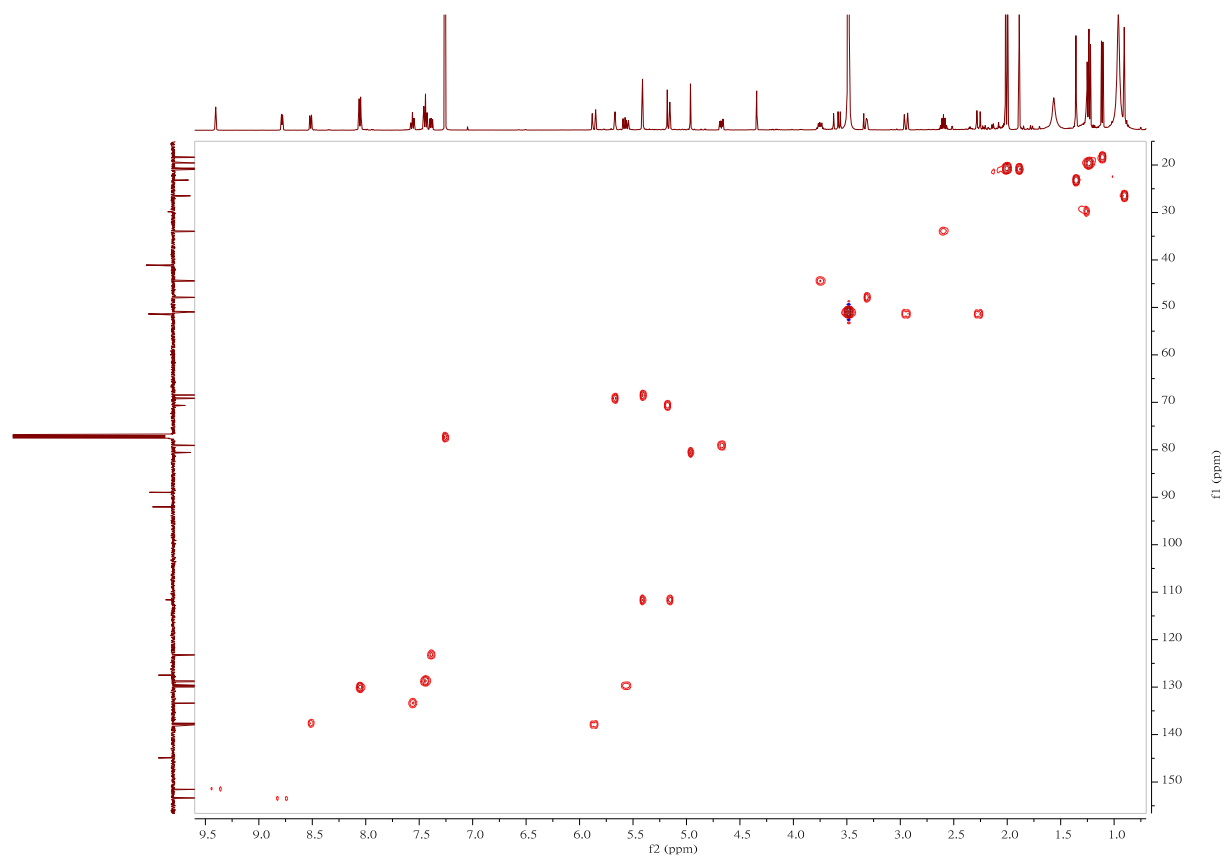

**Figure S52.** The HSQC spectrum of usambariphane G (8).

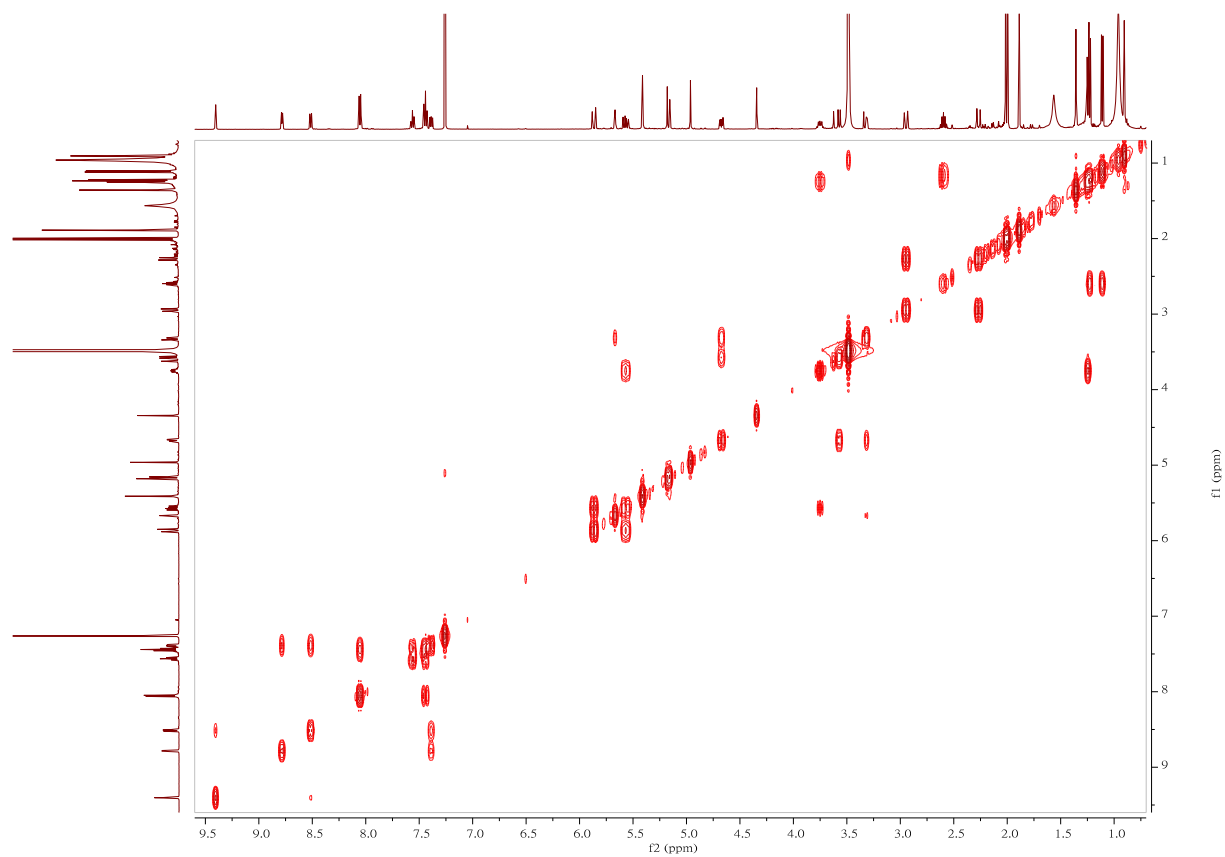

**Figure S53.** The  $^1\text{H}$ - $^1\text{H}$  COSY spectrum of usambariphane G (8).



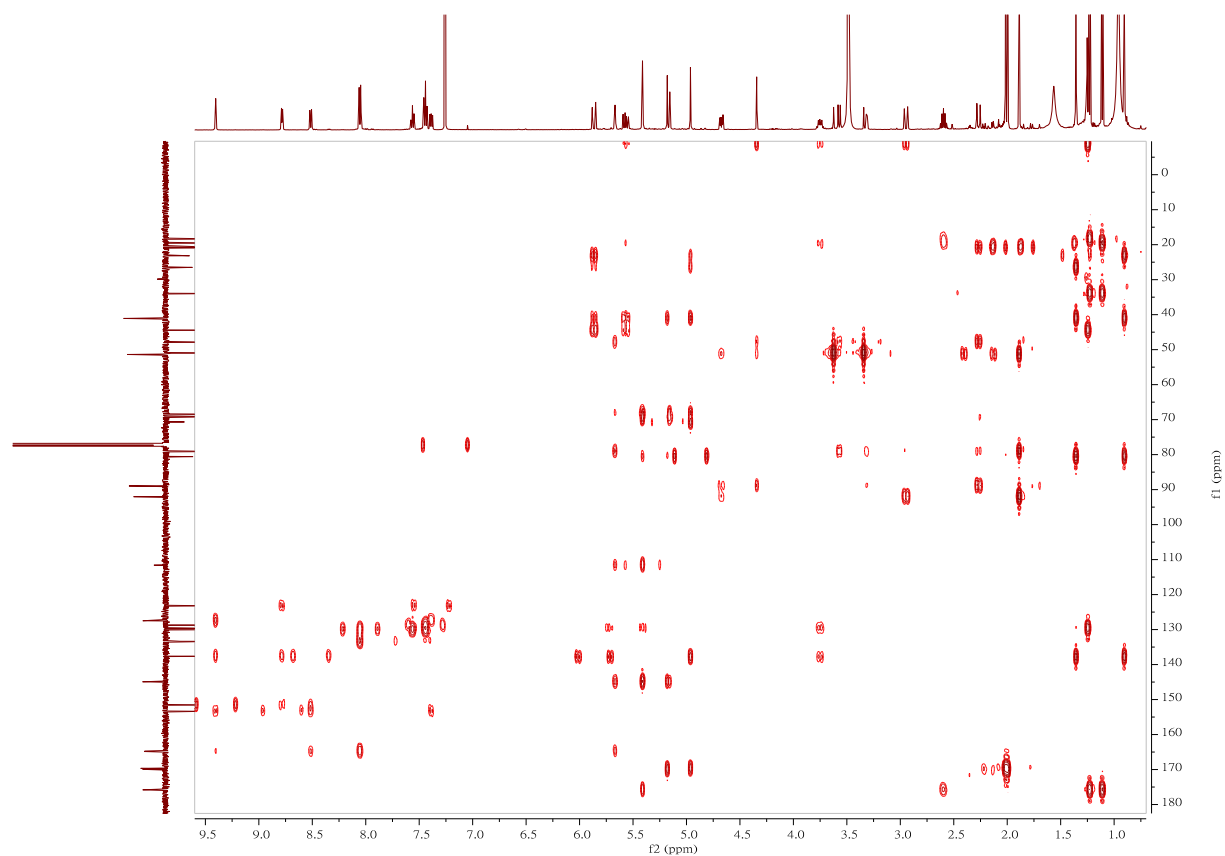

**Figure S54.** The HMBC spectrum of usambariphane G (8).

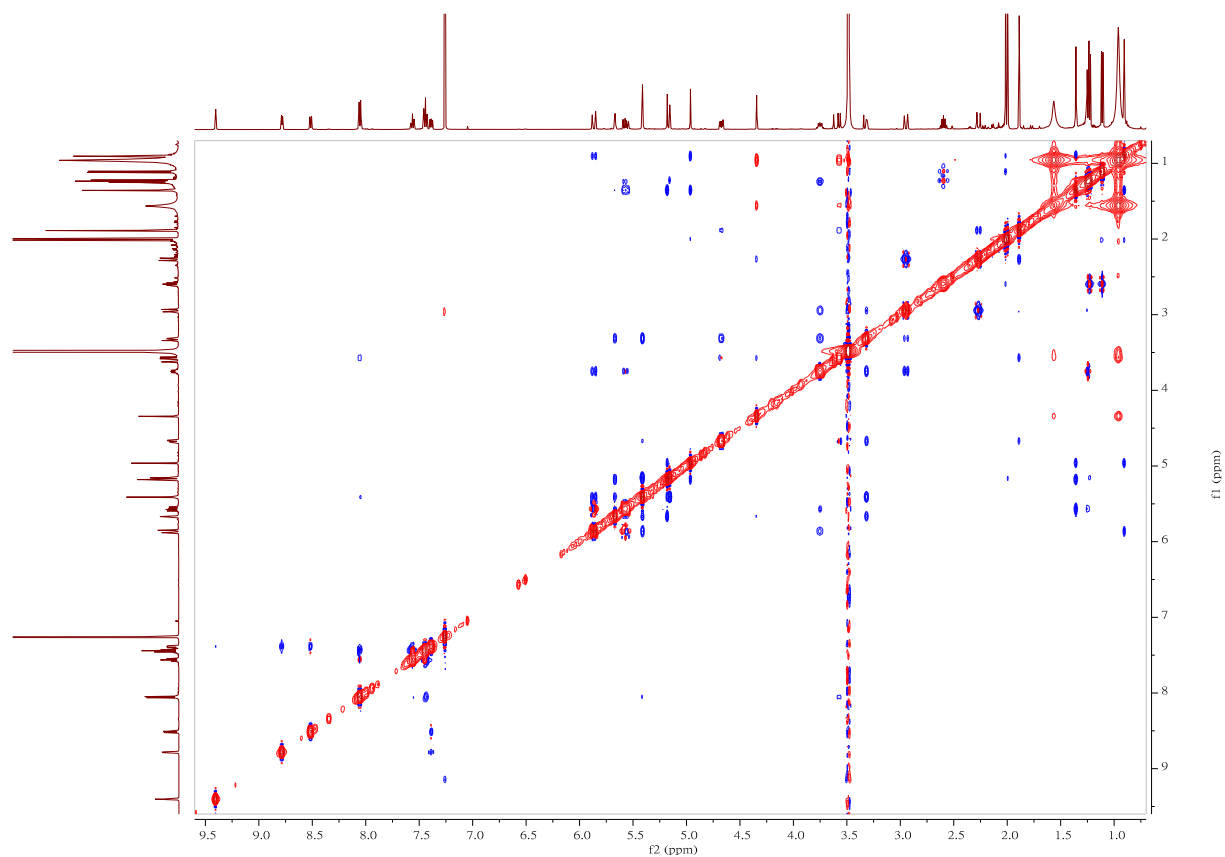

**Figure S55.** The NOESY spectrum of usambariphane G (8).

YC-20200917 #2034-2078 RT: 10.45-10.67 AV: 45 NL: 4.73E8  
T: FTMS + p ESI Full lock ms [100.0000-1000.0000]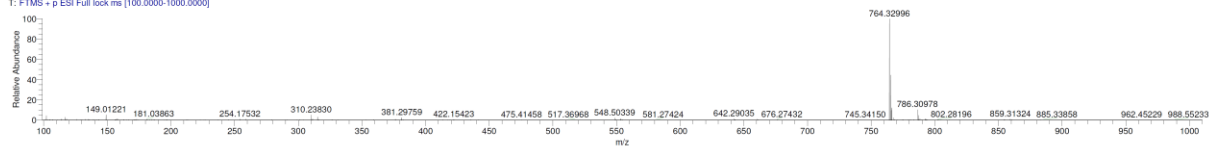YC-20200917 #2034-2078 RT: 10.45-10.67 AV: 45 NL: 4.73E8  
T: FTMS + p ESI Full lock ms [100.0000-1000.0000]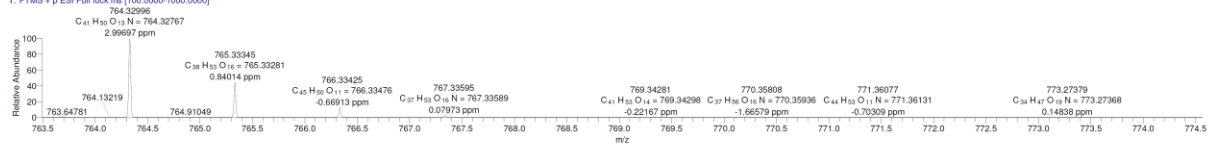YC-20200917 #2034-2078 RT: 10.45-10.67 AV: 45 NL: 4.85E7  
T: FTMS + p ESI Full lock ms [100.0000-1000.0000]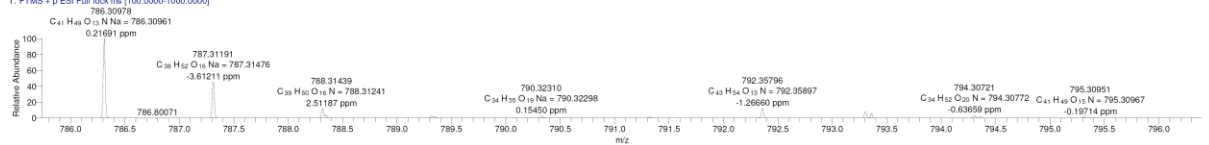

C41H49NO13 +H: C41 H50 N1 O13 p(gas, s/p:40) Chrg 1...

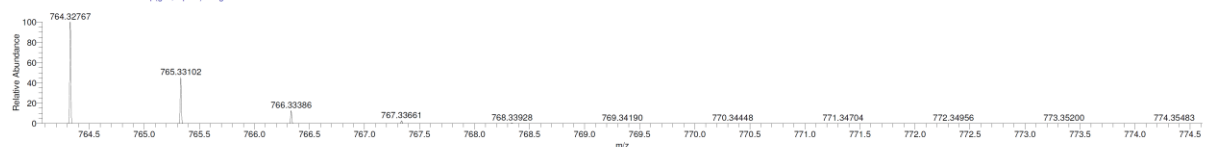

C41H49NO13 +Na: C41 H49 N1 O13 Na1 p(gas, s/p:40) Ch...

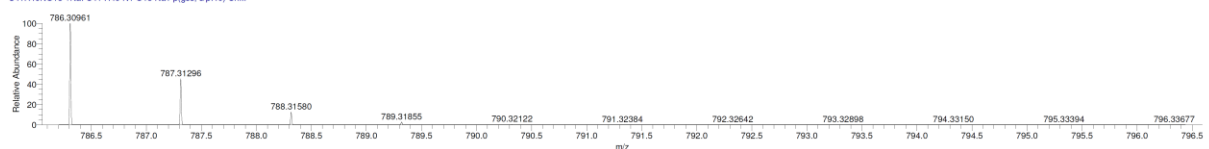

Figure S56. The HR-ESI-MS spectra of usambariphane G (8).

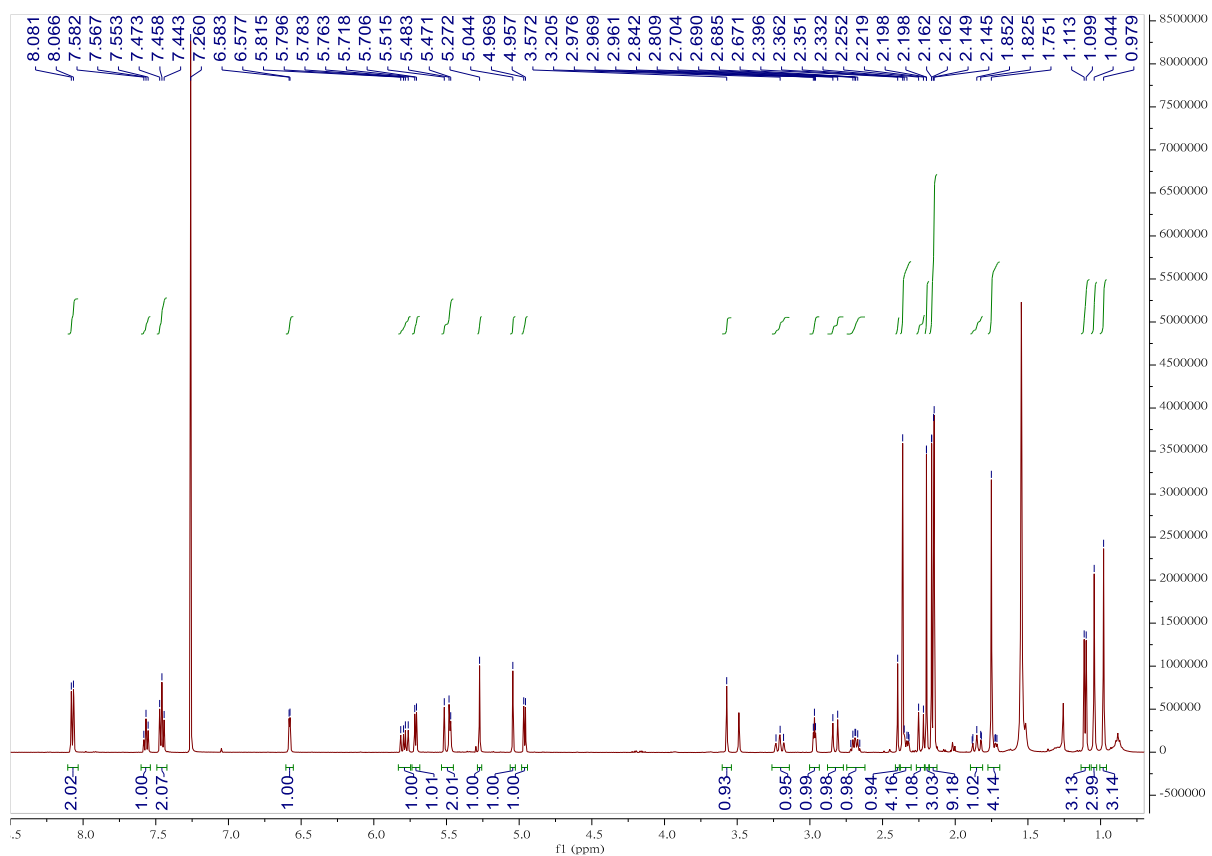

**Figure S57.** The  $^1\text{H}$ -NMR spectrum of isoterracinolide C (**9**) (500 MHz,  $\text{CDCl}_3$ ).

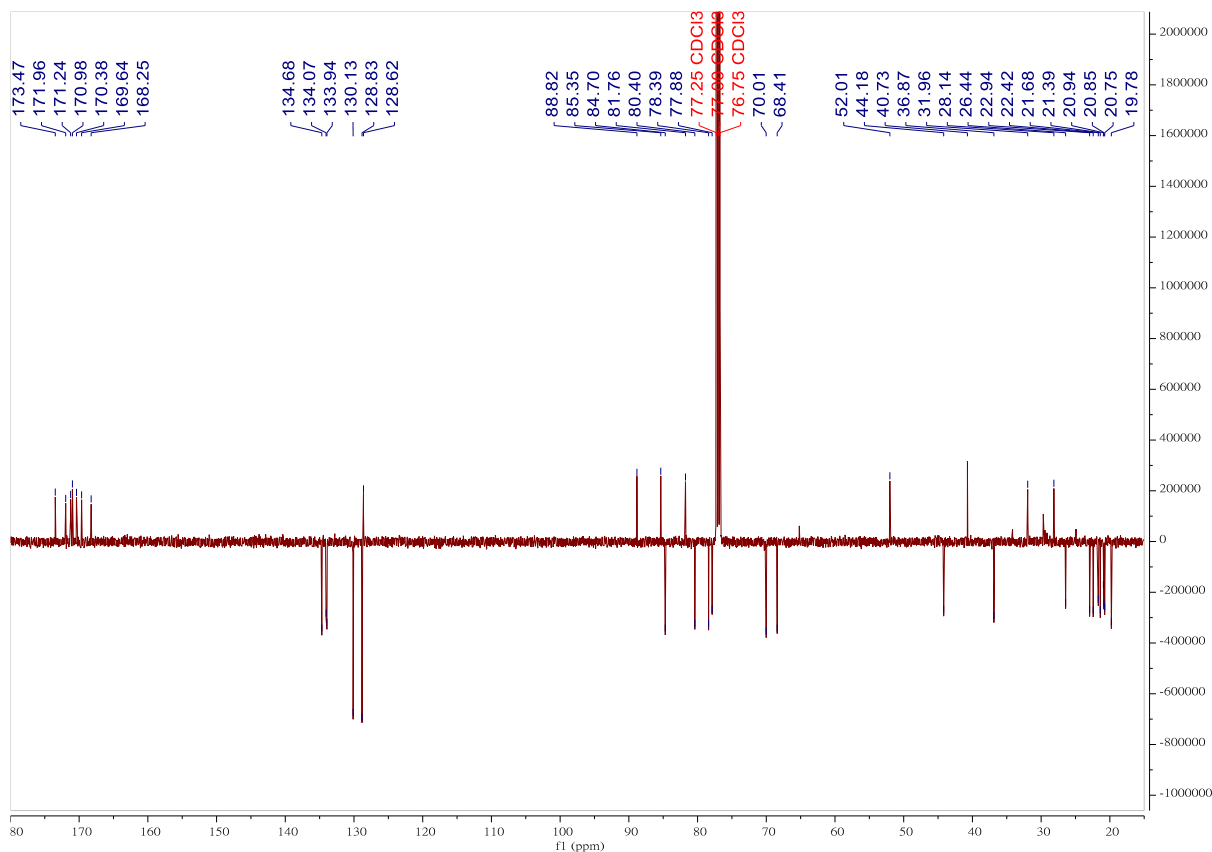

**Figure S58.** The  $^{13}\text{C}$ -JMOD spectrum of isoterracinolide C (**9**) (500 MHz,  $\text{CDCl}_3$ ).

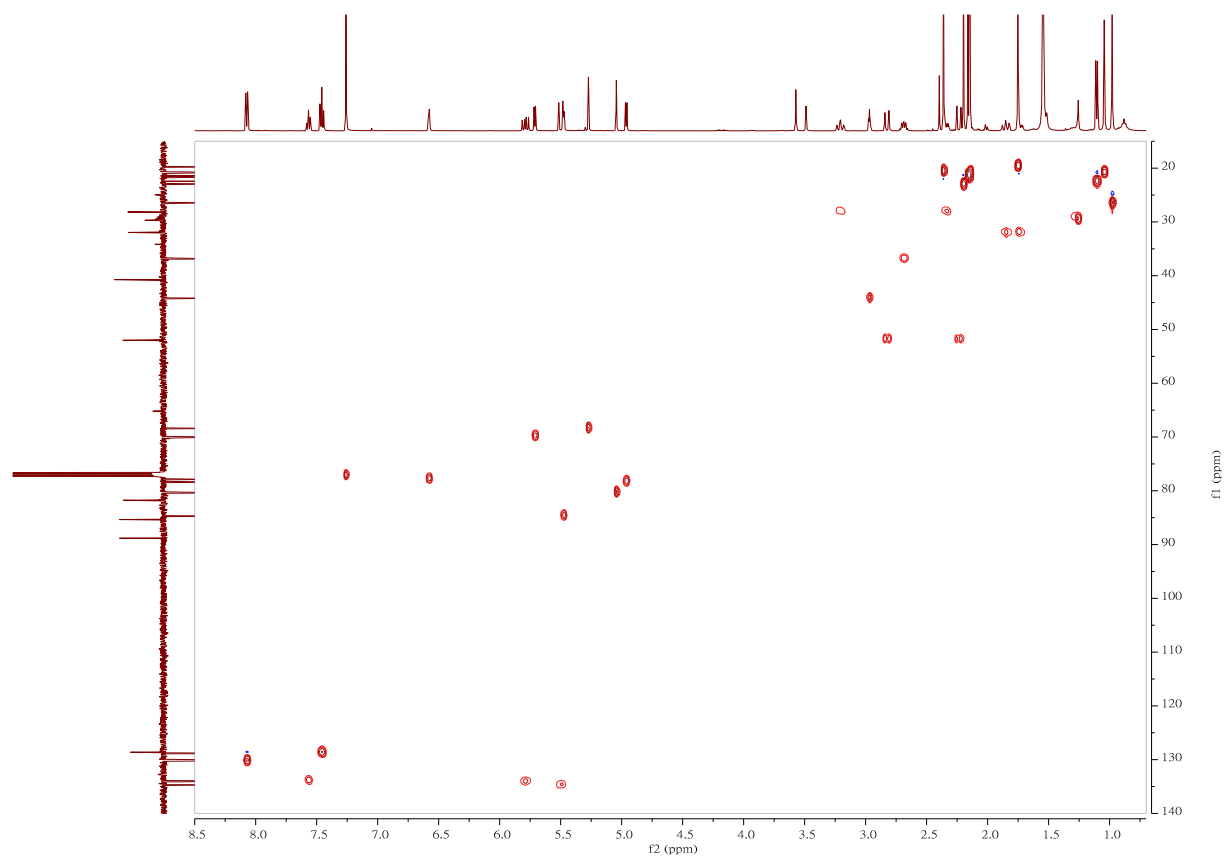

**Figure S59.** The HSQC spectrum of isoterracinolide C (9).

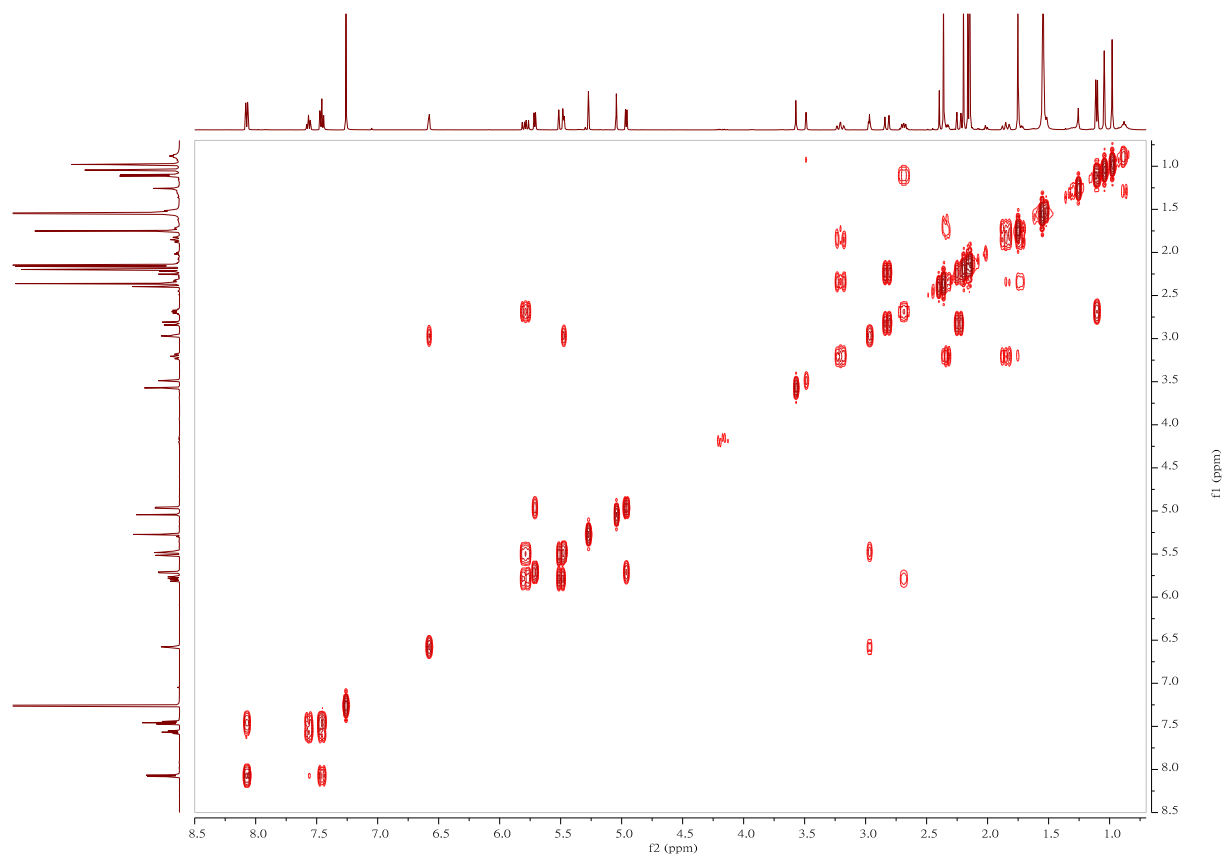

**Figure S60.** The  $^1\text{H}$ - $^1\text{H}$  COSY spectrum of isoterracinolide C (9).

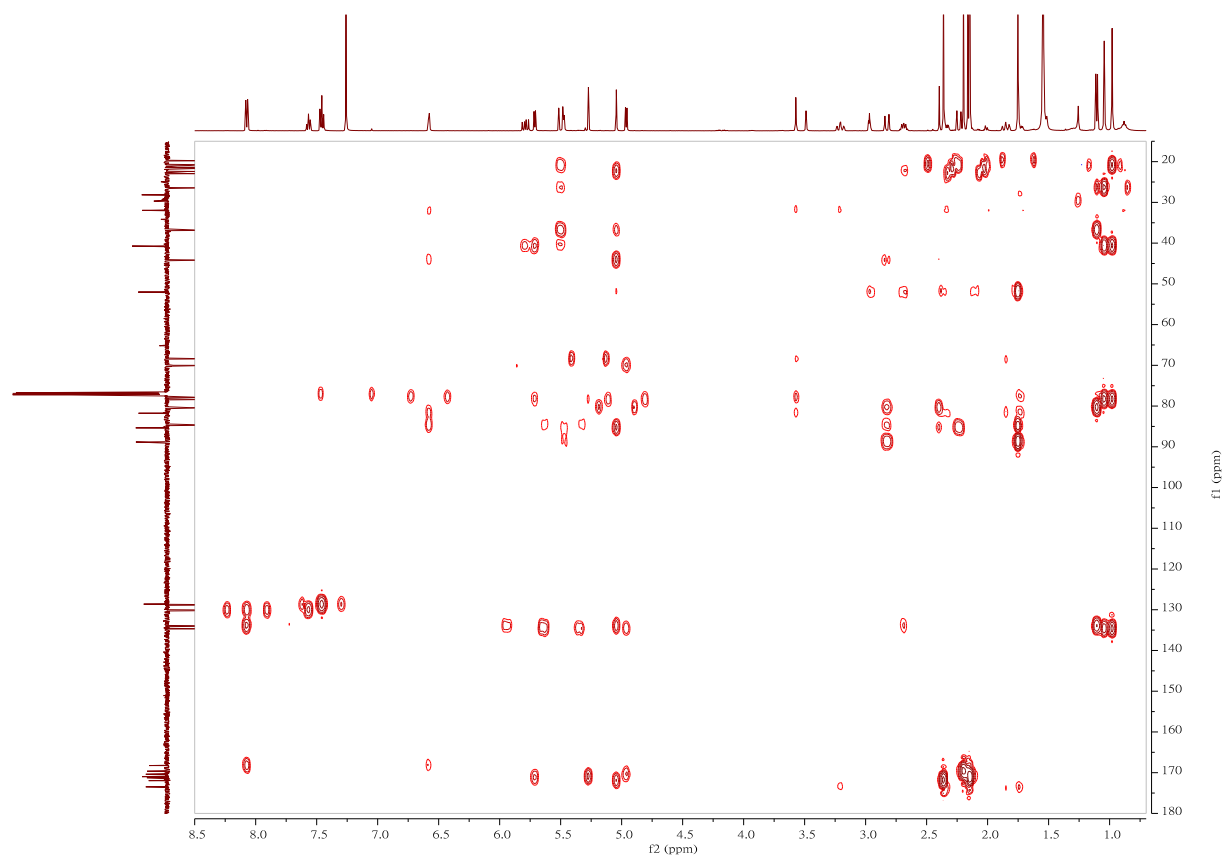

**Figure S61.** The HMBC spectrum of isoterracinolide C (**9**).

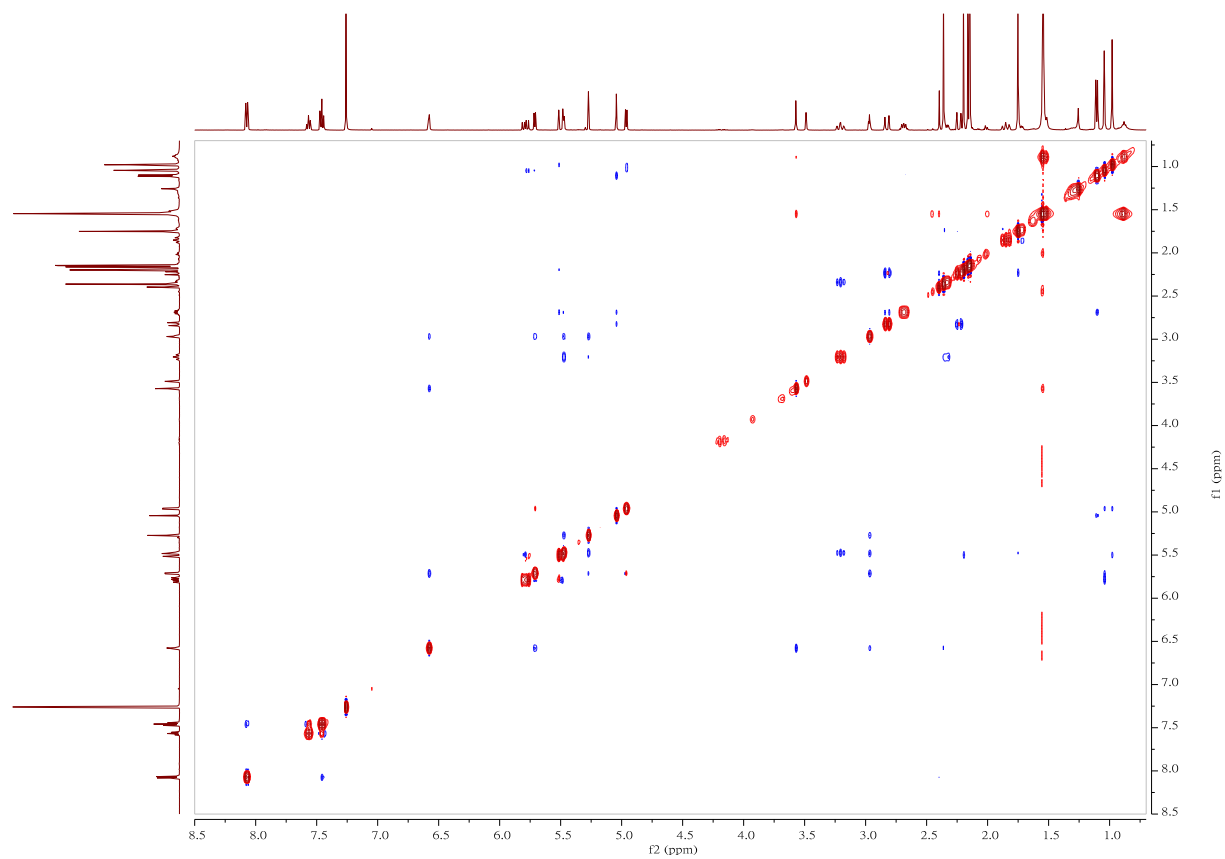

**Figure S62.** The NOESY spectrum of isoterracinolide C (**9**).

YC-20200917 #3245-3285 RT: 16.67-16.87 AV: 41 NL: 7.04E5  
T: FTMS + p ESI Full lock ms [100.0000-1000.0000]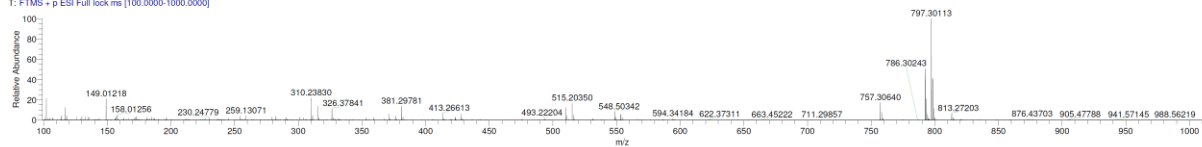YC-20200917 #3245-3285 RT: 16.67-16.87 AV: 41 NL: 7.04E5  
T: FTMS + p ESI Full lock ms [100.0000-1000.0000]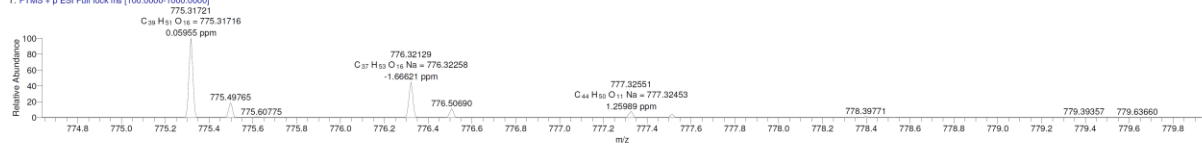YC-20200917 #3245-3285 RT: 16.67-16.87 AV: 41 NL: 1.26E8  
T: FTMS + p ESI Full lock ms [100.0000-1000.0000]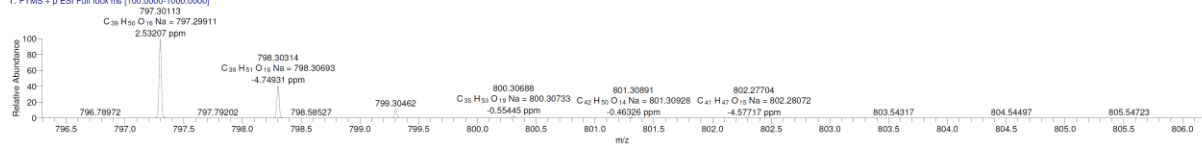

C39H50O16 +H: C39 H51 O16 p1gms, s/p:40) Chrg 1R: ...

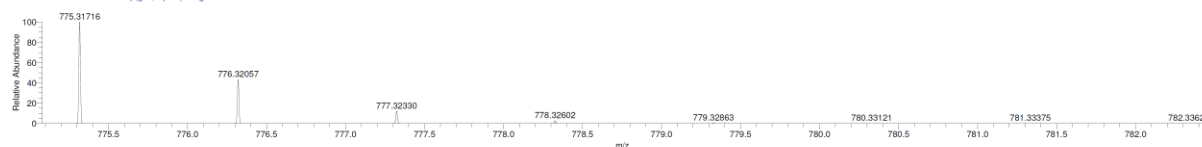

C39H50O16 +Na: C39 H50 O16 Na1 p1gms, s/p:40) Chrg 1...

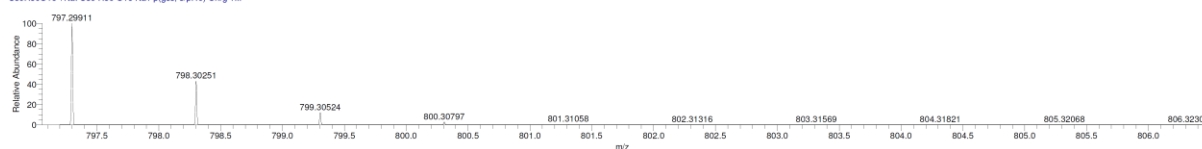

Figure S63. The HR-ESI-MS spectra of isoterracinolide C (9).

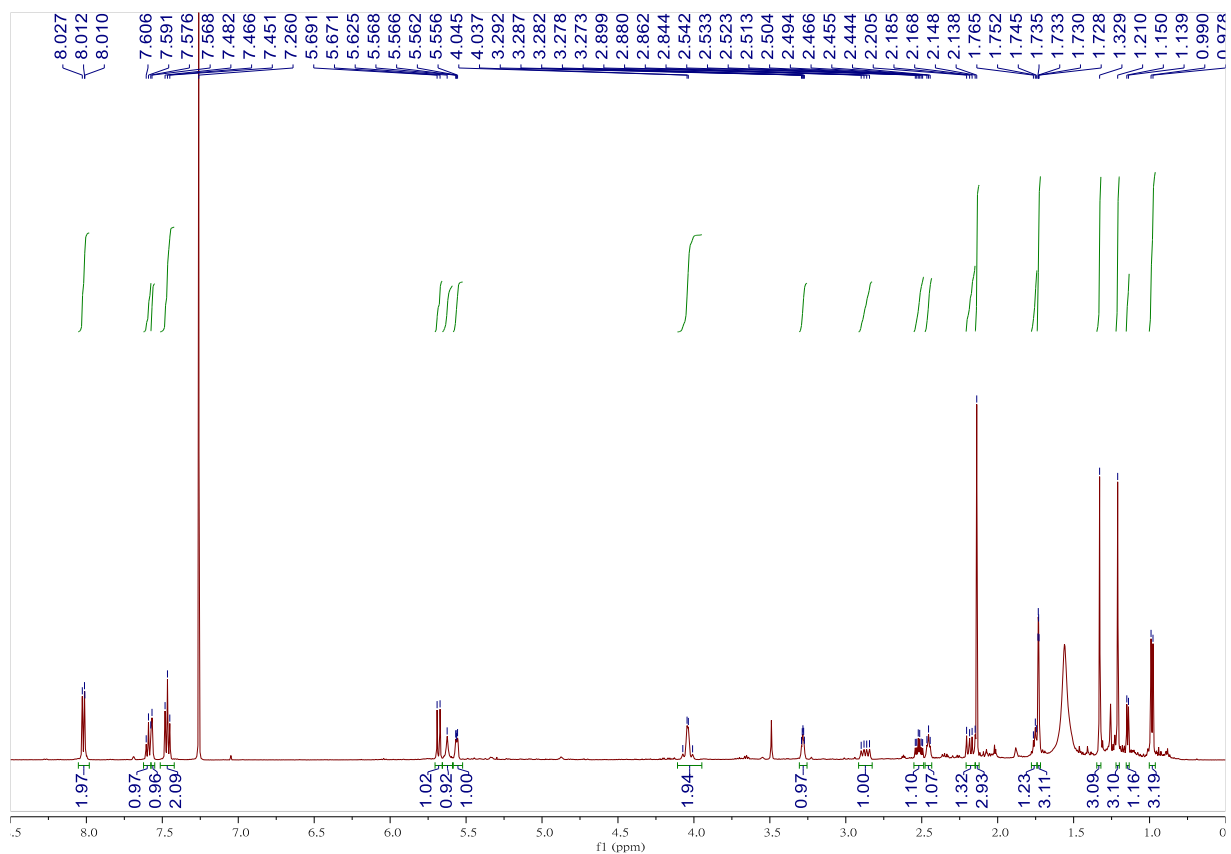

**Figure S64.** The <sup>1</sup>H-NMR spectrum of 4β-crotignoid K (**14**) (500 MHz, CDCl<sub>3</sub>).

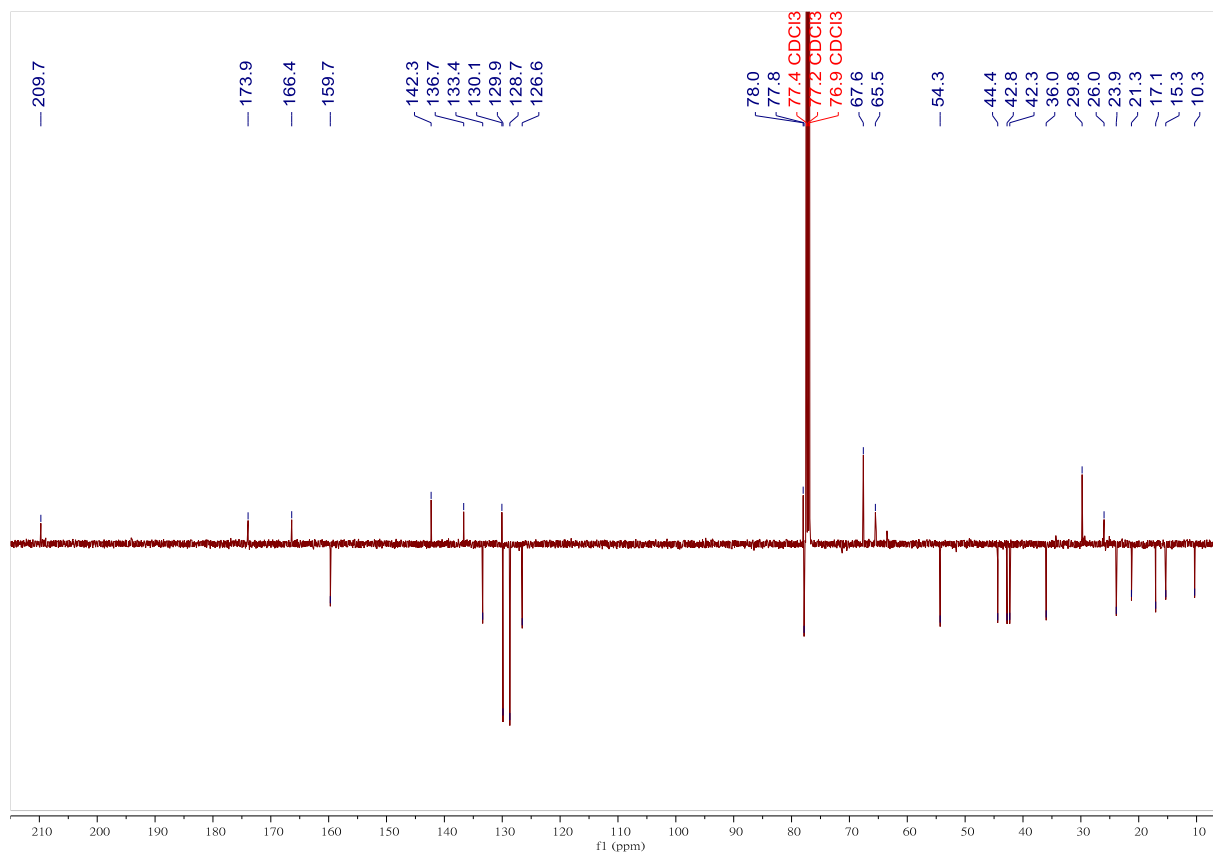

**Figure S65.** The <sup>13</sup>C-JMOD spectrum of 4β-crotignoid K (**14**) (125 MHz, CDCl<sub>3</sub>).

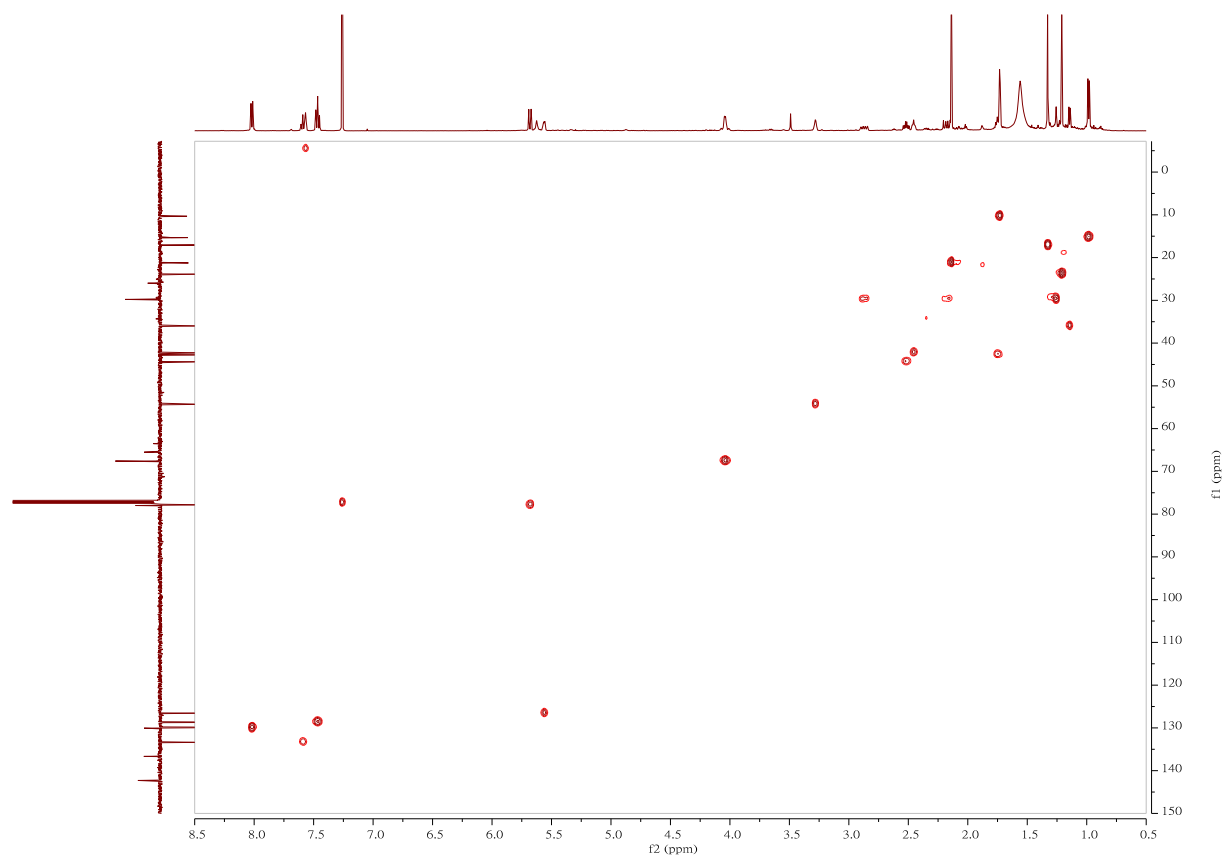

**Figure S66.** The HSQC spectrum of 4 $\beta$ -crotignoid K (**14**).

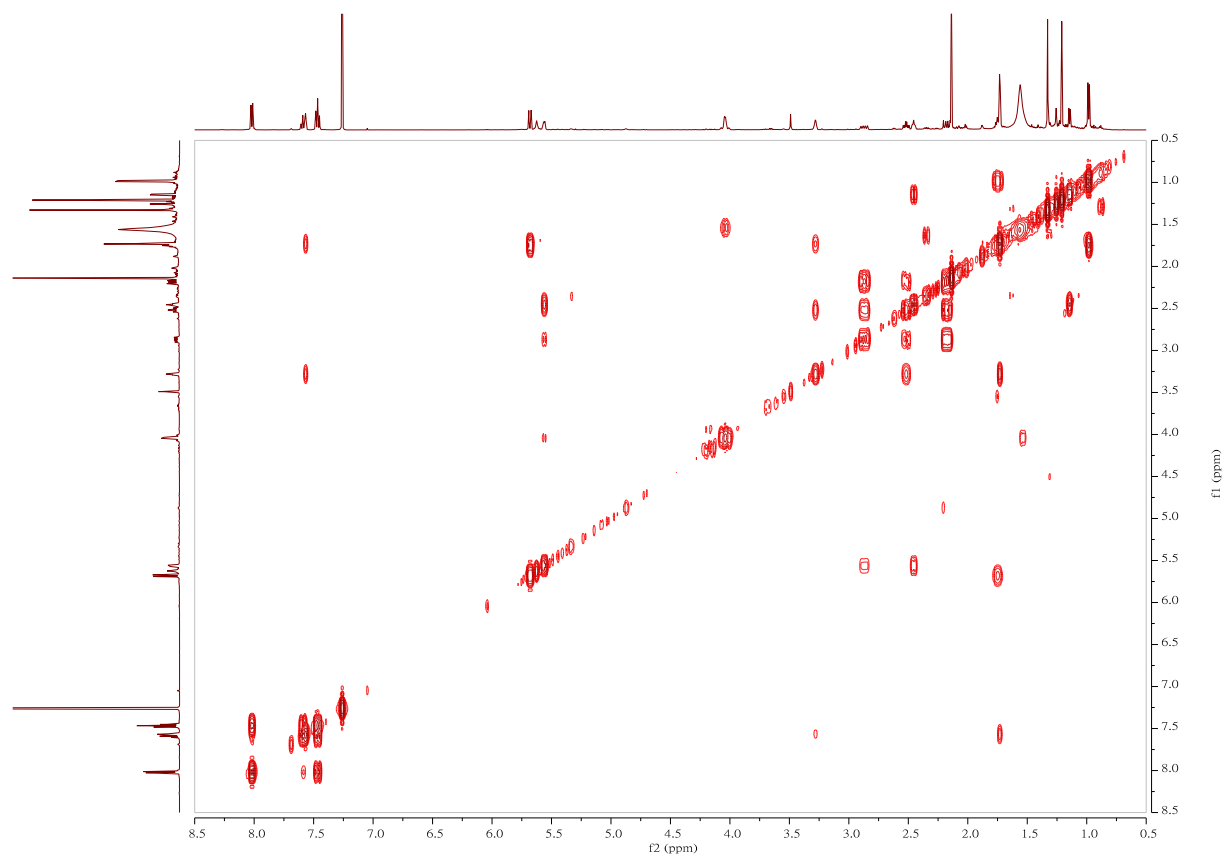

**Figure S67.** The  $^1\text{H}$ - $^1\text{H}$  COSY spectrum of 4 $\beta$ -crotignoid K (**14**).



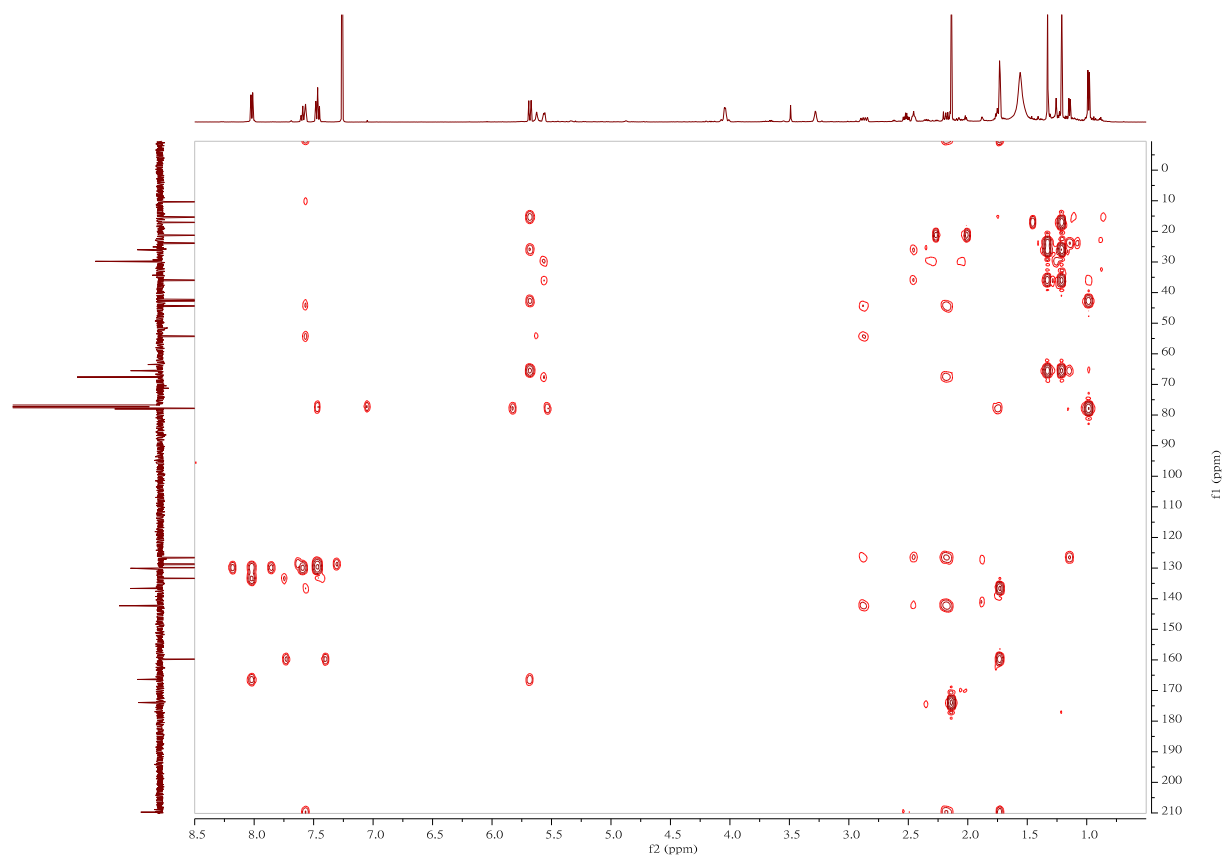

**Figure S68.** The HMBC spectrum of 4 $\beta$ -crotignoid K (**14**).

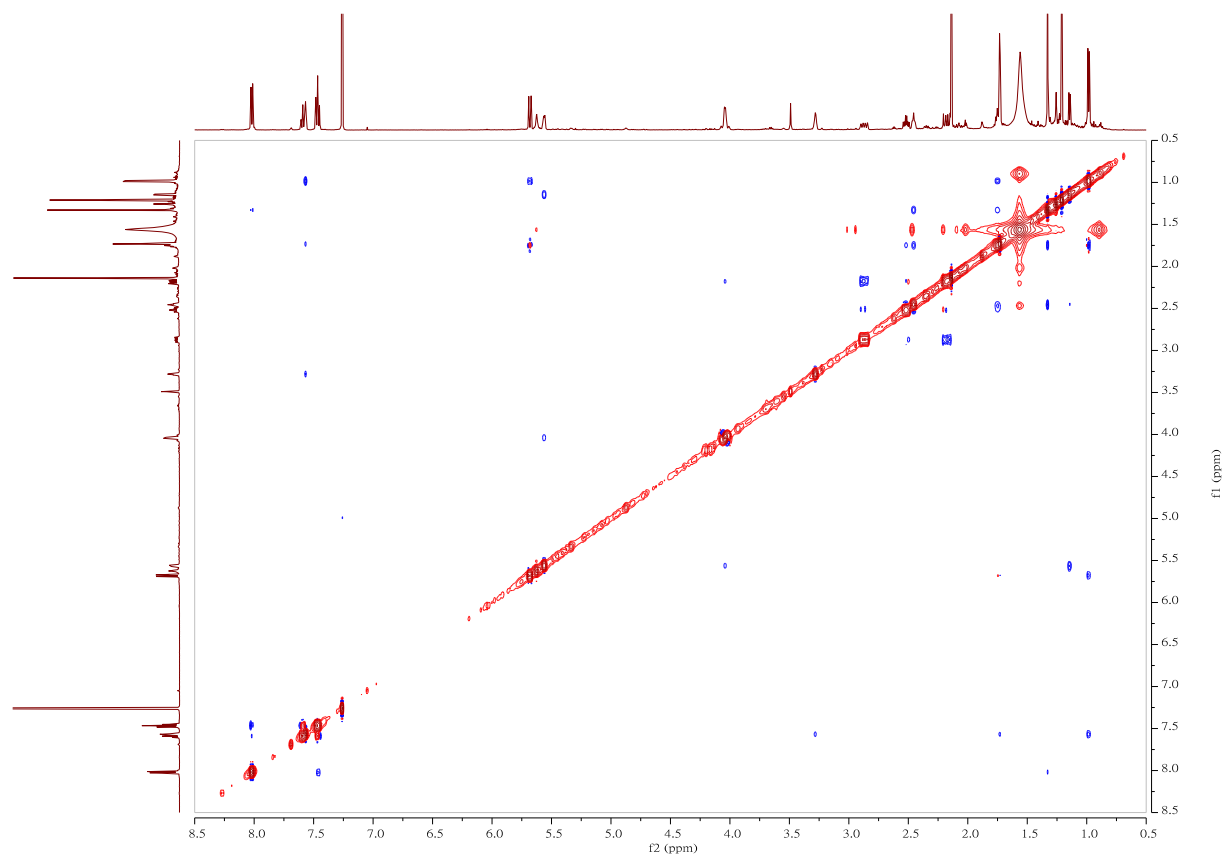

**Figure S69.** The NOESY spectrum of 4 $\beta$ -crotignoid K (**14**).

YC-20200917 #4248-4285 RT: 21.82-22.01 AV: 38 NL: 1.09E8  
T: FTMS + p ESI Full lock ms [100.0000-1000.0000]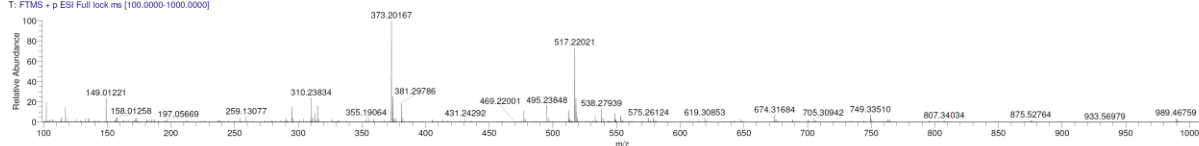YC-20200917 #4248-4285 RT: 21.82-22.01 AV: 38 NL: 1.78E7  
T: FTMS + p ESI Full lock ms [100.0000-1000.0000]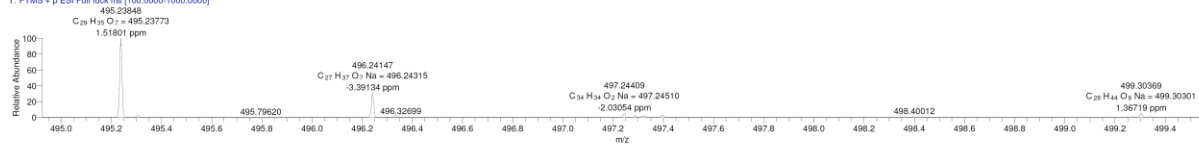YC-20200917 #4248-4285 RT: 21.82-22.01 AV: 38 NL: 8.03E7  
T: FTMS + p ESI Full lock ms [100.0000-1000.0000]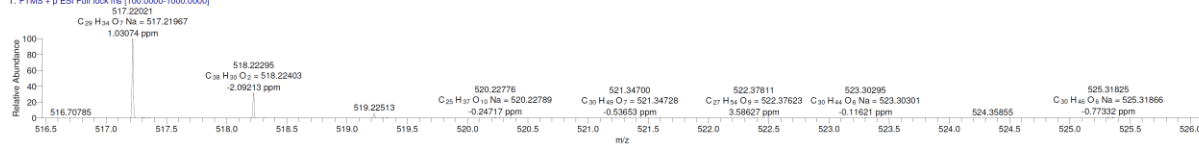

C29H34O7 +H: C29 H35 O7 [p(gss, s/p:40) Chrg 1R: 70...

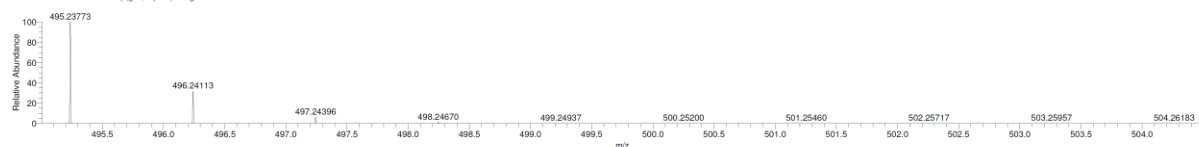

C29H34O7 +Na: C29 H34 O7 Na1 [p(gss, s/p:40) Chrg 1...

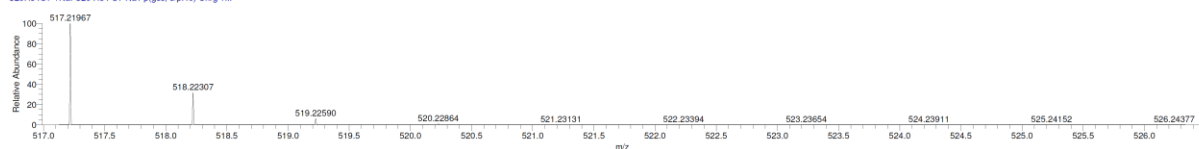

Figure S70. The HR-ESI-MS spectra of 4 $\beta$ -crotigroid K (14).

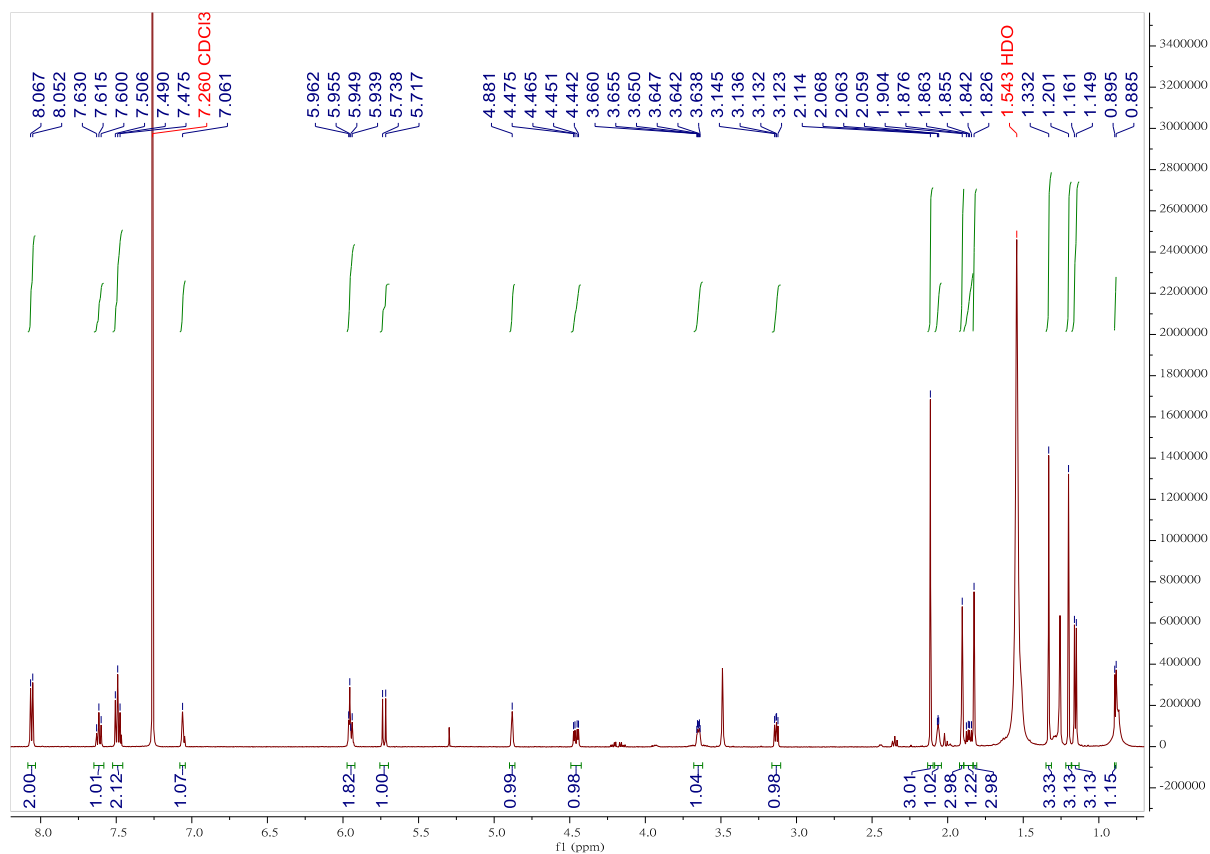

**Figure S71.** The <sup>1</sup>H-NMR spectrum of euphodendriane B (**15**) (500 MHz, CDCl<sub>3</sub>).

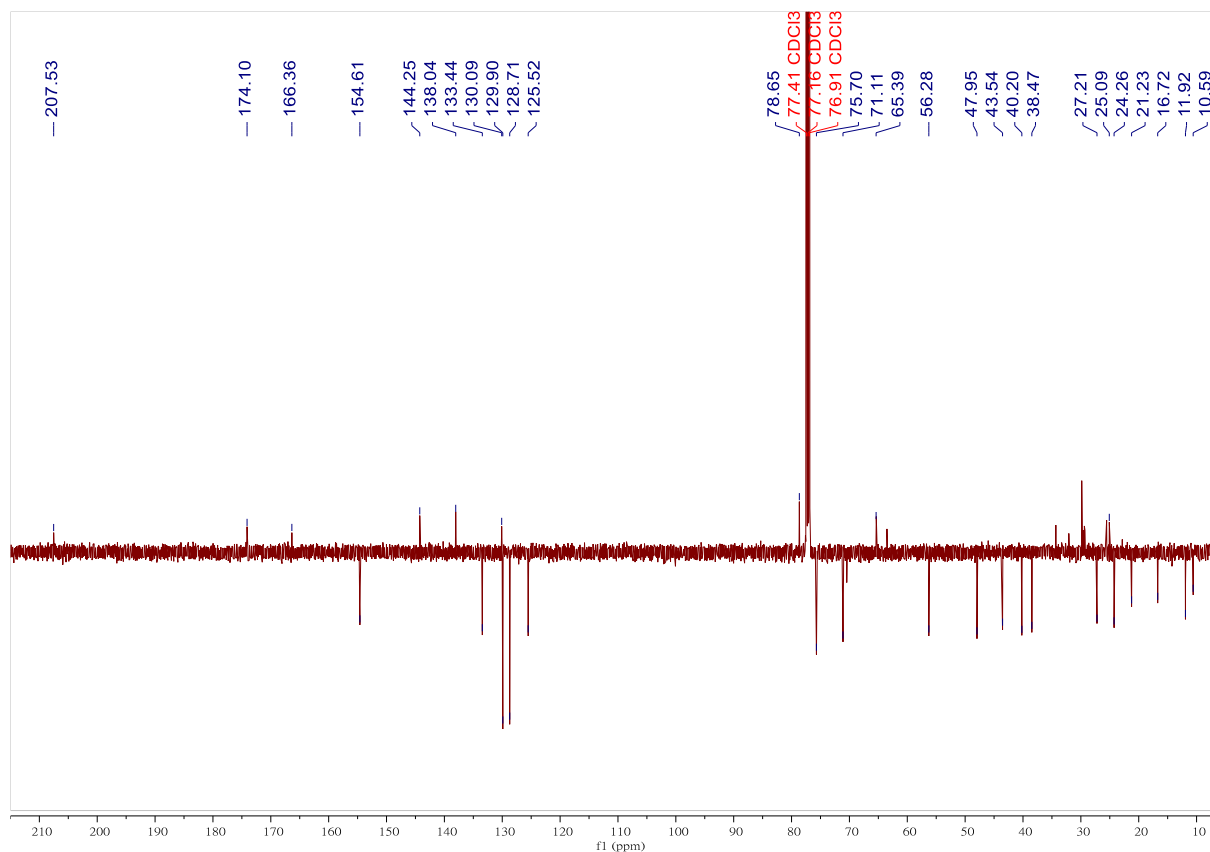

**Figure S72.** The <sup>13</sup>C-JMOD spectrum of euphodendriane B (**15**) (125 MHz, CDCl<sub>3</sub>).

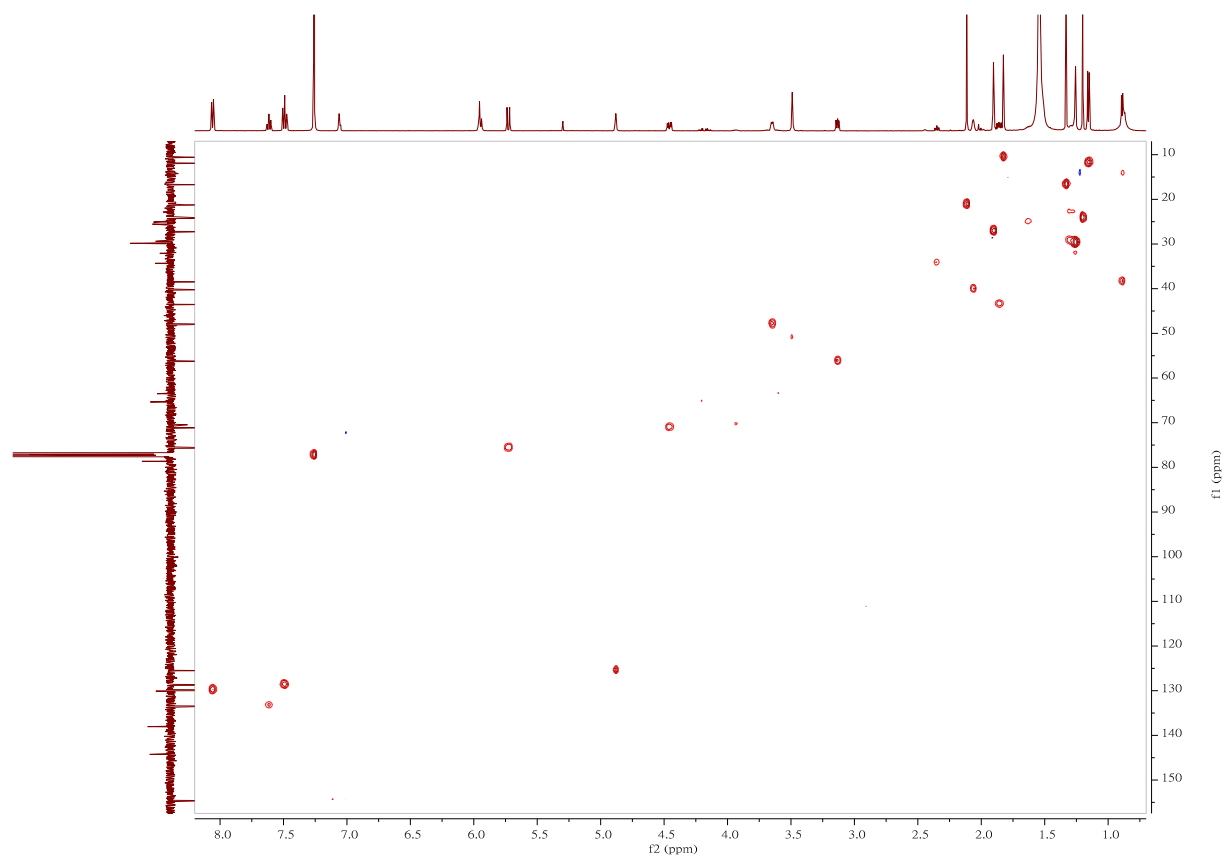

**Figure S73.** The HSQC spectrum of euphodendriane B (15).

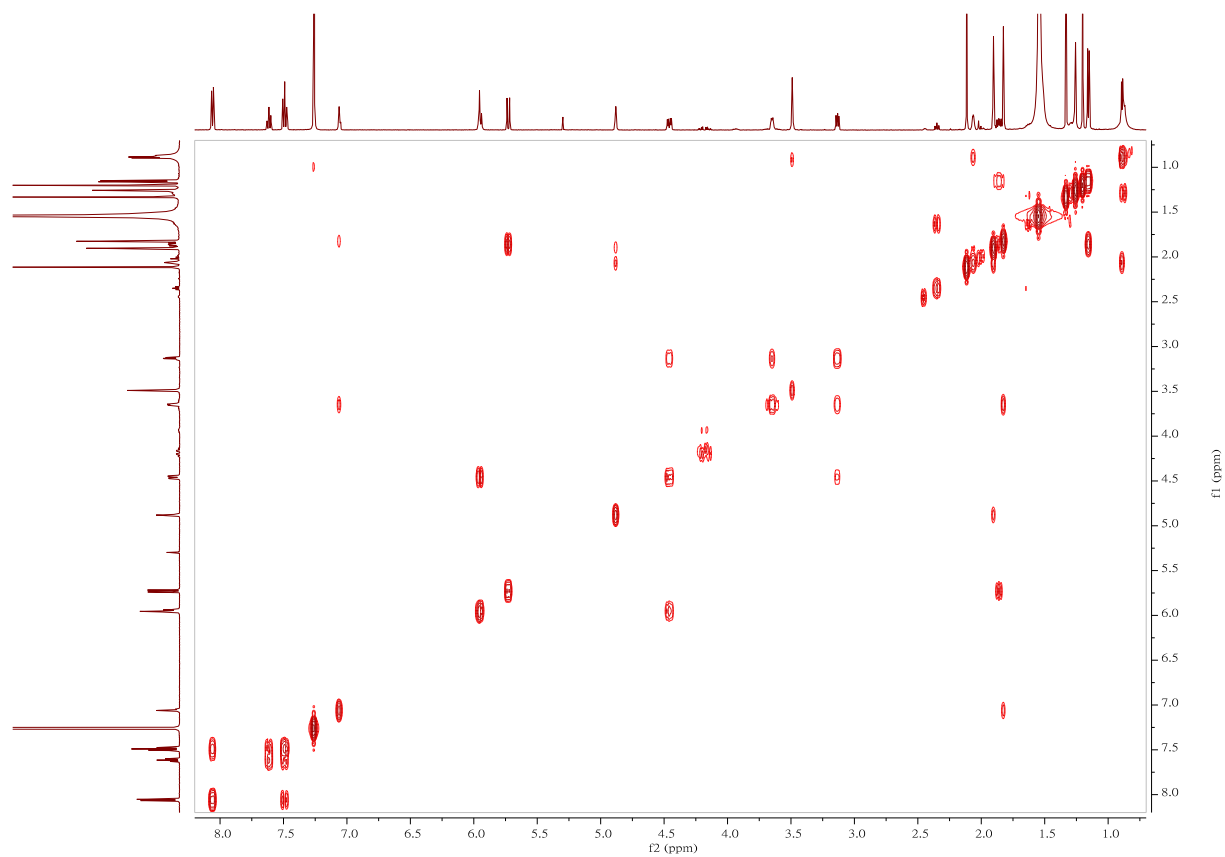

**Figure S74.** The  $^1\text{H}$ - $^1\text{H}$  COSY spectrum of euphodendriane B (15).

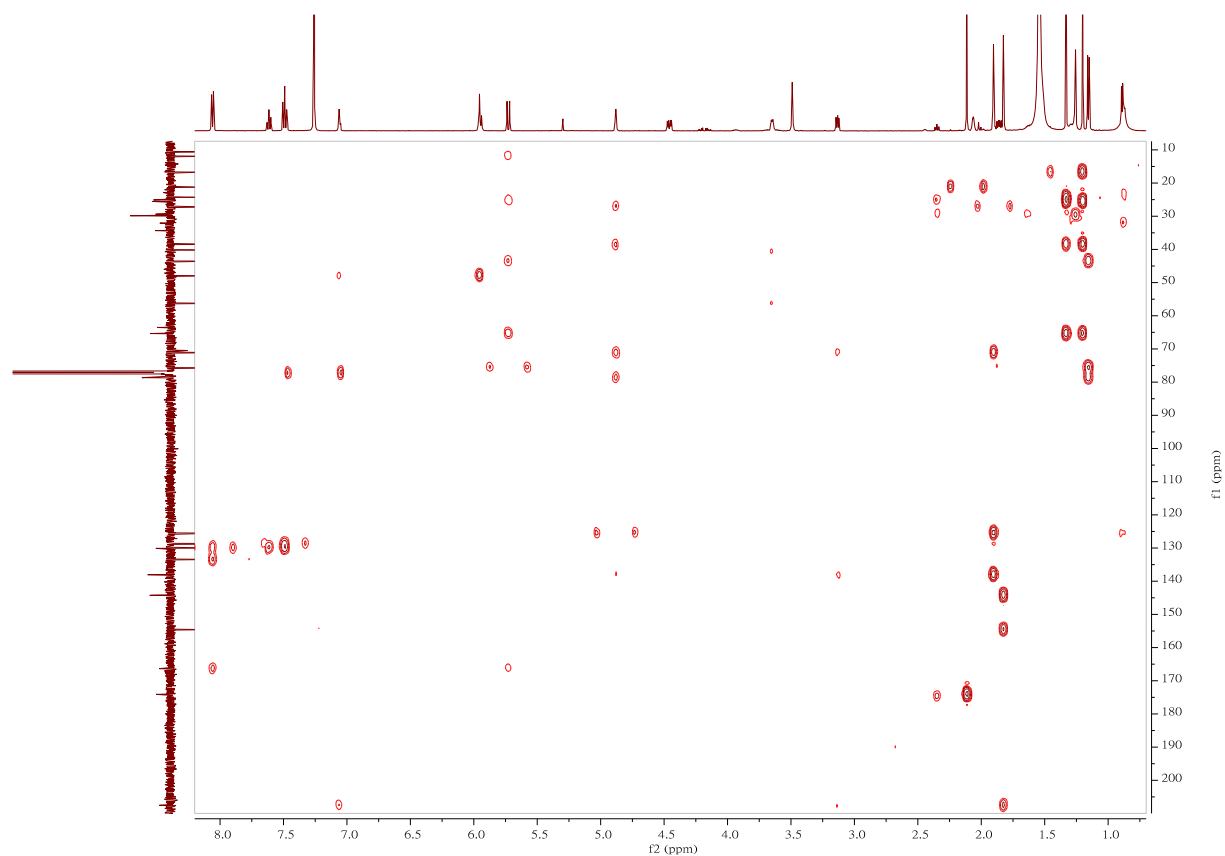

**Figure S75.** The HMBC spectrum of euphodendriane B (15).

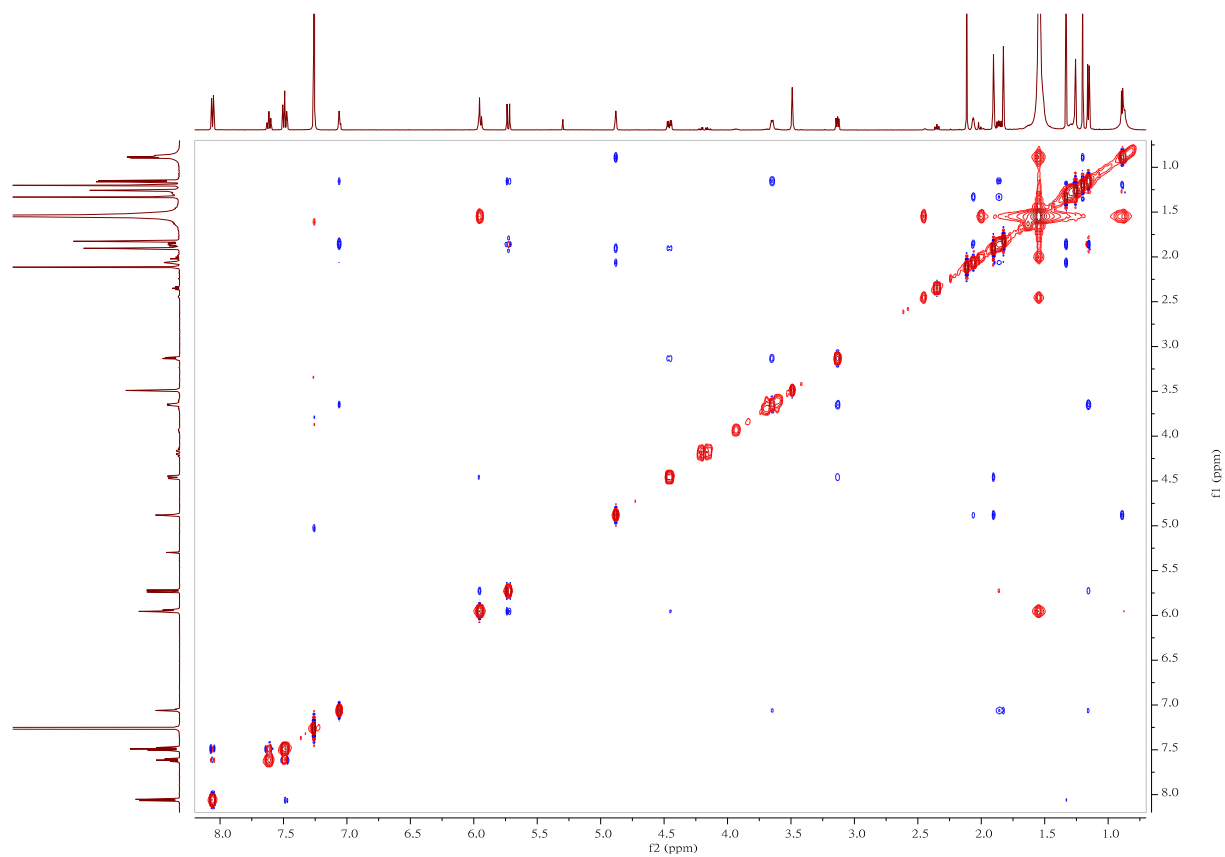

**Figure S76.** The NOESY spectrum of euphodendriane B (15).

YC-20200917 #3053-3075 RT: 15.68-15.79 AV: 23 NL: 2.45E8  
T: FTMS + p ESI Full lock ms [100.0000-1000.0000]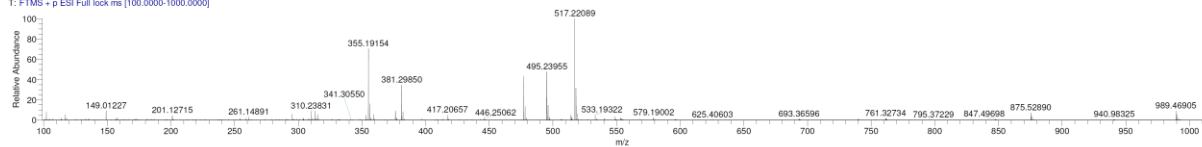YC-20200917 #3053-3075 RT: 15.68-15.79 AV: 23 NL: 1.17E8  
T: FTMS + p ESI Full lock ms [100.0000-1000.0000]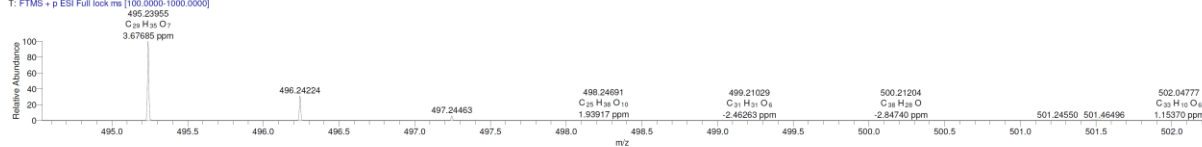YC-20200917 #3053-3075 RT: 15.68-15.79 AV: 23 NL: 2.45E8  
T: FTMS + p ESI Full lock ms [100.0000-1000.0000]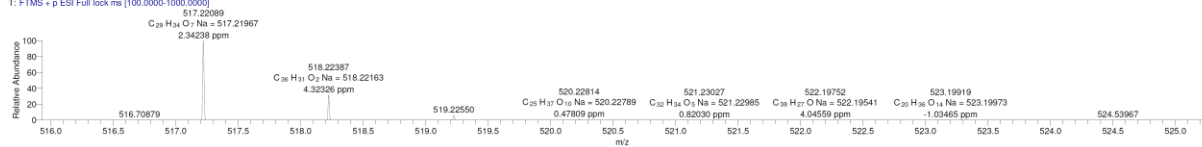

C29H34O7 +H: C29 H35 O7 p(gss, s/p:40) Chrg 1R: 70...

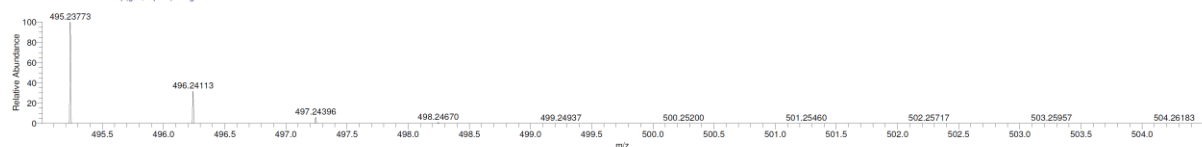

C29H34O7 +Na: C29 H34 O7 Na1 p(gss, s/p:40) Chrg 1...

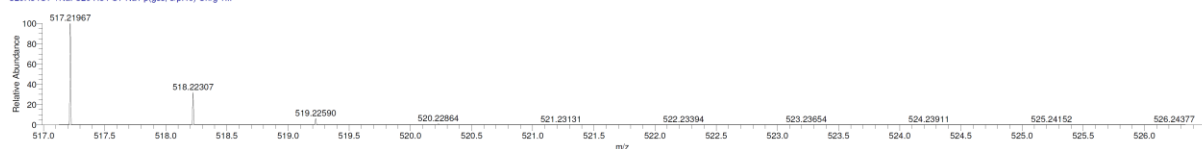

Figure S77. The HR-ESI-MS spectra of euphodendriane B (15).

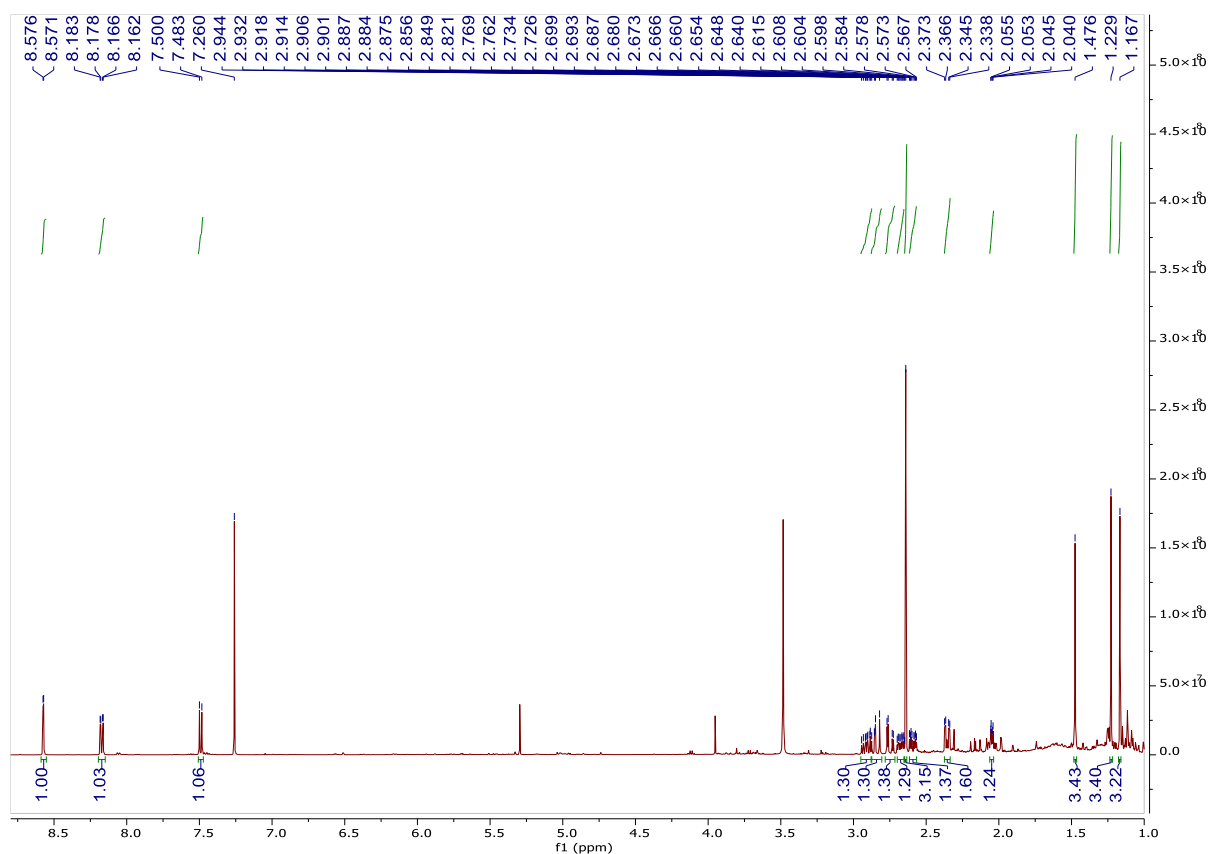

**Figure S78.** The  $^1\text{H}$ -NMR spectrum of 16-nor-abieta-8,11,13-trien-3,7,15-trione (**16**) (500 MHz,  $\text{CDCl}_3$ ).

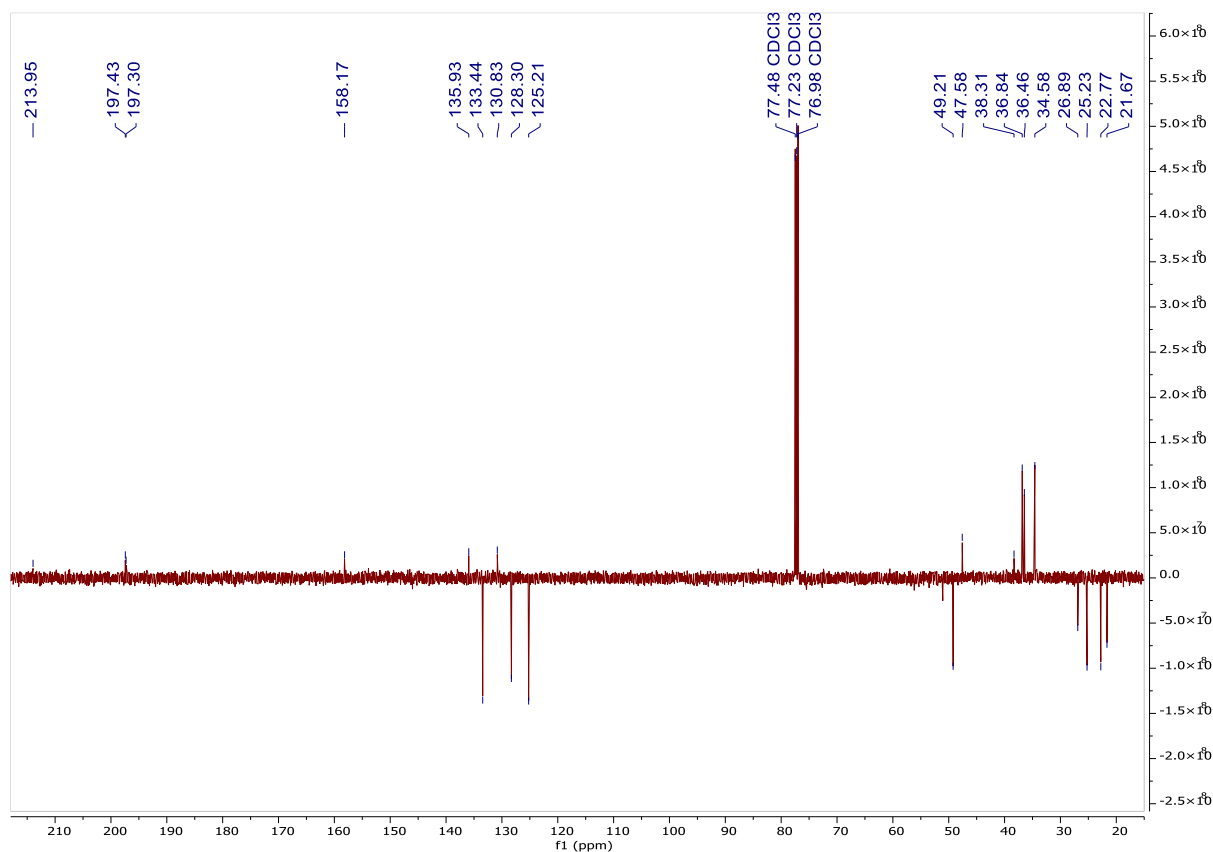

**Figure S79.** The  $^{13}\text{C}$ -JMOD spectrum of 16-nor-abieta-8,11,13-trien-3,7,15-trione (**16**) (125 MHz,  $\text{CDCl}_3$ ).

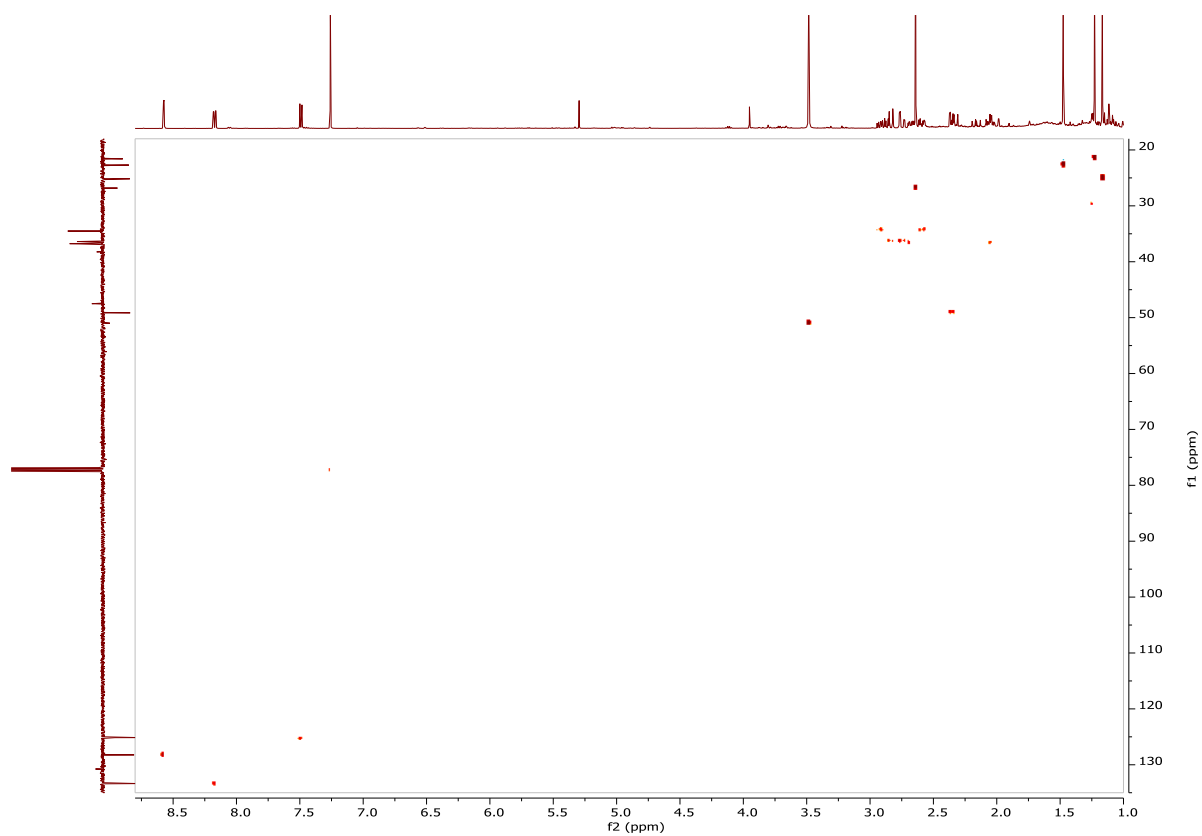

**Figure S80.** The HSQC spectrum of 16-nor-abieta-8,11,13-trien-3,7,15-trione (**16**).

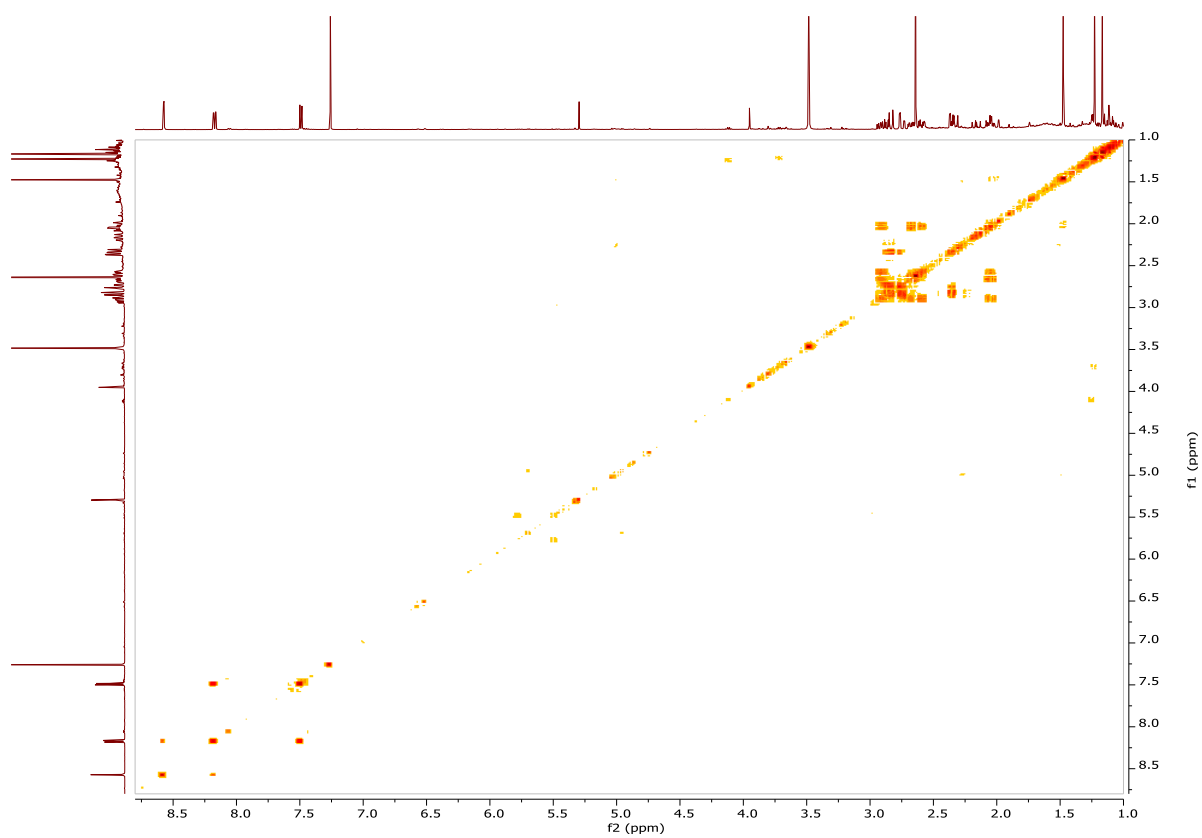

**Figure S81.** The  $^1\text{H}$ - $^1\text{H}$  COSY spectrum of 16-nor-abieta-8,11,13-trien-3,7,15-trione (**16**).



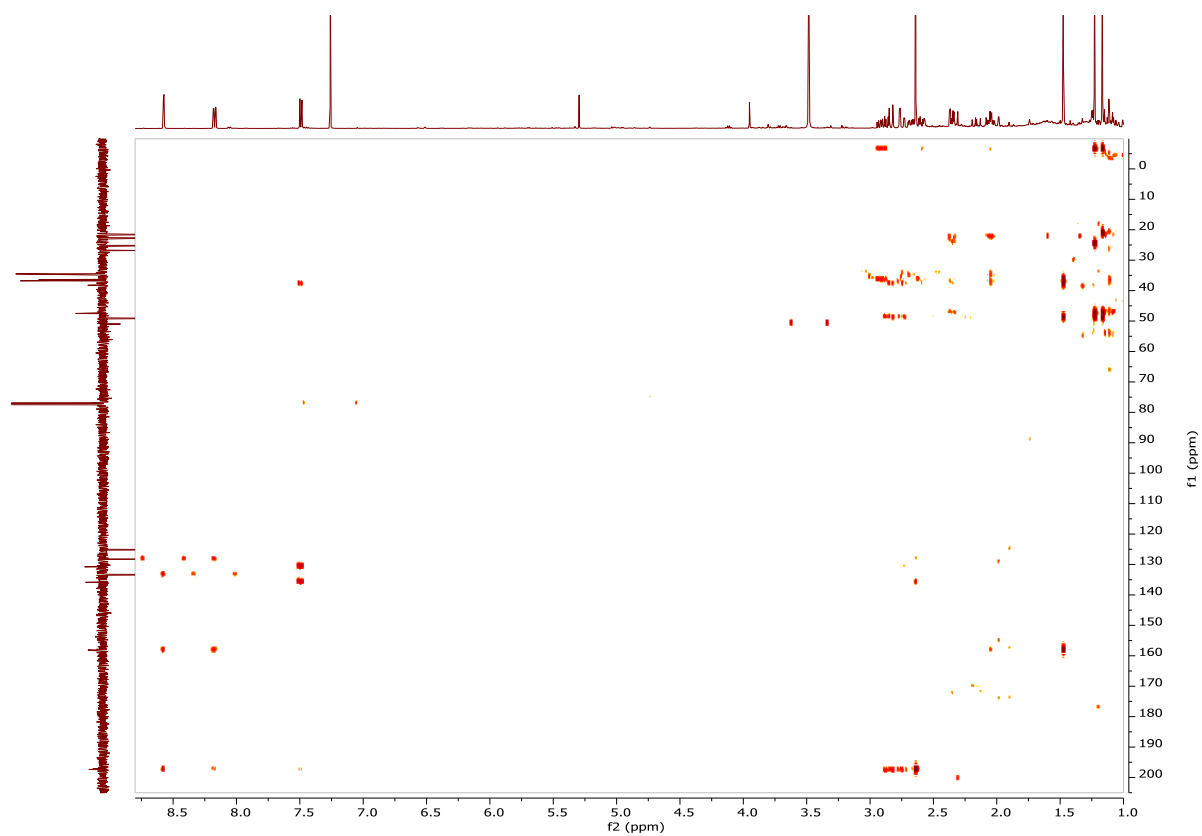

**Figure S82.** The HMBC spectrum of 16-nor-abieta-8,11,13-trien-3,7,15-trione (**16**).

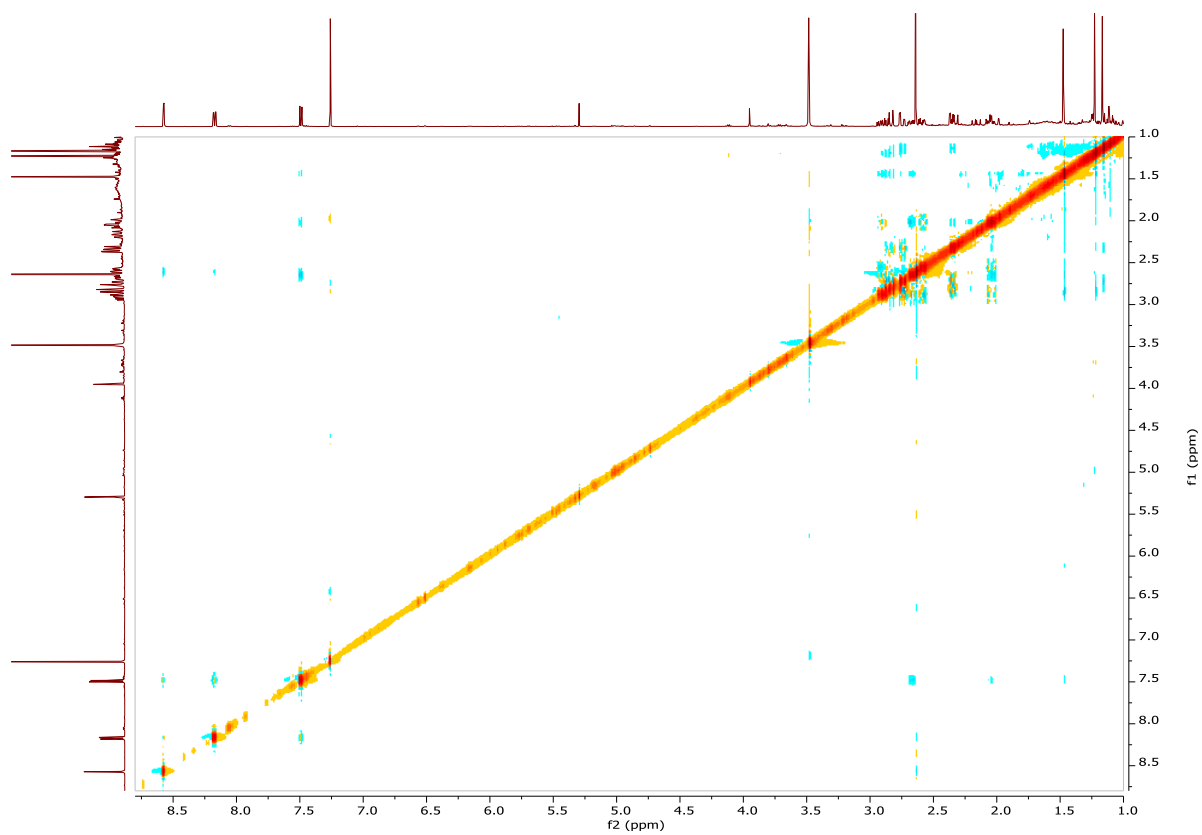

**Figure S83.** The NOESY spectrum of 16-nor-abieta-8,11,13-trien-3,7,15-trione (**16**).

YC-20200917 #182-227 RT: 0.93-1.16 AV: 43 NL: 1.55E8  
T: FTMS + p ESI Full lock ms [100.0000-1000.0000]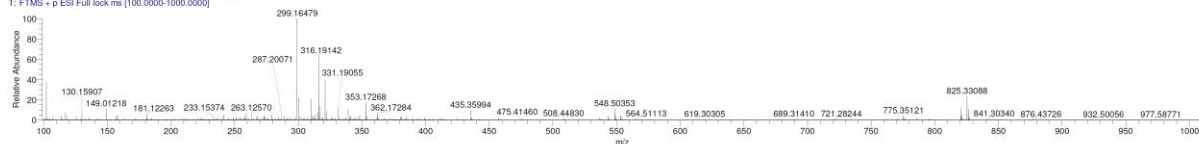YC-20200917 #182-227 RT: 0.93-1.16 AV: 43 NL: 1.55E8  
T: FTMS + p ESI Full lock ms [100.0000-1000.0000]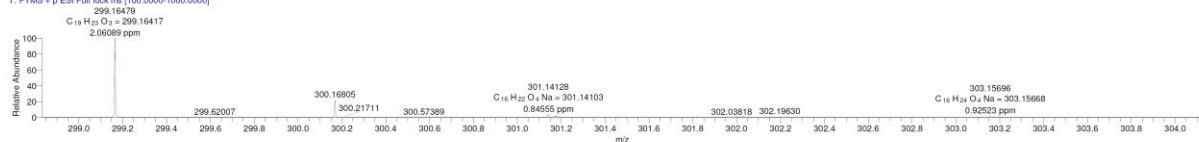YC-20200917 #182-227 RT: 0.93-1.16 AV: 43 NL: 6.04E7  
T: FTMS + p ESI Full lock ms [100.0000-1000.0000]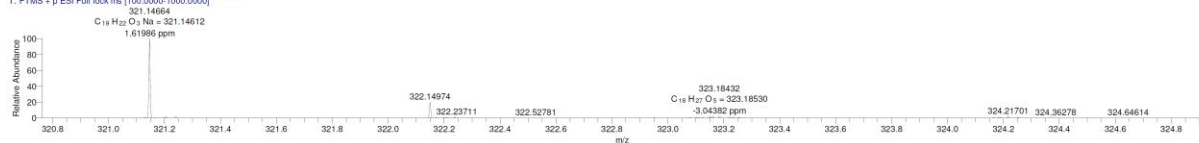

C19H22O3 +Na: C19H22O3 Na1 p(gss, s/p-40) Chg 1...

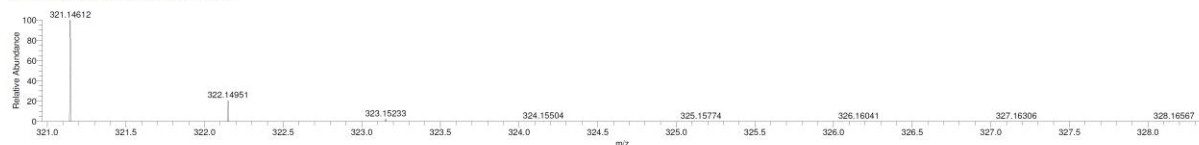

C19H22O3 +Na: C19H22O3 Na1 p(gss, s/p-40) Chg 1...

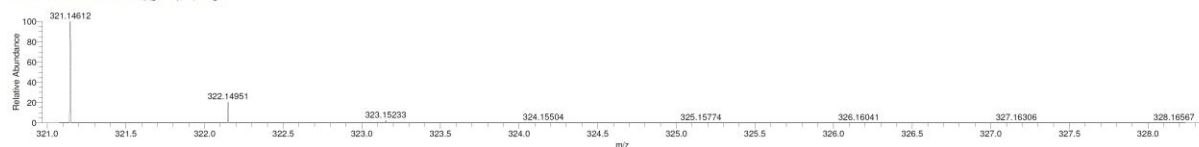

**Figure S84.** The HR-ESI-MS spectra of 16-nor-abieta-8,11,13-trien-3,7,15-trione (**16**).

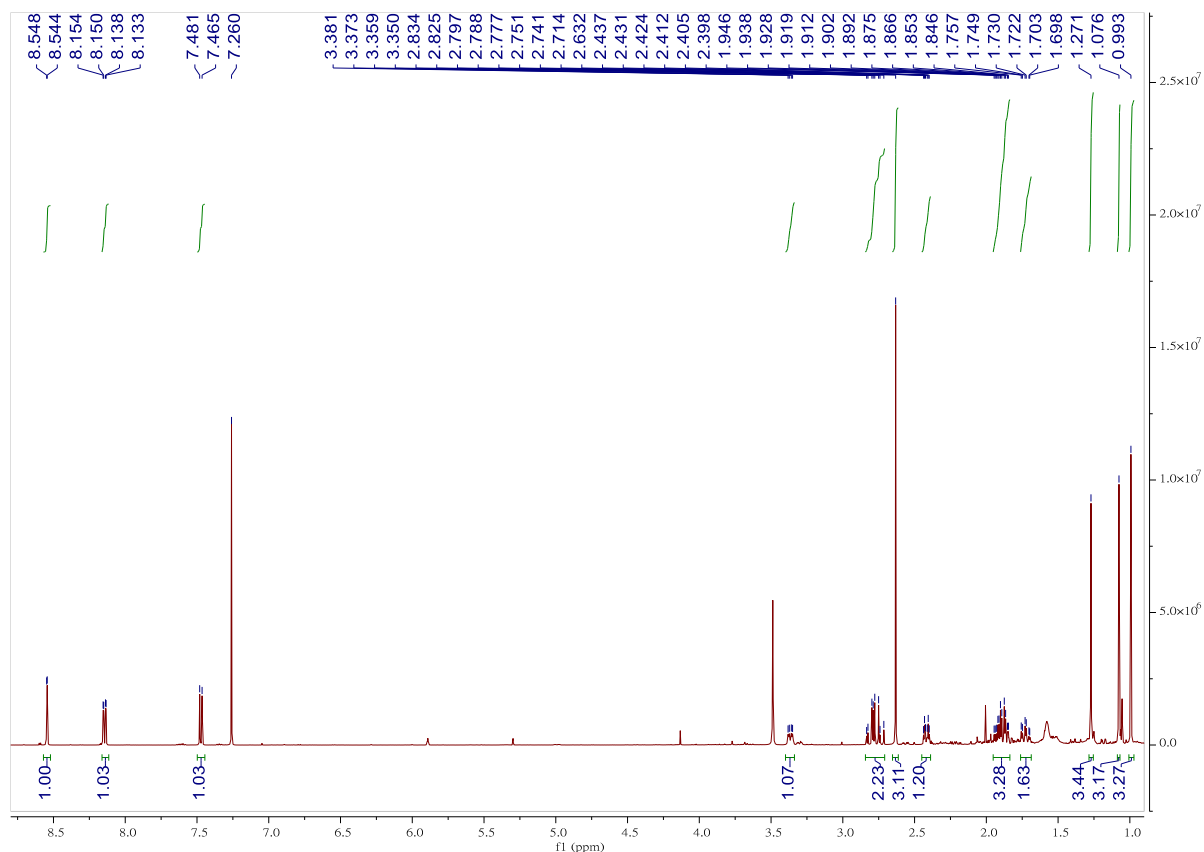

**Figure S85.** The <sup>1</sup>H-NMR spectrum of 16-nor-3 $\beta$ -hydroxy-abieta-8,11,13-trien-7,15-dione (**17**) (500 MHz, CDCl<sub>3</sub>).

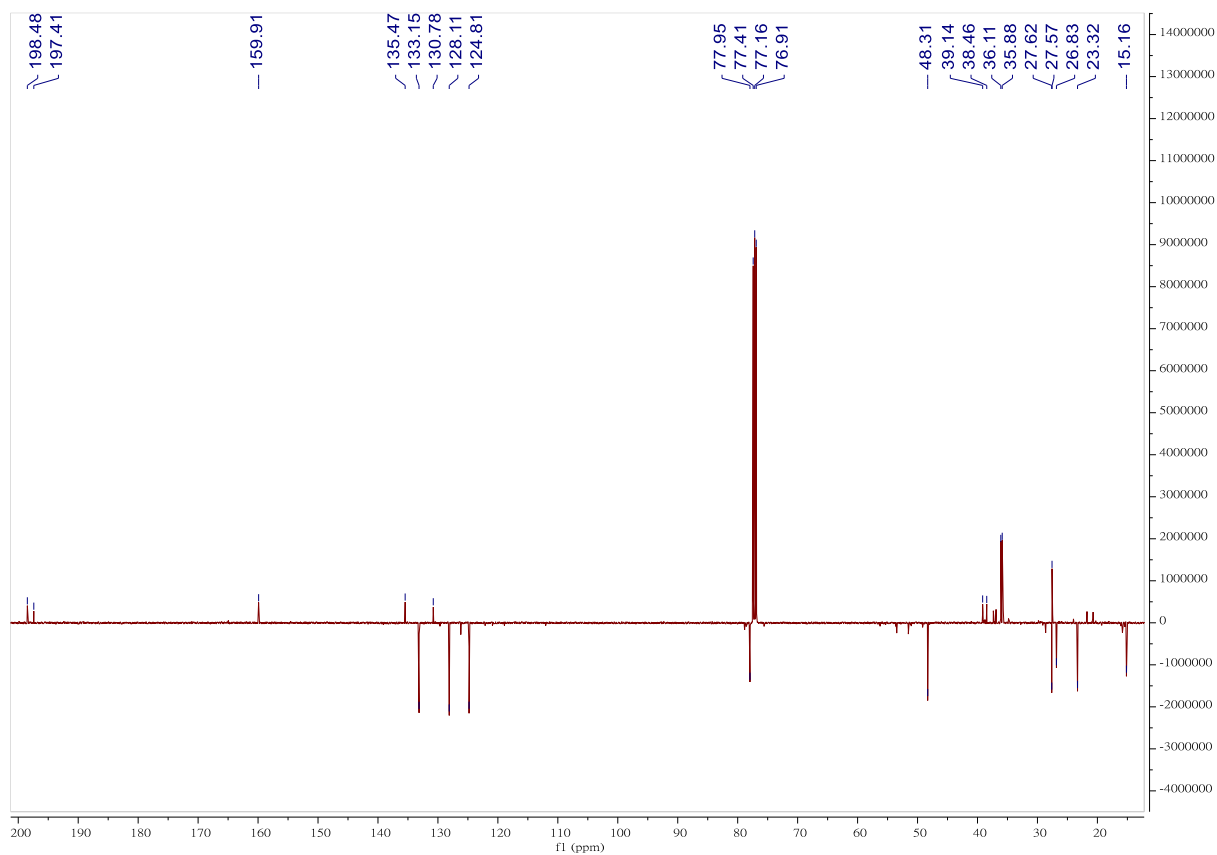

**Figure S86.** The <sup>13</sup>C-JMOD spectrum of 16-nor-3 $\beta$ -hydroxy-abieta-8,11,13-trien-7,15-dione (**17**) (125 MHz, CDCl<sub>3</sub>).

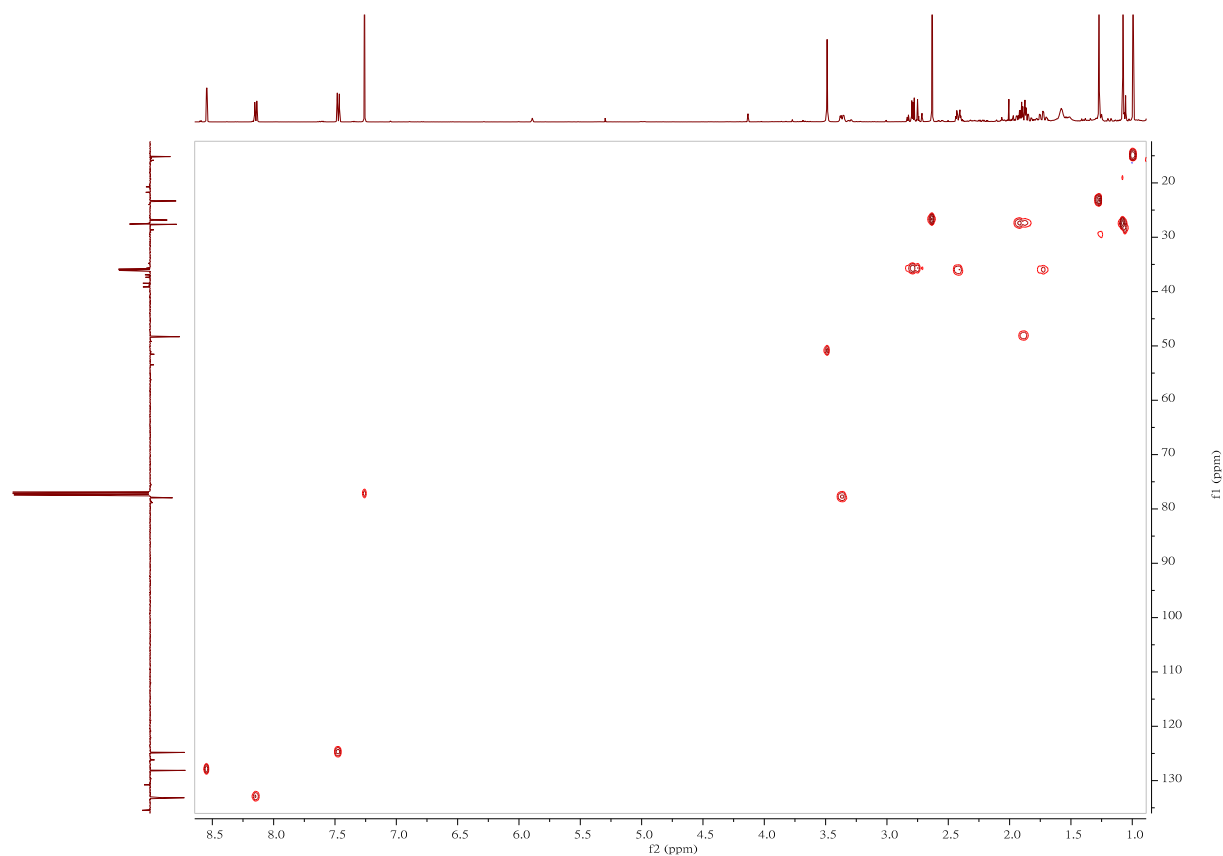

**Figure S87.** The HSQC spectrum of 16-nor-3 $\beta$ -hydroxy-abieta-8,11,13-trien-7,15-dione (**17**).

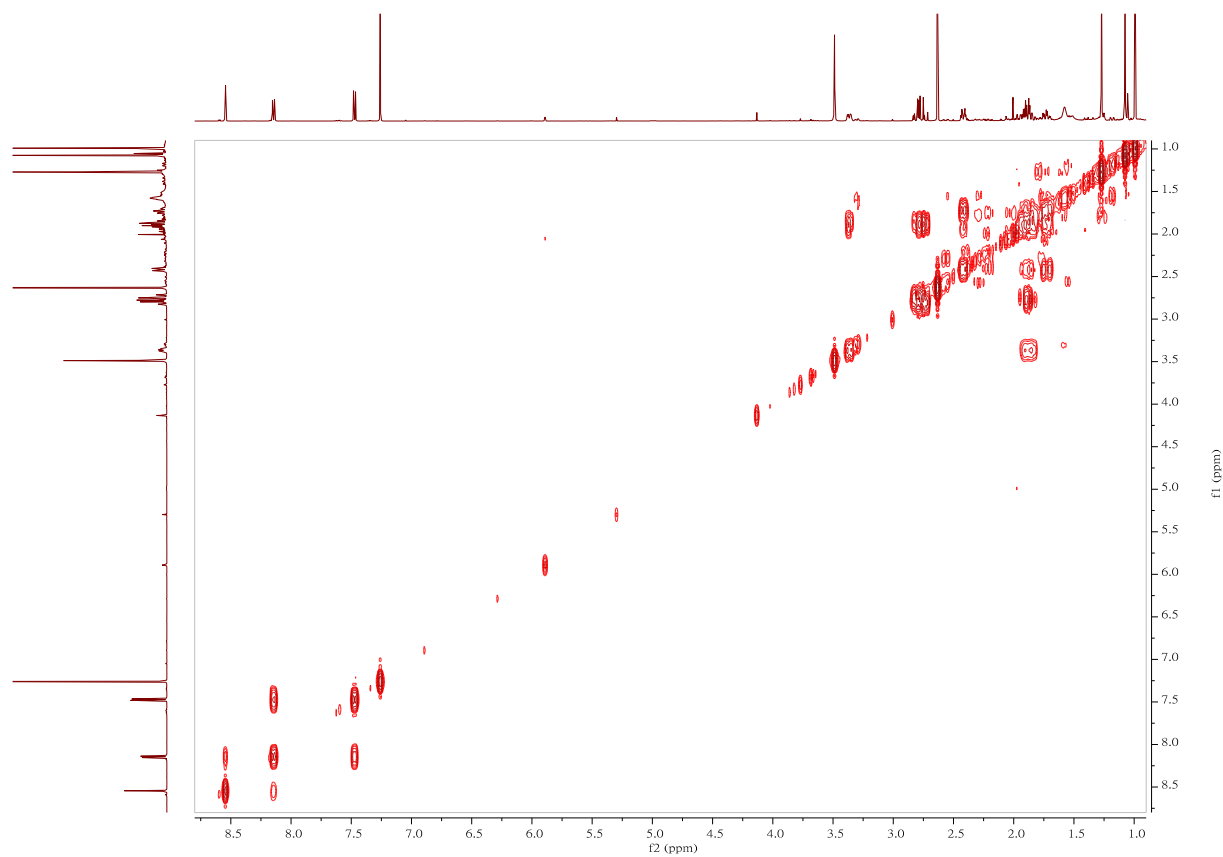

**Figure S88.** The <sup>1</sup>H-<sup>1</sup>H COSY spectrum of 16-nor-3 $\beta$ -hydroxy-abieta-8,11,13-trien-7,15-dione (**17**).

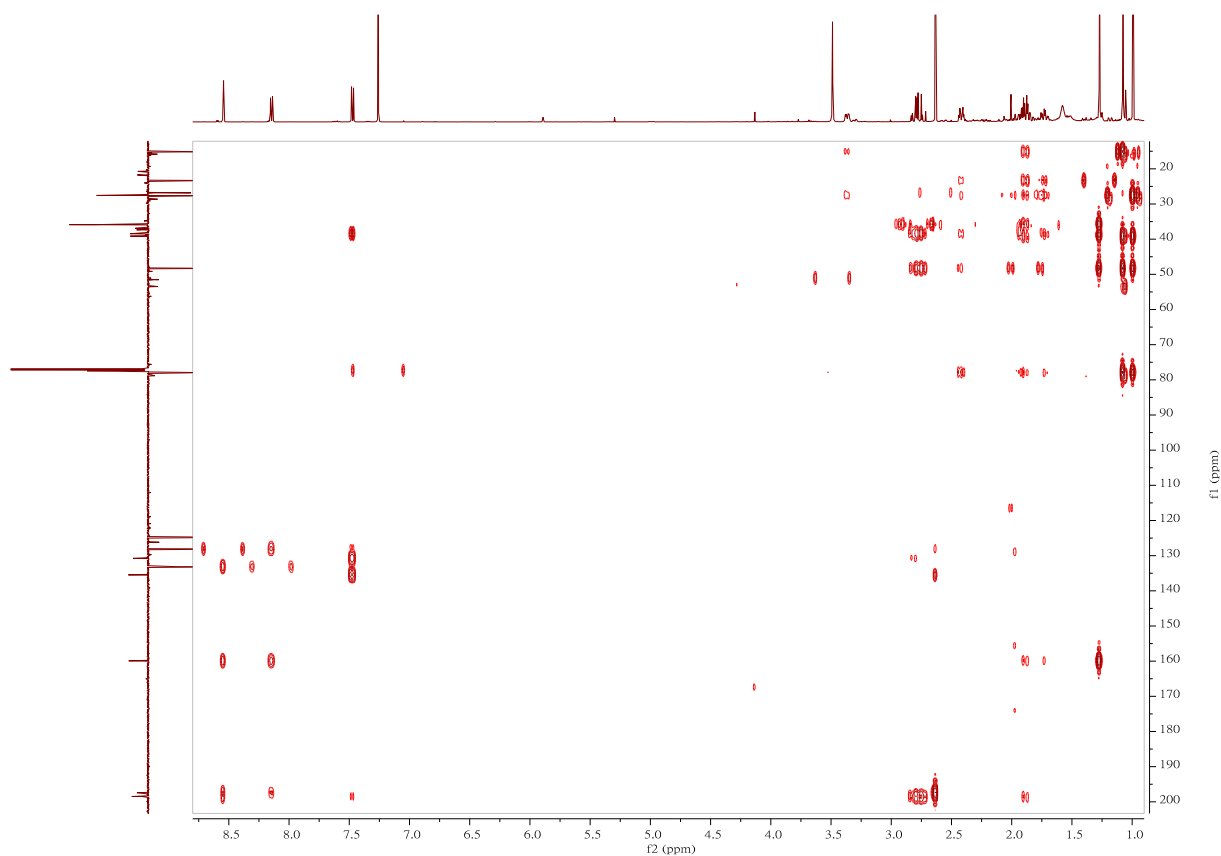

**Figure S89.** The HMBC spectrum of 16-nor-3 $\beta$ -hydroxy-abieta-8,11,13-trien-7,15-dione (**17**).

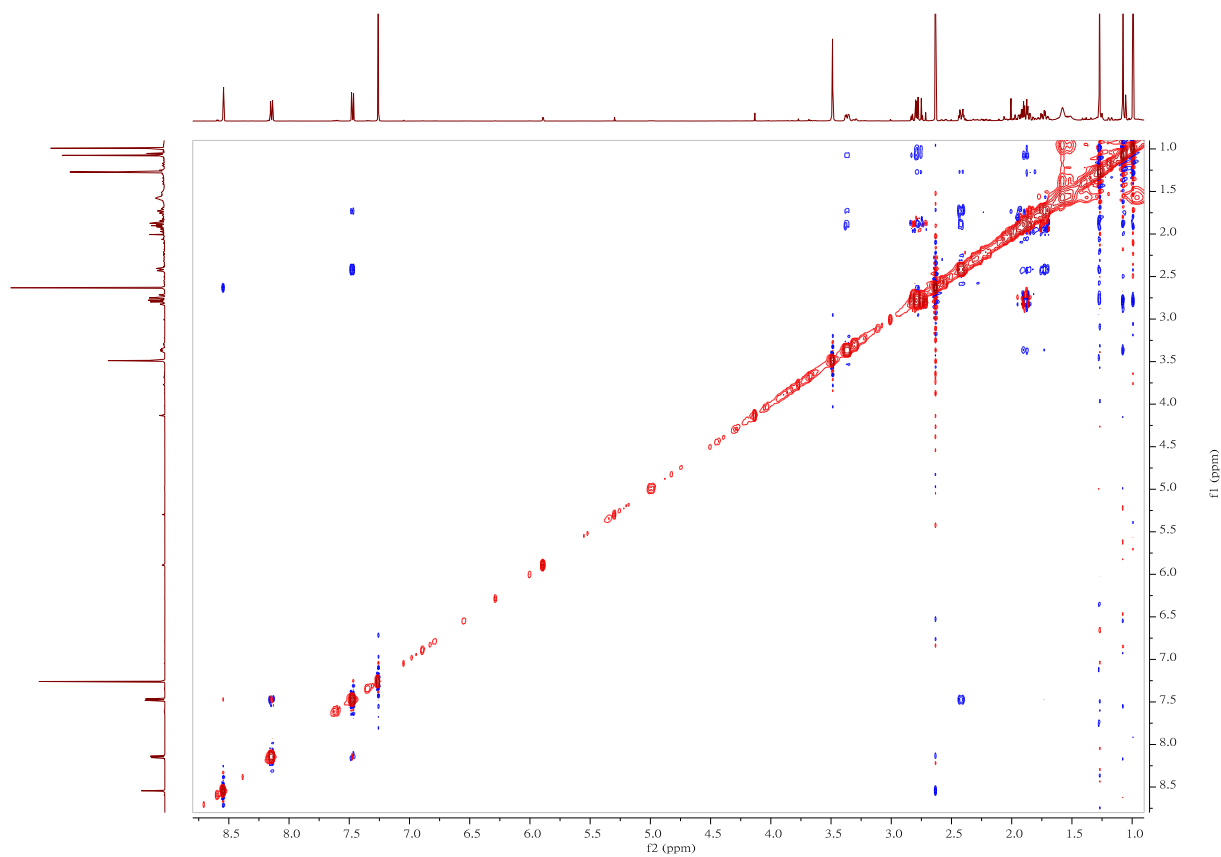

**Figure S90.** The NOESY spectrum of 16-nor-3 $\beta$ -hydroxy-abieta-8,11,13-trien-7,15-dione (**17**).

YC-20200917 #2539-2569 RT: 13.04-13.19 AV: 29 NL: 3.41E8  
T: FTMS + p ESI Full lock ms [100.0000-1000.0000]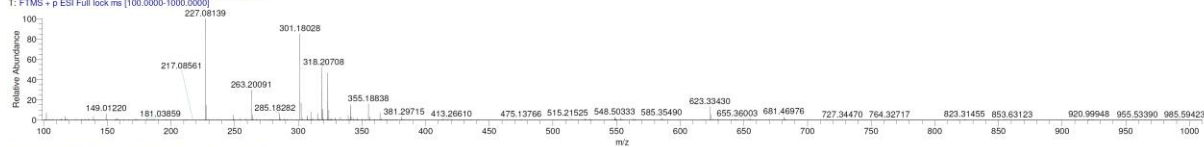YC-20200917 #2539-2569 RT: 13.04-13.19 AV: 29 NL: 2.90E8  
T: FTMS + p ESI Full lock ms [100.0000-1000.0000]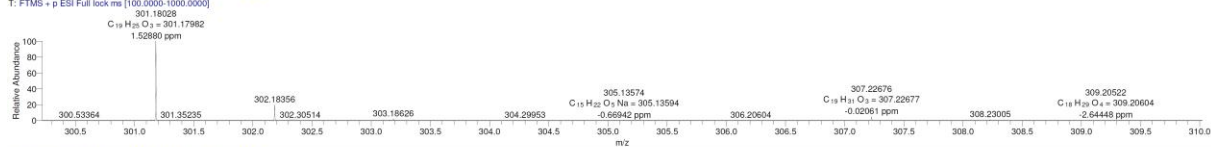YC-20200917 #2539-2569 RT: 13.04-13.19 AV: 29 NL: 1.59E8  
T: FTMS + p ESI Full lock ms [100.0000-1000.0000]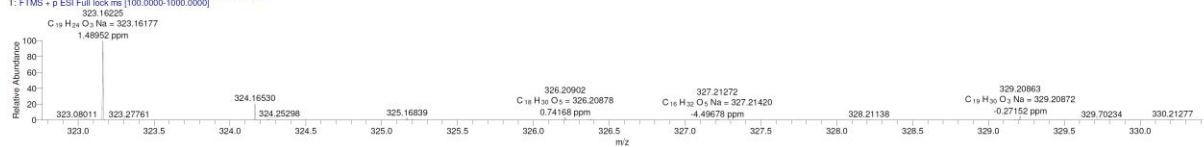

C19H24O3 +H: C19 H25 O3 p(gss, s/p:40) Chrg 1R: 70...

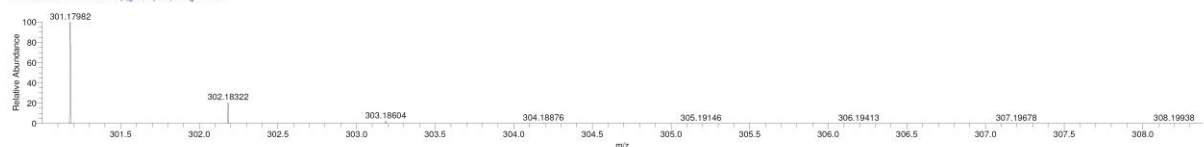

C19H24O3 +Na: C19 H24 O3 Na1 p(gss, s/p:40) Chrg 1...

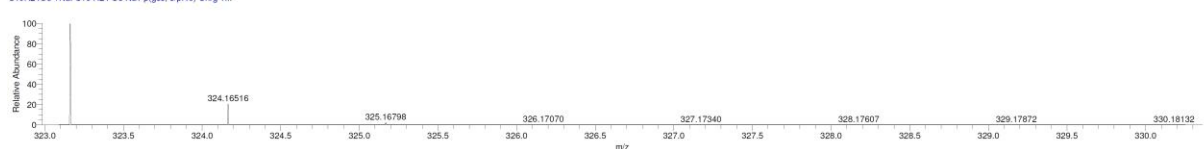

**Figure S91.** The HR-ESI-MS spectra of 16-nor-3 $\beta$ -hydroxy-abieta-8,11,13-trien-7,15-dione (**17**).

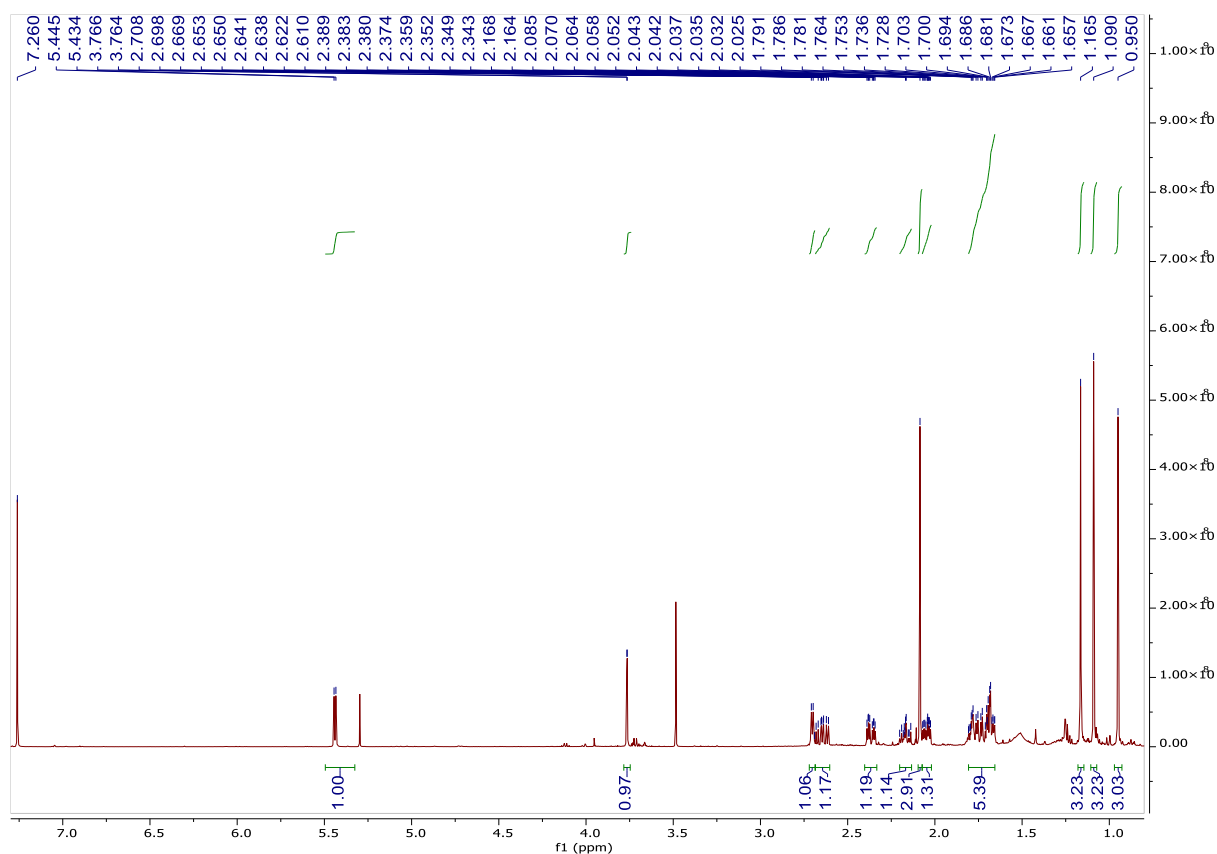

**Figure S92.** The <sup>1</sup>H-NMR spectrum of *ent*-8 $\beta$ ,14 $\beta$ -epoxyabieta-3-one-11,13(15)-dien-16,12-olide (**19**) (500 MHz, CDCl<sub>3</sub>).

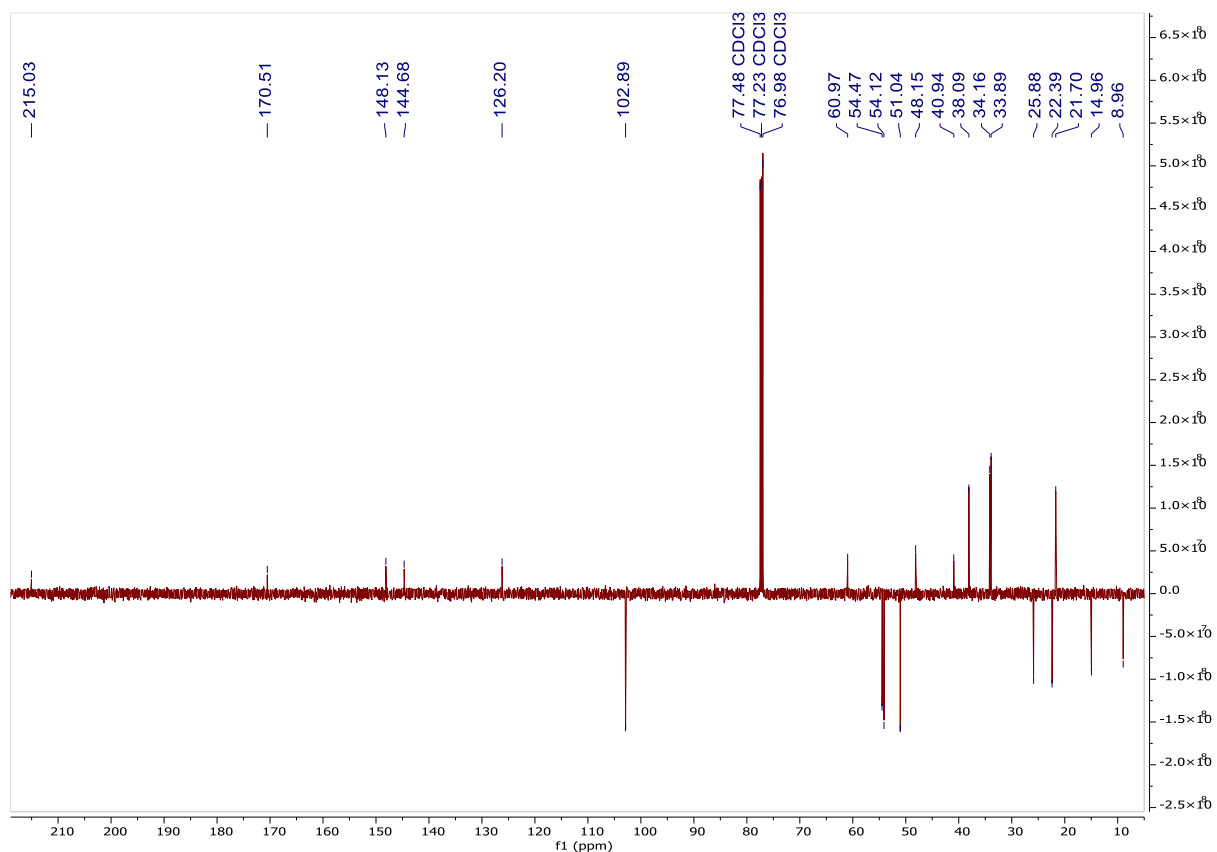

**Figure S93.** The <sup>13</sup>C-JMOD spectrum of *ent*-8 $\beta$ ,14 $\beta$ -epoxyabieta-3-one-11,13(15)-dien-16,12-olide (**19**) (125 MHz, CDCl<sub>3</sub>).

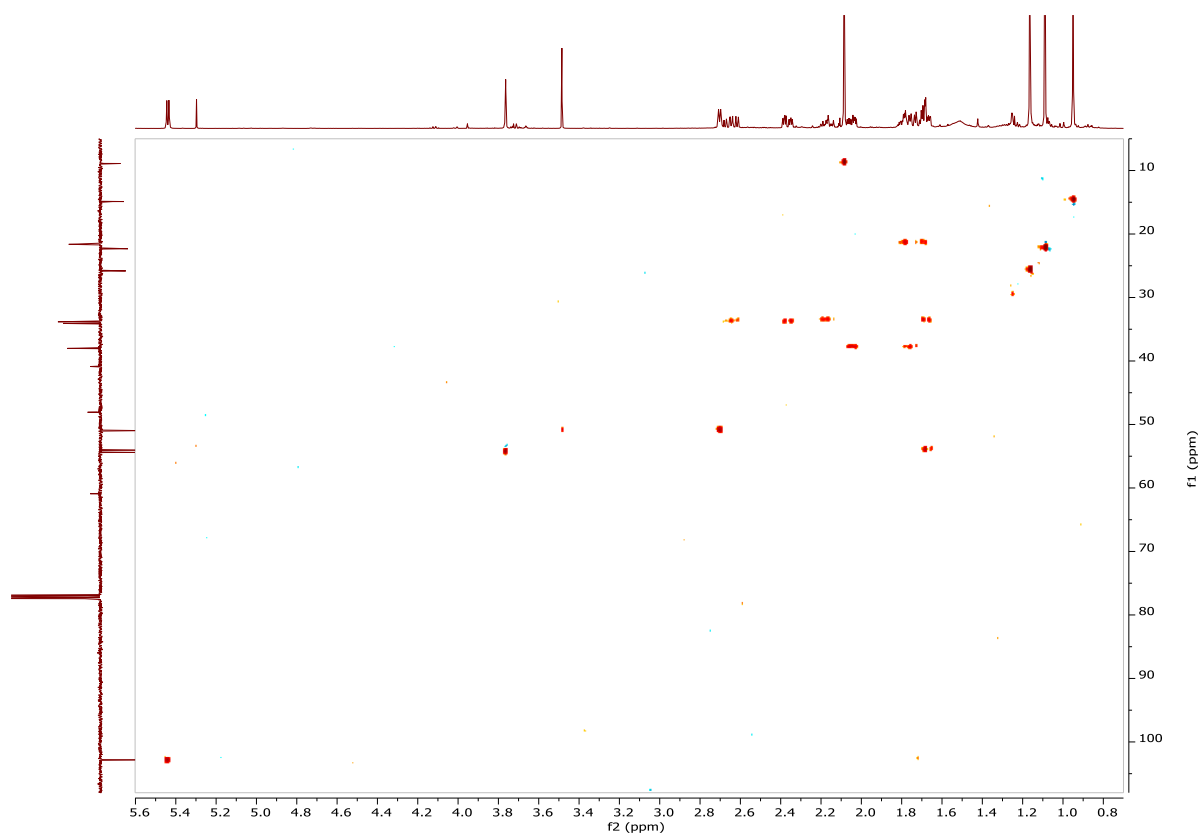

**Figure S94.** The HSQC spectrum of *ent*-8 $\beta$ ,14 $\beta$ -epoxyabieta-3-one-11,13(15)-dien-16,12-olide (19).

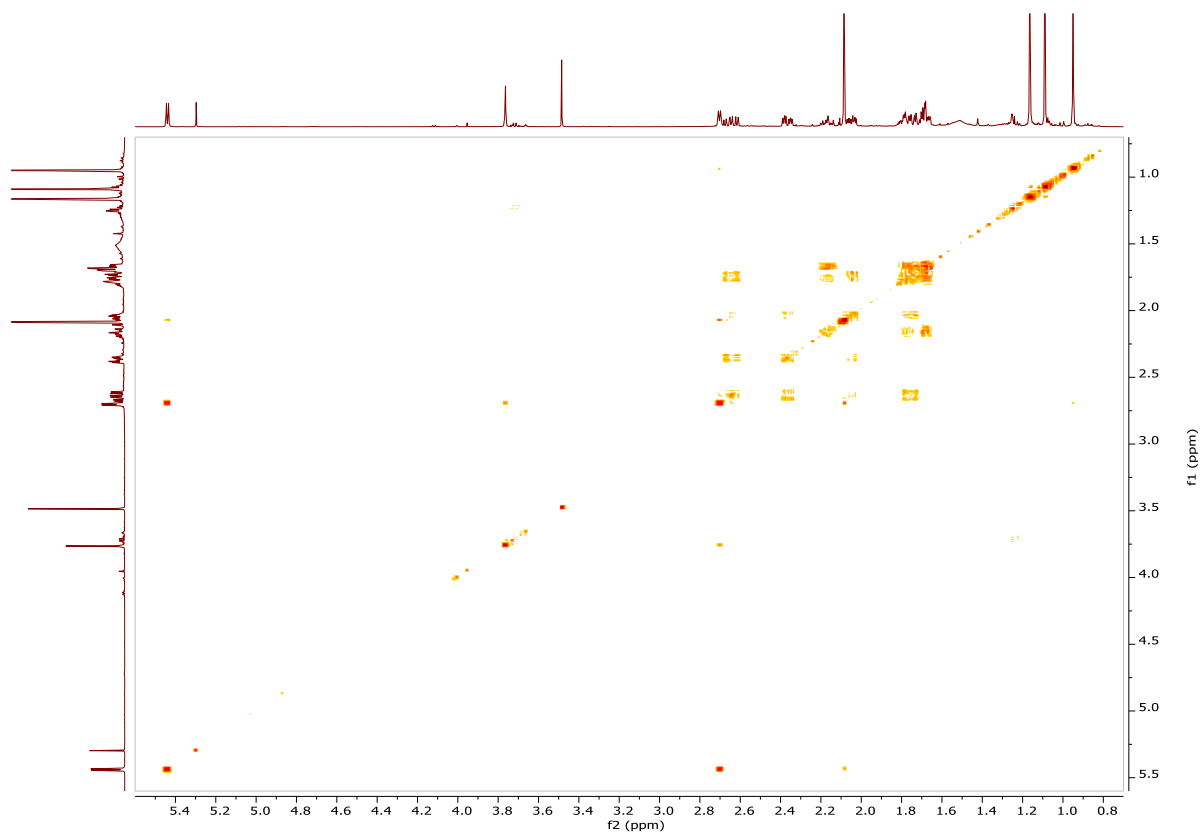

**Figure S95.** The <sup>1</sup>H-<sup>1</sup>H COSY spectrum of *ent*-8 $\beta$ ,14 $\beta$ -epoxyabieta-3-one-11,13(15)-dien-16,12-olide (19).



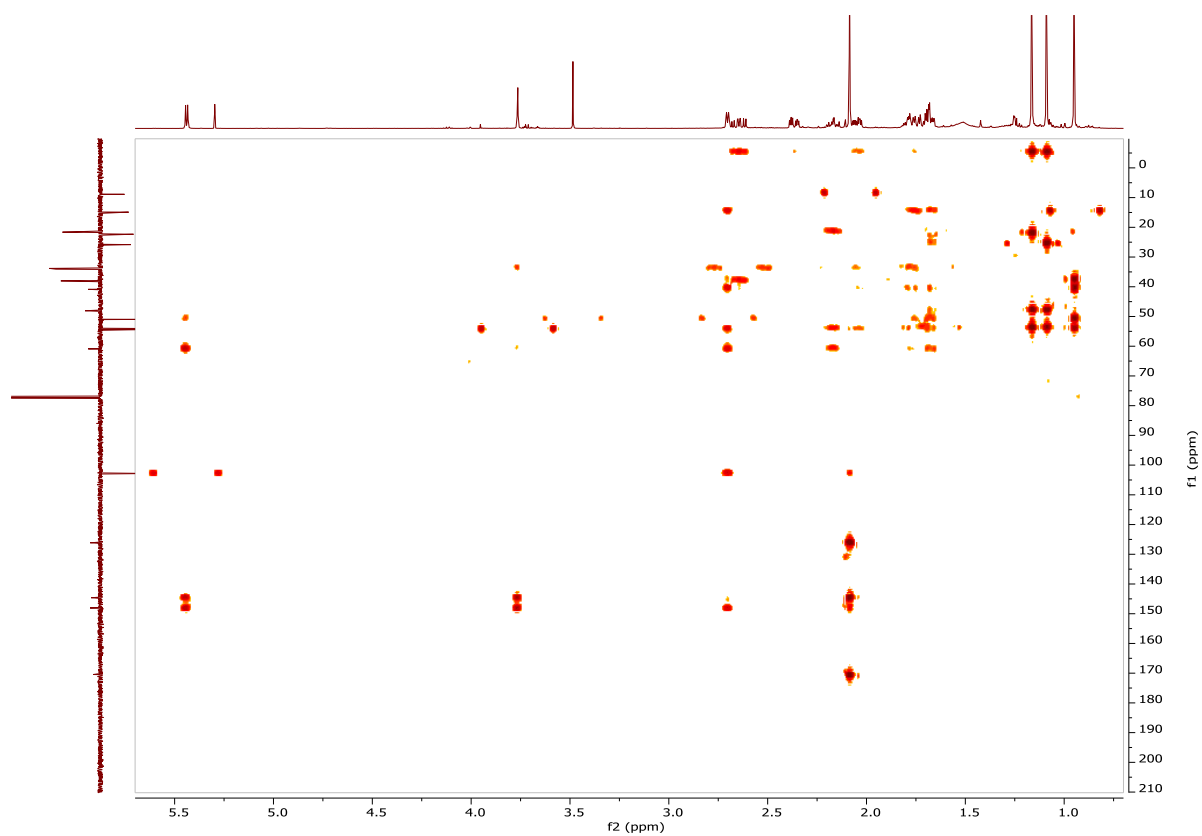

**Figure S96.** The HMBC spectrum of *ent*-8 $\beta$ ,14 $\beta$ -epoxyabieta-3-one-11,13(15)-dien-16,12-olide (19).

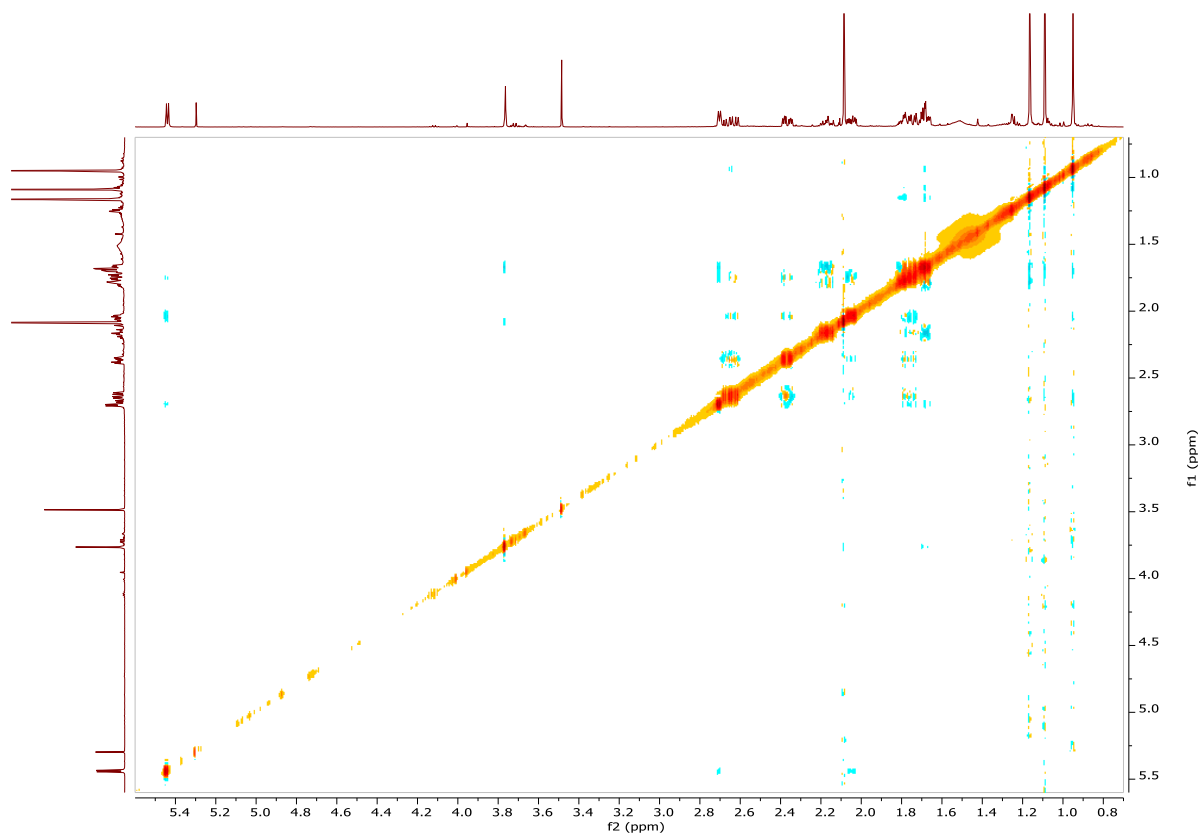

**Figure S97.** The NOESY spectrum of *ent*-8 $\beta$ ,14 $\beta$ -epoxyabieta-3-one-11,13(15)-dien-16,12-olide (19).

1-5, 11-14

YC-20200917 #487-508 RT: 2.49-2.60 AV: 22 NL: 6.18E7  
T: FTMS + p ESI Full lock ms [100.0000-1000.0000]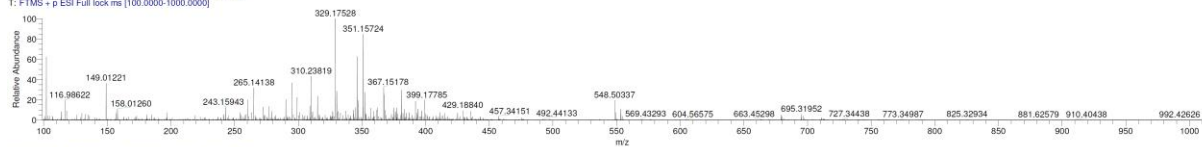YC-20200917 #487-508 RT: 2.49-2.60 AV: 22 NL: 6.18E7  
T: FTMS + p ESI Full lock ms [100.0000-1000.0000]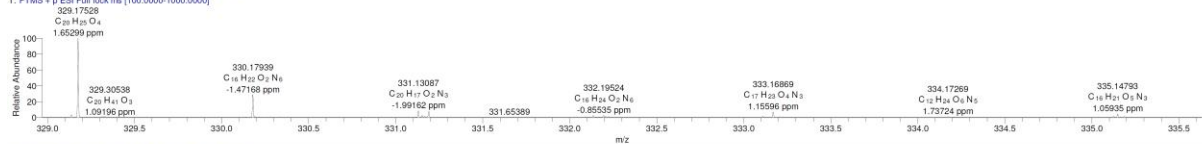YC-20200917 #487-508 RT: 2.49-2.60 AV: 22 NL: 5.24E7  
T: FTMS + p ESI Full lock ms [100.0000-1000.0000]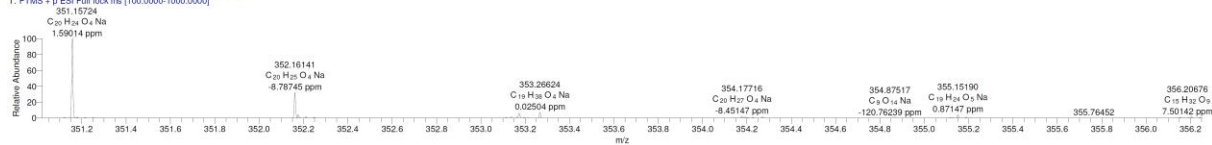

C20H24O4 +H: C20 H25 O4 p(gss, s/p:40) Chrg 1R: 70...

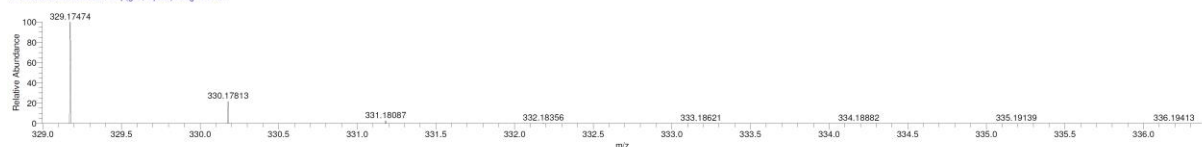

C20H24O4 +Na: C20 H24 O4 Na1 p(gss, s/p:40) Chrg 1...

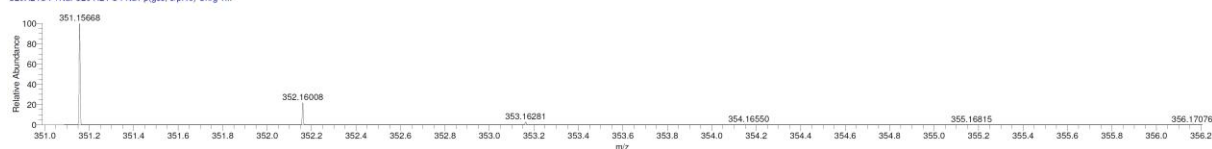

**Figure S98.** The HR-ESI-MS spectra of *ent*-8 $\beta$ ,14 $\beta$ -epoxyabieta-3-one-11,13(15)-dien-16,12-olide (19).

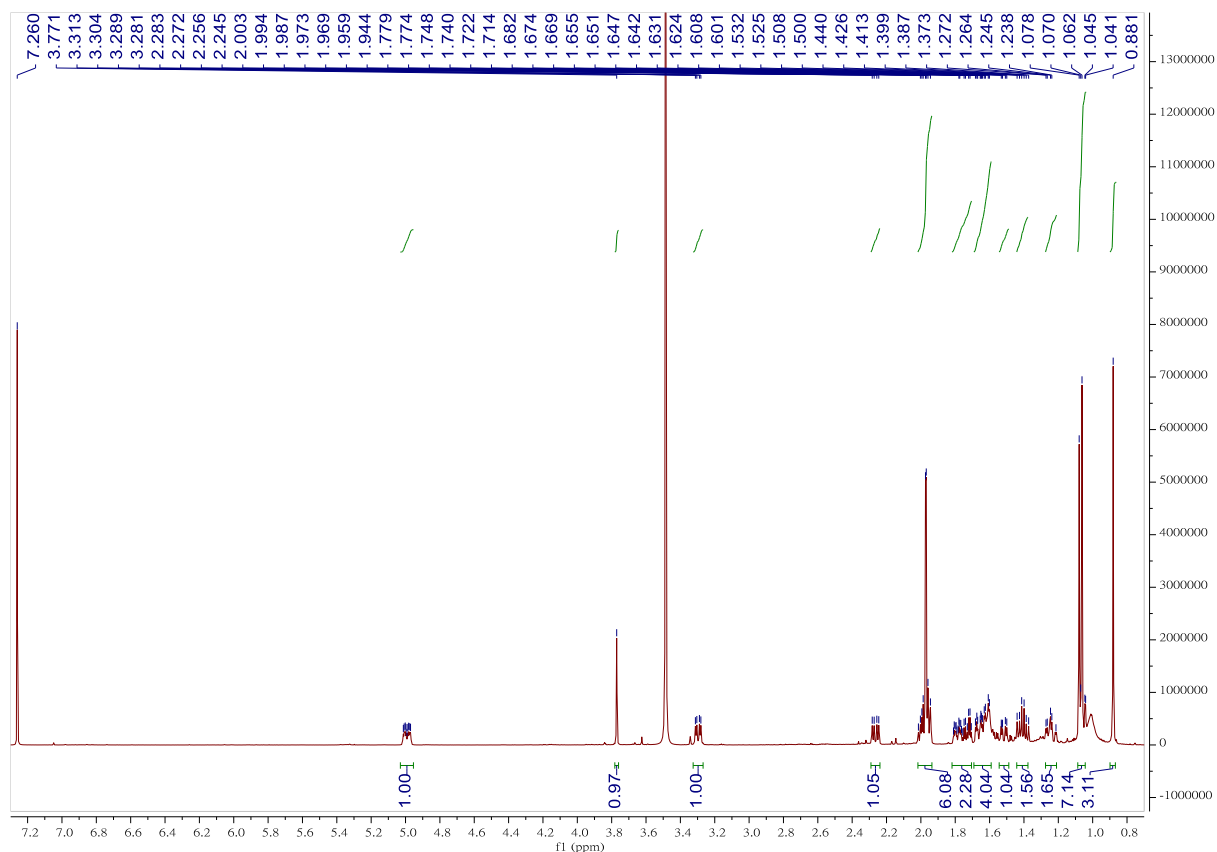

**Figure S99.** The  $^1\text{H}$ -NMR spectrum of *ent*-8 $\beta$ ,14 $\beta$ -epoxyabieta-3 $\alpha$ -hydroxy-13(15)-en-16,12-olide (**20**) (500 MHz,  $\text{CDCl}_3$ ).

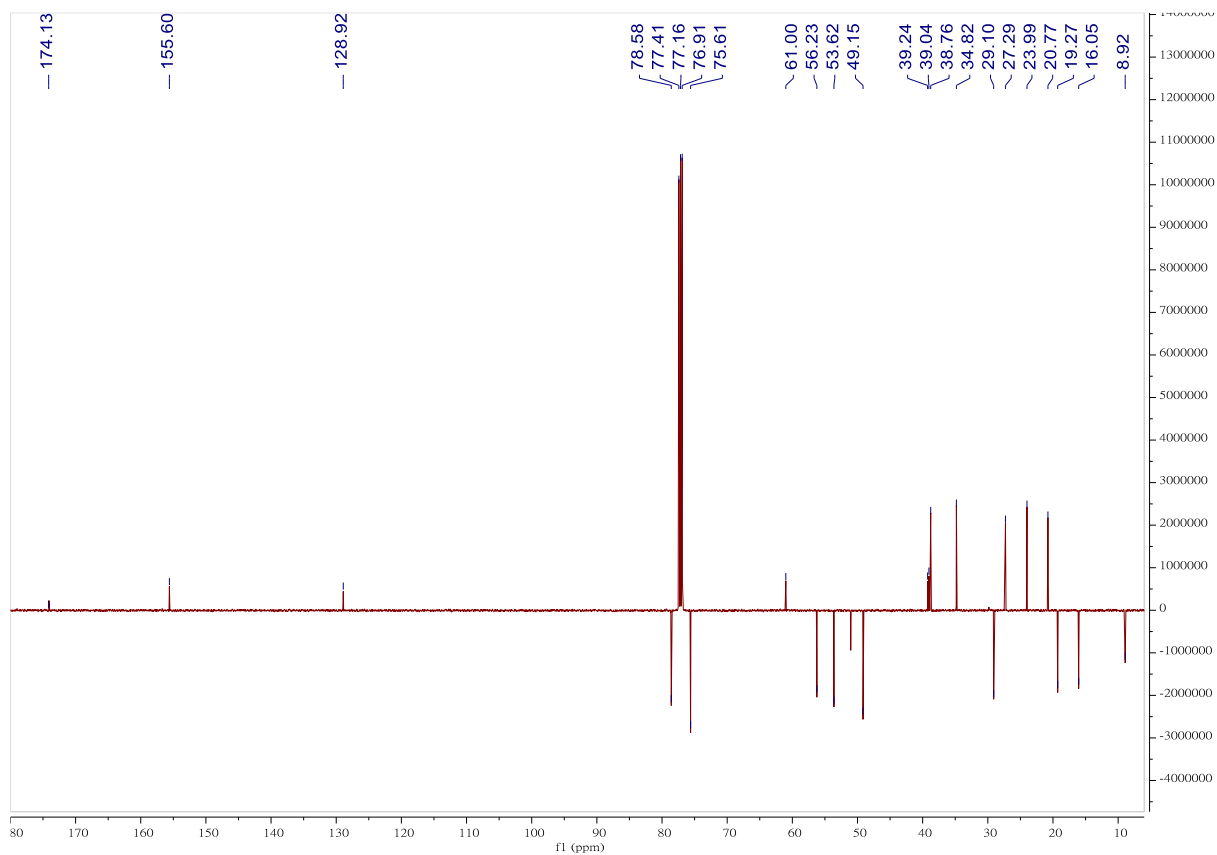

**Figure S100.** The  $^{13}\text{C}$ -JMOD spectrum of *ent*-8 $\beta$ ,14 $\beta$ -epoxyabieta-3 $\alpha$ -hydroxy-13(15)-en-16,12-olide (**20**) (125 MHz,  $\text{CDCl}_3$ ).

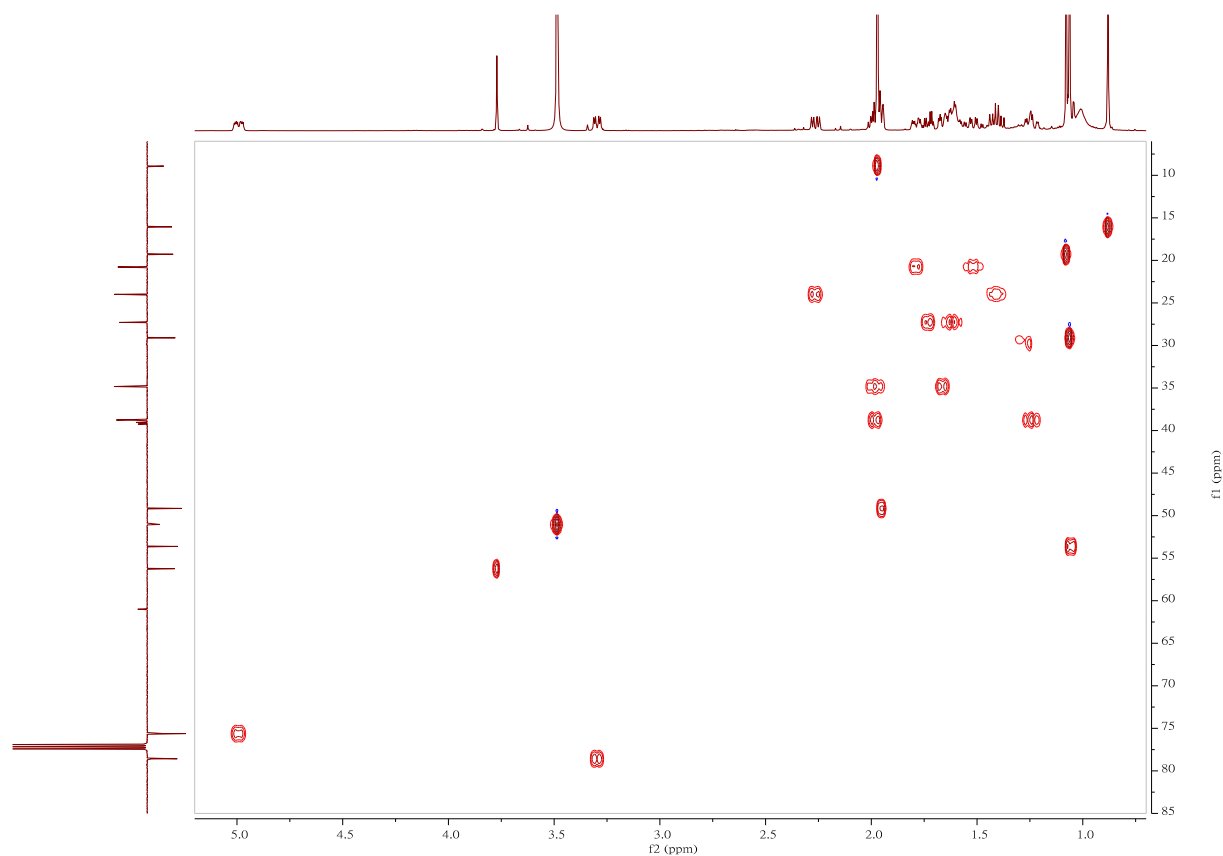

**Figure S101.** The HSQC spectrum of *ent*-8 $\beta$ ,14 $\beta$ -epoxyabieta-3 $\alpha$ -hydroxy-13(15)-en-16,12-olide (20).

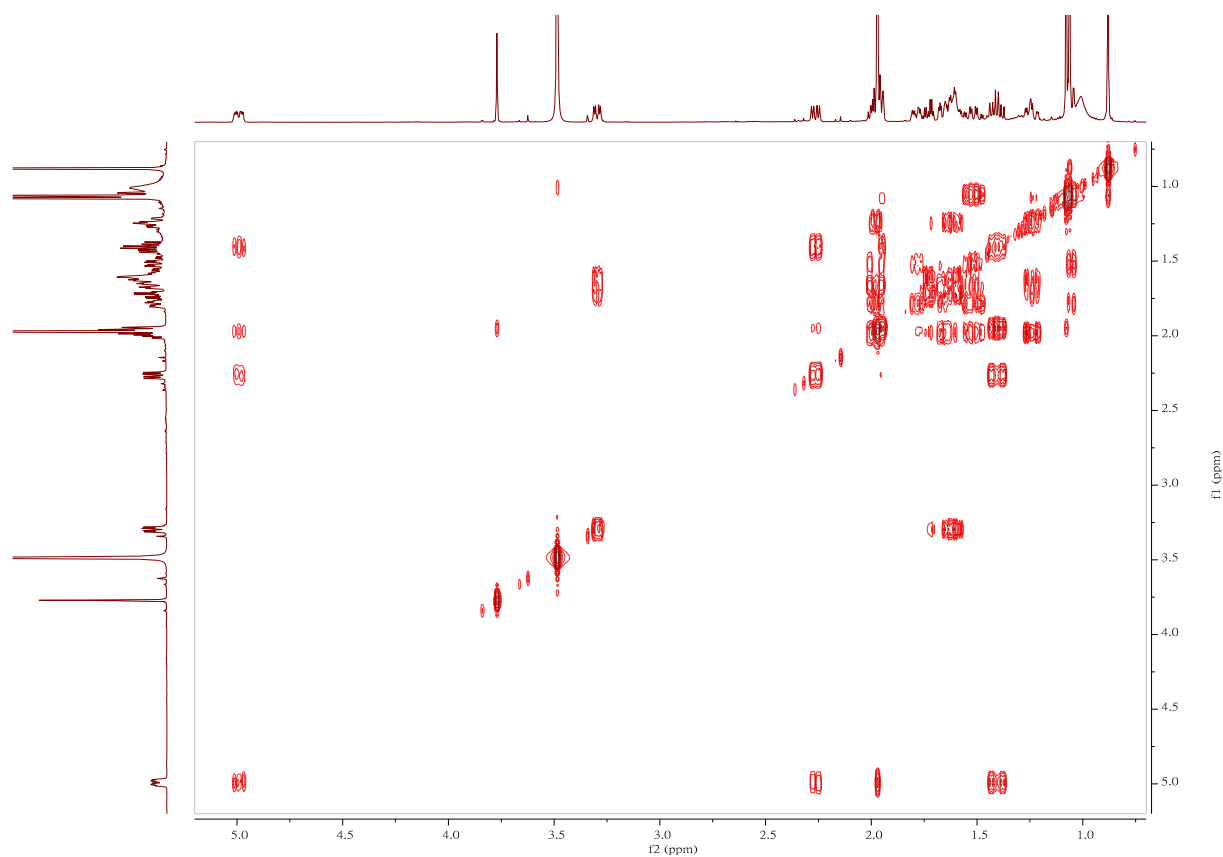

**Figure S102.** The <sup>1</sup>H-<sup>1</sup>H COSY spectrum of *ent*-8 $\beta$ ,14 $\beta$ -epoxyabieta-3 $\alpha$ -hydroxy-13(15)-en-16,12-olide (20).

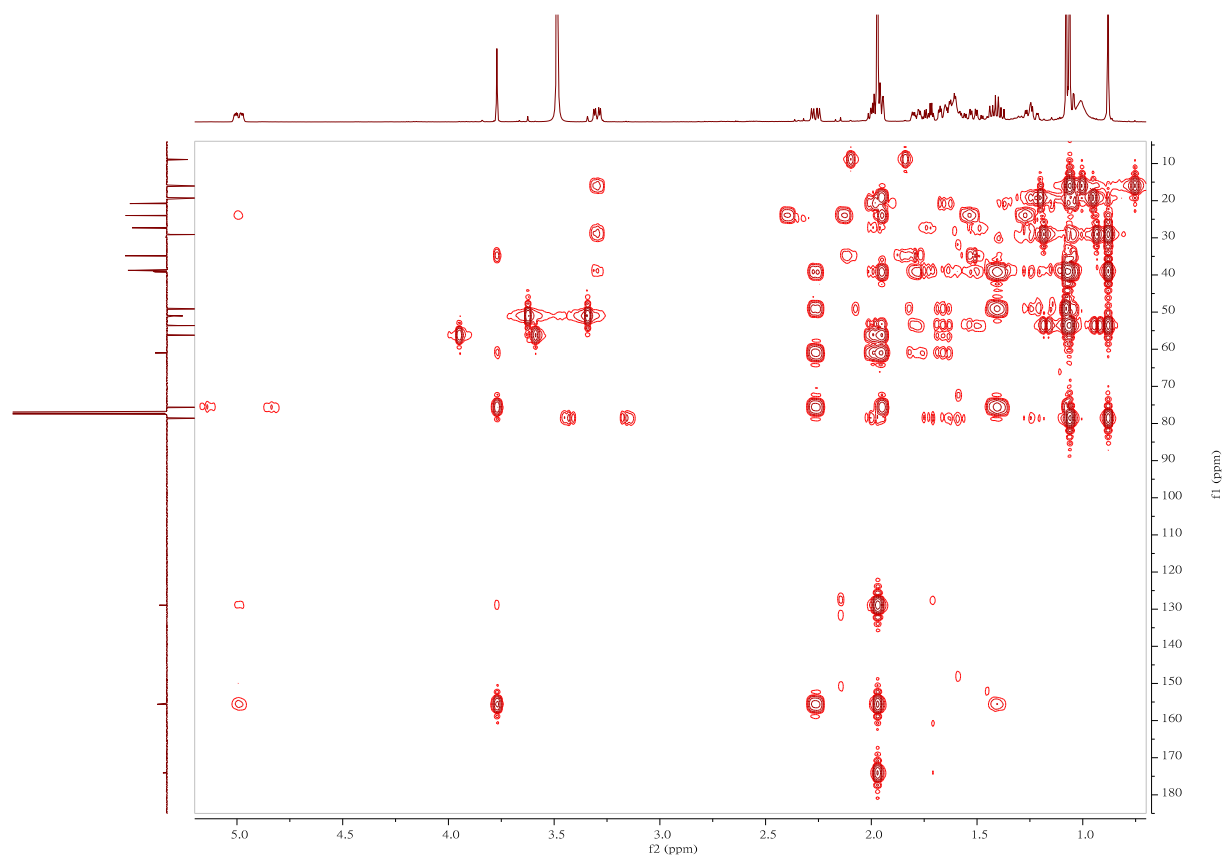

**Figure S103.** The HMBC spectrum of *ent*-8 $\beta$ ,14 $\beta$ -epoxyabieta-3 $\alpha$ -hydroxy-13(15)-en-16,12-olide (**20**).

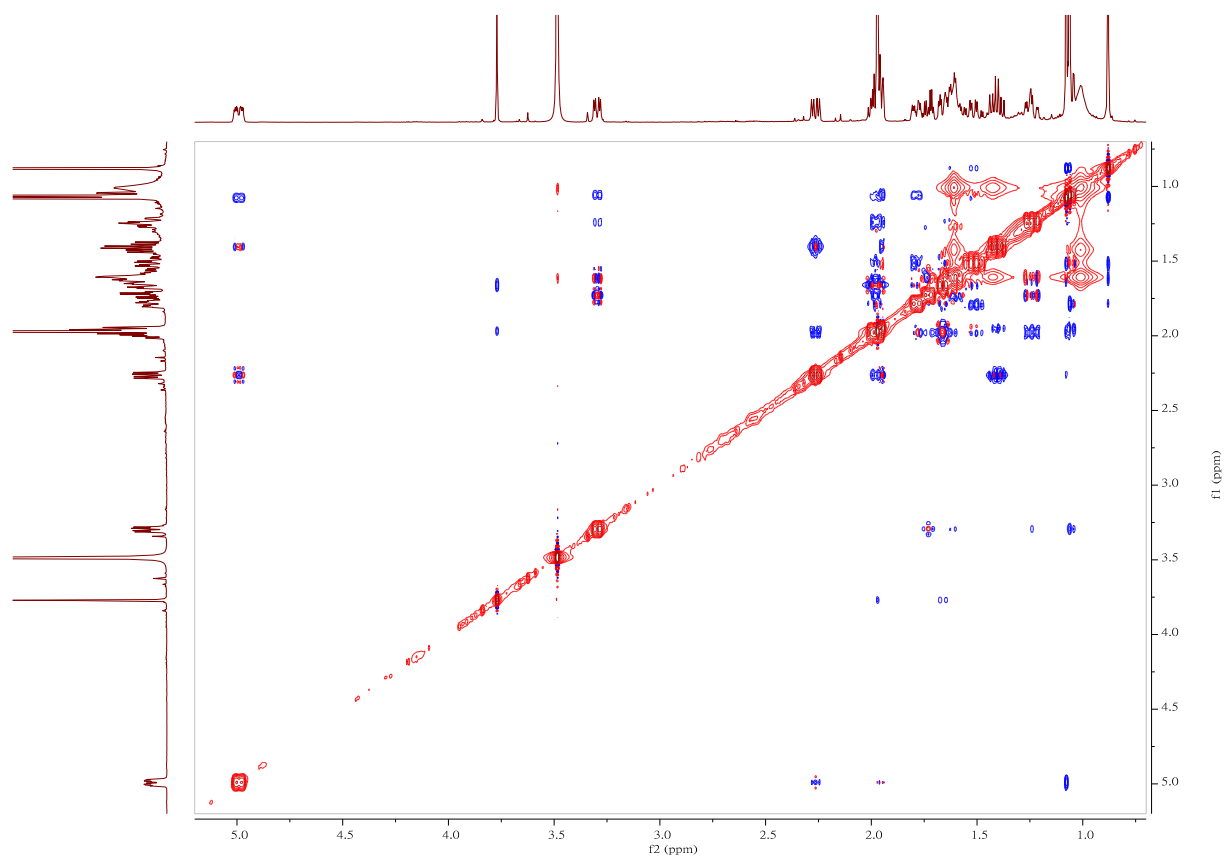

**Figure S104.** The NOESY spectrum of *ent*-8 $\beta$ ,14 $\beta$ -epoxyabieta-3 $\alpha$ -hydroxy-13(15)-en-16,12-olide (**20**).

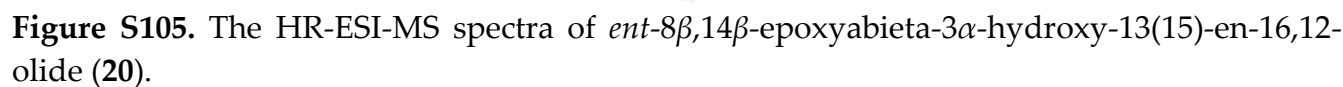

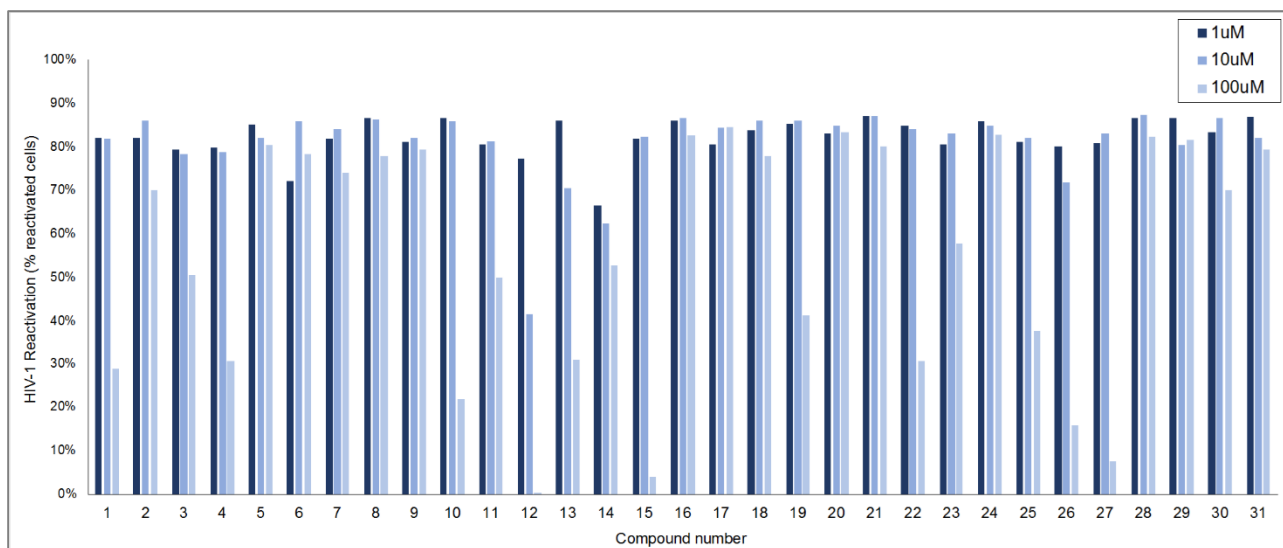

**Figure S106.** 24 hours cell viability after exposure to the compounds **1–31**.

All compounds were resuspended in DMSO at a concentration of 10 mM, and diluted with PBS and tested with J-lat 10.6 cells at concentrations of 100  $\mu$ M, 10  $\mu$ M, and 1  $\mu$ M. 1% DMSO was used as a control to account for any effect of DMSO in the highest dilution of compounds.
